# Supplementary material for: Friedel–Crafts reaction of indoles with vicinal tricarbonyl compounds generated in situ from 1,3-dicarbonyl compounds and TEMPO: highly selective synthesis of tertiary alcohols
Source: Royal Society of Chemistry journal article supplement (doi:10.1039/c5ra17383c), 2015-01-01

# **Friedel-Crafts Reaction of Indoles with Vicinal Tricarbonyl Compounds Generated in Situ from 1,3-Dicarbonyl Compounds and TEMPO: Highly Selective Synthesis of Tertiary Alcohol**

**Jianwei Yan<sup>a\*</sup>, Tianjun Ni<sup>b</sup>, Fulin Yan<sup>a</sup>, Jixian Zhang<sup>a</sup>, Fangfang Zhuang<sup>a</sup>**

<sup>a</sup>School of Pharmacy, Xinxiang Medical University, Xinxiang, Henan 453003, P. R. China;

<sup>b</sup>Department of Chemistry, Xinxiang Medical University, Xinxiang, Henan 453003, P. R. China

[jwyansimm@163.com](mailto:jwyansimm@163.com)

## **Supporting Information**

### **List of contents**

|                                                                             |               |
|-----------------------------------------------------------------------------|---------------|
| <b>1. General Considerations</b>                                            | <b>S2</b>     |
| <b>2. Characterization data of Compounds 3aa-3oa</b>                        | <b>S2-7</b>   |
| <b>3. Characterization data of Compound 4ab-4ai</b>                         | <b>S8-9</b>   |
| <b>4. Characterization data of Compound 6aa-6ba</b>                         | <b>S10</b>    |
| <b>5. <sup>1</sup>H and <sup>13</sup>C NMR Spectra of Compounds 3aa-3oa</b> | <b>S11-28</b> |
| <b>6. <sup>1</sup>H and <sup>13</sup>C NMR Spectra of Compounds 4ab-4ah</b> | <b>S29-35</b> |
| <b>7. <sup>1</sup>H and <sup>13</sup>C NMR Spectra of Compound 6aa-6ba</b>  | <b>S36-37</b> |
| <b>8. X-ray crystal structure of 3aa</b>                                    | <b>S38</b>    |

## 1. General Considerations.

All  $^1\text{H}$  NMR and  $^{13}\text{C}$  NMR spectra were measured in  $\text{CDCl}_3$  using a Bruker ASCEND 400 spectrometer. Chemical shifts are expressed in ppm and  $J$  values are given in Hz. High resolution mass spectra were recorded on Bruker micrOTOF-QIII MS (ESI). Column chromatography was performed with 200-300 mesh silica gel using flash column techniques. Melting points (uncorrected) were determined on a Yalixien X-4 melting point apparatus. All the solvents and reagents were used directly as obtained commercially unless otherwise noted.

Procedure for the synthesis of **3aa**. A solution of indole (1a) (117 mg, 1.0 mmol), ethyl acetoacetate (2a) (143 mg, 1.1 mmol), and TEMPO (468 mg, 3.0 mmol) in acetic acid (5.0 mL) under an air atmosphere was stirred at 50 °C for 1 h (complete consumption of indicated by TLC). The mixture was then concentrated in vacuo to give a residue that was dissolved in ethyl acetate (50 mL). Washing the ethyl acetate solution with aqueous  $\text{NaHCO}_3$  (2×30 mL) followed by drying over sodium sulphate and concentration in vacuo gave a residue that was subjected to flash chromatography on silica gel (petroleum ether/ethyl acetate = 2:1 as an eluent) to afford **3aa** as a white solid (85%).

## 2. Characterization Data of Compounds 3aa-30a:

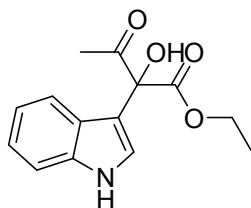

**ethyl 2-hydroxy-2-(1H-indol-3-yl)-3-oxobutanoate (3aa)**

White solid: m.p. 136-137 °C.  $^1\text{H}$  NMR (400 MHz,  $\text{CDCl}_3$ )  $\delta$  8.39 (s, 1H), 7.55 (d,  $J = 8.0$  Hz, 1H), 7.37 (d,  $J = 2.5$  Hz, 1H), 7.31 (d,  $J = 8.1$  Hz, 1H), 7.19 (t,  $J = 7.4$  Hz, 1H), 7.11 (t,  $J = 7.4$  Hz, 1H), 4.81 (s, 1H), 4.42 – 4.24 (m, 2H), 2.25 (s, 3H), 1.31 (t,  $J = 7.1$  Hz, 3H);  $^{13}\text{C}$  NMR (101 MHz,  $\text{CDCl}_3$ )  $\delta$  204.9, 170.4, 136.6, 125.1, 124.3, 122.7, 120.5, 120.3, 111.9, 111.6, 82.3, 62.9, 25.1, 14.2; HRMS calcd for  $\text{C}_{14}\text{H}_{15}\text{NO}_4\text{Na}$  ( $\text{M}+\text{Na}$ ) $^+$  284.0893, found 284.0907.

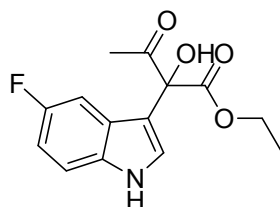

**ethyl 2-(5-fluoro-1H-indol-3-yl)-2-hydroxy-3-oxobutanoate (3ba)**

White solid: m.p. 129-130 °C.  $^1\text{H}$  NMR (400 MHz,  $\text{CDCl}_3$ )  $\delta$  8.47 (s, 1H), 7.46 (d,  $J = 2.7$  Hz, 1H), 7.28 – 7.20 (m, 2H), 6.95 (td,  $J = 9.0, 2.5$  Hz, 1H), 4.80 (s, 1H), 4.45 – 4.27 (m, 2H), 2.26 (s, 3H), 1.34 (t,  $J = 7.1$  Hz, 3H);  $^{13}\text{C}$  NMR (101 MHz,  $\text{CDCl}_3$ )  $\delta$  204.4, 170.2, 158.0 (d,  $J = 233.9$  Hz), 132.97, 125.83,

125.42 (d,  $J = 10.5$  Hz), 112.1 (d,  $J = 9.7$  Hz), 111.9 (d,  $J = 4.8$  Hz), 110.1 (d,  $J = 26.3$  Hz), 105.4 (d,  $J = 24.5$  Hz), 82.1, 62.9, 24.8, 14.0; HRMS calcd for  $C_{14}H_{14}FNO_4Na$  ( $M+Na$ )<sup>+</sup> 302.0799, found 302.0812.

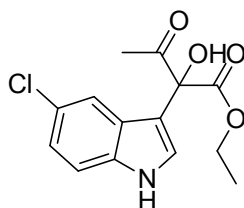

**ethyl 2-(5-chloro-1H-indol-3-yl)-2-hydroxy-3-oxobutanoate (3ca)**

White solid: m.p. 144-145 °C. <sup>1</sup>H NMR (400 MHz, CDCl<sub>3</sub>) δ 8.54 (s, 1H), 7.55 (s, 1H), 7.34 (s, 1H), 7.18 (d,  $J = 8.5$  Hz, 1H), 7.12 (d,  $J = 8.6$  Hz, 1H), 4.81 (s, 1H), 4.45 – 4.24 (m, 2H), 2.24 (s, 3H), 1.32 (t,  $J = 7.1$  Hz, 3H); <sup>13</sup>C NMR (101 MHz, Acetone) δ 204.6, 171.1, 136.3, 127.7, 127.0, 125.4, 122.6, 121.1, 113.8, 112.7, 83.5, 62.7, 14.3; HRMS calcd for  $C_{14}H_{14}ClNO_4Na$  ( $M+Na$ )<sup>+</sup> 318.0504, found 318.0516.

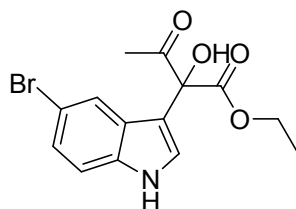

**ethyl 2-(5-bromo-1H-indol-3-yl)-2-hydroxy-3-oxobutanoate (3da)**

White solid: m.p. 151-152 °C. <sup>1</sup>H NMR (400 MHz, CDCl<sub>3</sub>) δ 8.45 (s, 1H), 7.75 (s, 1H), 7.45 (s, 1H), 7.29 (d,  $J = 7.8$  Hz, 1H), 7.21 (d,  $J = 8.6$  Hz, 1H), 4.78 (s, 1H), 4.44 – 4.29 (m, 2H), 2.26 (s, 3H), 1.35 (t,  $J = 7.1$  Hz, 3H); <sup>13</sup>C NMR (101 MHz, CDCl<sub>3</sub>) δ 204.3, 170.3, 135.2, 126.9, 125.7, 125.4, 123.1, 113.9, 113.0, 111.7, 82.2, 63.1, 24.9, 14.1; HRMS calcd for  $C_{14}H_{14}BrNO_4Na$  ( $M+Na$ )<sup>+</sup> 361.9998, found 362.0003.

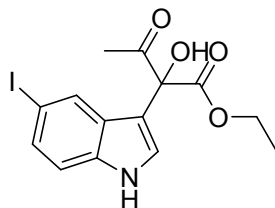

**ethyl 2-hydroxy-2-(5-iodo-1H-indol-3-yl)-3-oxobutanoate (3ea)**

White solid: m.p. 159-160 °C. <sup>1</sup>H NMR (400 MHz, CDCl<sub>3</sub>) δ 8.42 (s, 1H), 7.95 (s, 1H), 7.46 (d,  $J = 8.5$  Hz, 1H), 7.42 (s, 1H), 7.13 (d,  $J = 8.6$  Hz, 1H), 4.76 (s, 1H), 4.44 – 4.28 (m, 2H), 2.26 (s, 3H), 1.36 (t,  $J = 7.1$  Hz, 3H); <sup>13</sup>C NMR (101 MHz, CDCl<sub>3</sub>) δ 204.3, 170.3, 135.7, 131.2, 129.4, 127.7, 124.9, 113.4, 111.4, 84.2, 82.2, 63.1, 24.9, 14.2; HRMS calcd for  $C_{14}H_{14}INO_4Na$  ( $M+Na$ )<sup>+</sup> 409.9860, found 409.9862.

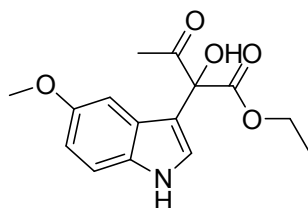

**ethyl 2-hydroxy-2-(5-methoxy-1H-indol-3-yl)-3-oxobutanoate (3fa)**

White solid: m.p. 108-109 °C. <sup>1</sup>H NMR (400 MHz, CDCl<sub>3</sub>) δ 8.40 (s, 1H), 7.35 (d, *J* = 2.7 Hz, 1H), 7.21 (d, *J* = 8.8 Hz, 1H), 7.00 (d, *J* = 2.3 Hz, 1H), 6.86 (dd, *J* = 8.8, 2.4 Hz, 1H), 4.81 (s, 1H), 4.45 – 4.26 (m, 2H), 3.82 (s, 3H), 2.27 (s, 3H), 1.34 (t, *J* = 7.1 Hz, 3H); <sup>13</sup>C NMR (101 MHz, CDCl<sub>3</sub>) δ 204.91, 170.32, 154.42, 131.59, 125.48, 124.81, 112.94, 112.24, 111.32, 101.72, 82.27, 77.39, 77.08, 76.76, 62.75, 55.80, 25.00, 14.10; HRMS calcd for C<sub>15</sub>H<sub>17</sub>NO<sub>5</sub>Na (M+Na)<sup>+</sup> 314.0999, found 314.1015.

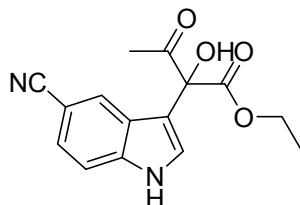

**ethyl 2-(5-cyano-1H-indol-3-yl)-2-hydroxy-3-oxobutanoate (3ga)**

Pale solid: m.p. 100-101 °C. <sup>1</sup>H NMR (400 MHz, CDCl<sub>3</sub>) δ 9.30 – 8.40 (br, s, 1H), 8.05 (s, 1H), 7.63 (s, 1H), 7.43 (s, 2H), 4.82 (s, 1H), 4.46 – 4.29 (m, 2H), 2.27 (s, 3H), 1.35 (t, *J* = 7.1 Hz, 3H); <sup>13</sup>C NMR (101 MHz, CDCl<sub>3</sub>) δ 203.7, 170.0, 138.2, 126.7, 126.4, 125.4, 125.1, 120.5, 112.9, 112.5, 103.6, 82.1, 63.3, 24.7, 14.1; HRMS calcd for C<sub>15</sub>H<sub>14</sub>N<sub>2</sub>O<sub>4</sub>Na (M+Na)<sup>+</sup> 309.0846, found 309.0860.

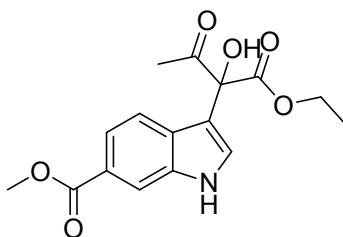

**methyl 3-(1-ethoxy-2-hydroxy-1,3-dioxobutan-2-yl)-1H-indole-6-carboxylate (3ha)**

White solid: m.p. 135-136 °C. <sup>1</sup>H NMR (400 MHz, CDCl<sub>3</sub>) δ 8.91 (s, 1H), 8.12 (s, 1H), 7.80 (d, *J* = 8.5 Hz, 1H), 7.61 (d, *J* = 8.4 Hz, 2H), 4.85 (s, 1H), 4.46 – 4.26 (m, 2H), 3.95 (s, 3H), 2.25 (s, 3H), 1.32 (t, *J* = 7.1 Hz, 3H); <sup>13</sup>C NMR (101 MHz, CDCl<sub>3</sub>) δ 204.4, 170.3, 168.1, 136.0, 128.8, 127.6, 124.3, 121.4, 120.1, 114.0, 112.3, 82.2, 63.1, 52.2, 24.9, 14.1; HRMS calcd for C<sub>16</sub>H<sub>17</sub>NO<sub>6</sub>Na (M+Na)<sup>+</sup> 342.0948, found 342.0951.

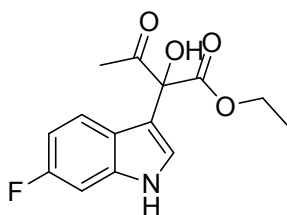

**ethyl 2-(6-fluoro-1H-indol-3-yl)-2-hydroxy-3-oxobutanoate (3ia)**

White solid: m.p. 139-140 °C. <sup>1</sup>H NMR (400 MHz, CDCl<sub>3</sub>) δ 8.48 (s, 1H), 7.49 (dd, *J* = 8.8, 5.3 Hz, 1H), 7.35 (d, *J* = 2.0 Hz, 1H), 7.00 (dd, *J* = 9.4, 2.2 Hz, 1H), 6.89 (td, *J* = 9.3, 2.3 Hz, 1H), 4.82 (s, 1H), 4.44 – 4.27 (m, 2H), 2.26 (s, 3H), 1.33 (t, *J* = 7.1 Hz, 3H); <sup>13</sup>C NMR (101 MHz, CDCl<sub>3</sub>) δ 204.5, 170.2, 160.0 (d, *J* = 245.6 Hz), 136.5 (d, *J* = 12.3 Hz), 124.5 (d, *J* = 3.3 Hz), 121.6, 121.3 (d, *J* = 10.0 Hz), 112.0, 109.3 (d, *J* = 24.2 Hz), 97.7 (d, *J* = 26.0 Hz), 82.2, 62.9, 24.8, 14.0; HRMS calcd for C<sub>14</sub>H<sub>14</sub>FNO<sub>4</sub>Na (M+Na)<sup>+</sup> 302.0799, found 302.0810.

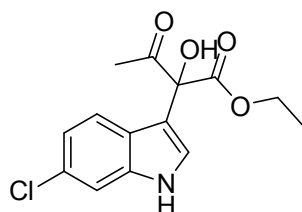

**ethyl 2-(6-chloro-1H-indol-3-yl)-2-hydroxy-3-oxobutanoate (3ja)**

White solid: m.p. 132-133 °C.  $^1\text{H}$  NMR (400 MHz,  $\text{CDCl}_3$ )  $\delta$  8.42 (s, 1H), 7.50 (d,  $J = 8.6$  Hz, 1H), 7.43 (d,  $J = 2.5$  Hz, 1H), 7.33 (d,  $J = 1.5$  Hz, 1H), 7.09 (dd,  $J = 8.6, 1.7$  Hz, 1H), 4.80 (s, 1H), 4.34 – 4.27 (m, 2H), 2.25 (s, 3H), 1.33 (t,  $J = 7.1$  Hz, 3H);  $^{13}\text{C}$  NMR (101 MHz,  $\text{CDCl}_3$ )  $\delta$  204.4, 170.1, 136.9, 128.6, 124.8, 123.7, 121.2, 121.2, 112.1, 111.4, 77.4, 77.0, 76.7, 24.8, 14.1; HRMS calcd for  $\text{C}_{14}\text{H}_{14}\text{ClNO}_4\text{Na}$  ( $\text{M}+\text{Na}$ ) $^+$  318.0504, found 318.0514.

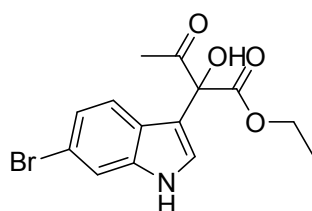

**ethyl 2-(6-bromo-1H-indol-3-yl)-2-hydroxy-3-oxobutanoate (3ka)**

White solid: m.p. 153-154 °C.  $^1\text{H}$  NMR (400 MHz,  $\text{CDCl}_3$ )  $\delta$  8.36 (s, 1H), 7.52 (s, 1H), 7.46 (d,  $J = 8.7$  Hz, 2H), 7.23 (d,  $J = 8.6$  Hz, 1H), 4.77 (s, 1H), 4.42 – 4.29 (m, 2H), 2.25 (s, 3H), 1.34 (t,  $J = 7.1$  Hz, 3H);  $^{13}\text{C}$  NMR (101 MHz,  $\text{CDCl}_3$ )  $\delta$  204.5, 170.3, 137.4, 124.8, 124.1, 123.9, 121.8, 116.4, 114.5, 112.3, 82.2, 63.1, 24.9, 14.2; HRMS calcd for  $\text{C}_{14}\text{H}_{14}\text{BrNO}_4\text{Na}$  ( $\text{M}+\text{Na}$ ) $^+$  361.9998, found 361.9993.

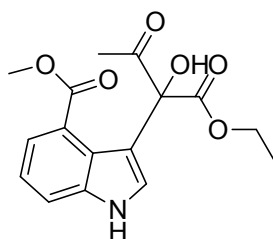

**methyl 3-(1-ethoxy-2-hydroxy-1,3-dioxobutan-2-yl)-1H-indole-4-carboxylate (3la)**

White solid: m.p. 113-114 °C.  $^1\text{H}$  NMR (400 MHz,  $\text{CDCl}_3$ )  $\delta$  9.07 (s, 1H), 7.71 (d,  $J = 7.5$  Hz, 1H), 7.27 (d,  $J = 7.7$  Hz, 2H), 7.07 (t,  $J = 7.8$  Hz, 1H), 6.70 (s, 1H), 6.37 (s, 1H), 4.38 – 4.22 (m, 2H), 3.89 (s, 3H), 2.46 (s, 3H), 1.31 (t,  $J = 7.1$  Hz, 3H);  $^{13}\text{C}$  NMR (101 MHz,  $\text{CDCl}_3$ )  $\delta$  206.3, 171.1, 170.6, 137.9, 127.6, 124.1, 122.3, 122.3, 121.2, 117.4, 113.4, 83.62, 77.4, 77.1, 76.8, 62.4, 52.7, 26.2, 14.0; HRMS calcd for  $\text{C}_{16}\text{H}_{17}\text{NO}_4\text{Na}$  ( $\text{M}+\text{Na}$ ) $^+$  342.0948, found 342.0954.

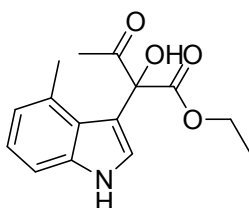

**ethyl 2-hydroxy-2-(4-methyl-1H-indol-3-yl)-3-oxobutanoate (3ma)**

White solid: m.p. 135-136 °C. <sup>1</sup>H NMR (400 MHz, CDCl<sub>3</sub>) δ 8.35 (s, 1H), 7.15 – 7.01 (m, 2H), 6.90 (d, *J* = 5.9 Hz, 1H), 6.82 (d, *J* = 2.2 Hz, 1H), 4.59 (s, 1H), 4.42 – 4.25 (m, 2H), 2.47 (s, 3H), 2.34 (s, 3H), 1.32 (t, *J* = 7.1 Hz, 3H); <sup>13</sup>C NMR (101 MHz, CDCl<sub>3</sub>) δ 207.1, 171.1, 137.3, 130.5, 124.9, 124.4, 122.9, 122.7, 113.0, 109.4, 82.8, 62.9, 26.8, 21.5, 14.1; HRMS calcd for C<sub>15</sub>H<sub>17</sub>NO<sub>4</sub>Na (M+Na)<sup>+</sup> 298.1050, found 298.1052.

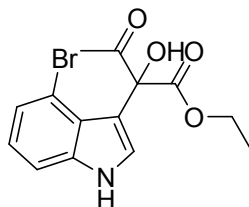

**ethyl 2-(4-bromo-1H-indol-3-yl)-2-hydroxy-3-oxobutanoate (3na)**

Pink solid: m.p. 132-133 °C. <sup>1</sup>H NMR (400 MHz, CDCl<sub>3</sub>) δ 9.07 (s, 1H), 7.31 (d, *J* = 7.5 Hz, 1H), 7.11 (d, *J* = 8.1 Hz, 1H), 6.96 (t, *J* = 7.8 Hz, 1H), 6.65 (s, 1H), 4.69 (s, 1H), 4.45 – 4.22 (m, 2H), 2.43 (s, 3H), 1.30 (t, *J* = 7.1 Hz, 3H); <sup>13</sup>C NMR (101 MHz, CDCl<sub>3</sub>) δ 206.9, 171.0, 138.2, 126.8, 125.3, 124.1, 123.5, 112.7, 112.2, 111.4, 82.2, 63.1, 27.4, 14.1; HRMS calcd for C<sub>14</sub>H<sub>14</sub>BrNO<sub>4</sub>Na (M+Na)<sup>+</sup> 361.9998, found 362.0005.

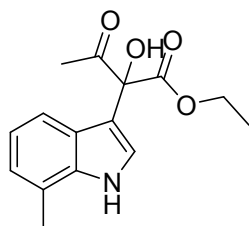

**ethyl 2-hydroxy-2-(7-methyl-1H-indol-3-yl)-3-oxobutanoate (3oa)**

White solid: m.p. 109-110 °C. <sup>1</sup>H NMR (400 MHz, CDCl<sub>3</sub>) δ 8.39 (s, 1H), 7.44 – 7.38 (m, 2H), 7.11 – 6.96 (m, 2H), 4.84 (s, 1H), 4.46 – 4.26 (m, 2H), 2.47 (s, 3H), 2.27 (s, 3H), 1.34 (t, *J* = 7.1 Hz, 3H); <sup>13</sup>C NMR (101 MHz, CDCl<sub>3</sub>) δ 204.9, 170.4, 136.1, 124.6, 124.0, 123.1, 120.6, 120.6, 117.9, 112.3, 82.2, 62.7, 25.0, 16.6, 14.1; HRMS calcd for C<sub>15</sub>H<sub>17</sub>NO<sub>4</sub>Na (M+Na)<sup>+</sup> 298.1050, found 298.1054.

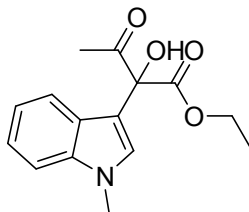

**ethyl 2-hydroxy-2-(1-methyl-1H-indol-3-yl)-3-oxobutanoate (3pa)**

Colourless oil. <sup>1</sup>H NMR (400 MHz, CDCl<sub>3</sub>) δ 7.60 (d, *J* = 8.0 Hz, 1H), 7.41 (s, 1H), 7.35 (d, *J* = 8.2 Hz, 1H), 7.28 (t, *J* = 7.5 Hz, 1H), 7.16 (t, *J* = 7.4 Hz, 1H), 4.86 (s, 1H), 4.38 (dddd, *J* = 22.7, 10.7, 7.1, 3.6 Hz, 2H), 3.81 (s, 3H), 2.30 (s, 3H), 1.37 (t, *J* = 7.1 Hz, 3H); <sup>13</sup>C NMR (101 MHz, CDCl<sub>3</sub>) δ 204.4, 170.3,

168.1, 136.0, 128.8, 127.6, 124.3, 121.4, 120.1, 114.0, 112.3, 82.2, 63.1, 52.2, 24.9, 14.1; HRMS calcd for  $C_{15}H_{17}NO_4Na$  ( $M+Na$ )<sup>+</sup> 298.1050, found 298.1044.

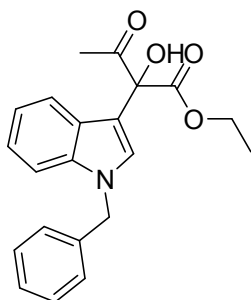

**ethyl 2-(1-benzyl-1H-indol-3-yl)-2-hydroxy-3-oxobutanoate (3qa)**

Pale solid: m.p. 64-65 °C. <sup>1</sup>H NMR (400 MHz, CDCl<sub>3</sub>) δ 7.62 (d, *J* = 8.0 Hz, 1H), 7.49 (s, 1H), 7.38 – 7.29 (m, 4H), 7.22 (t, *J* = 7.6 Hz, 1H), 7.15 (t, *J* = 7.8 Hz, 3H), 5.35 (s, 2H), 4.82 (s, 1H), 4.45 – 4.28 (m, 2H), 2.29 (s, 3H), 1.34 (t, *J* = 7.1 Hz, 3H); <sup>13</sup>C NMR (101 MHz, CDCl<sub>3</sub>) δ 204.6, 170.4, 136.9, 136.9, 128.8, 128.2, 127.8, 126.8, 125.9, 122.3, 120.6, 120.2, 110.8, 110.0, 82.2, 62.7, 50.3, 24.9, 14.0; HRMS calcd for  $C_{21}H_{21}NO_4Na$  ( $M+Na$ )<sup>+</sup> 374.1363, found 374.1365.

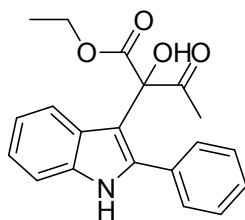

**ethyl 2-hydroxy-3-oxo-2-(2-phenyl-1H-indol-3-yl)butanoate (3ra)**

Yellow solid: m.p. 107-108 °C. <sup>1</sup>H NMR (400 MHz, CDCl<sub>3</sub>) δ 7.63 – 7.55 (m, 3H), 7.54 – 7.46 (m, 1H), 7.38 – 7.26 (m, 3H), 7.05 – 6.96 (m, 1H), 6.84 (q, *J* = 7.1 Hz, 1H), 6.23 (d, *J* = 7.1 Hz, 1H), 4.99 (s, 0.5H), 4.81 (s, 0.5H), 4.13 – 3.91 (m, 2H), 2.21 (s, 1.5H), 2.19 (s, 1.5H), 1.07 (t, *J* = 7.1 Hz, 1.5H), 0.94 (t, *J* = 7.1 Hz, 1.5H); <sup>13</sup>C NMR (101 MHz, CDCl<sub>3</sub>) δ 203.1, 199.1, 198.6, 198.5, 168.0, 166.0, 160.2, 159.9, 137.4, 137.4, 137.0, 136.9, 136.8, 128.6, 128.5, 127.8, 127.7, 125.1, 125.0, 124.9, 124.9, 119.0, 119.0, 118.7, 111.6, 111.3, 70.2, 70.0, 65.3, 62.6, 61.6, 61.4, 32.7, 30.0, 13.4, 13.1; HRMS calcd for  $C_{20}H_{19}NO_4Na$  ( $M+Na$ )<sup>+</sup> 360.1206, found 360.1213.

### 3. Characterization Data of Compounds 4ab-4ah:

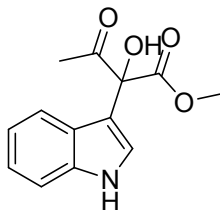

**methyl 2-hydroxy-2-(1H-indol-3-yl)-3-oxobutanoate (4ab)**

White solid: m.p. 112-113 °C.  $^1\text{H}$  NMR (400 MHz,  $\text{CDCl}_3$ )  $\delta$  8.43 (s, 1H), 7.55 (d,  $J = 8.0$  Hz, 1H), 7.39 – 7.29 (m, 2H), 7.22 (t,  $J = 7.6$  Hz, 1H), 7.14 (t,  $J = 7.5$  Hz, 1H), 4.88 (s, 1H), 3.88 (s, 3H), 2.28 (s, 3H);  $^{13}\text{C}$  NMR (101 MHz,  $\text{CDCl}_3$ )  $\delta$  204.8, 170.8, 136.5, 124.95, 124.3, 122.6, 120.5, 120.0, 111.6, 111.6, 82.3, 53.4, 25.0; HRMS calcd for  $\text{C}_{13}\text{H}_{13}\text{NO}_4\text{Na}$  ( $\text{M}+\text{Na}$ ) $^+$  270.0737, found 270.0745.

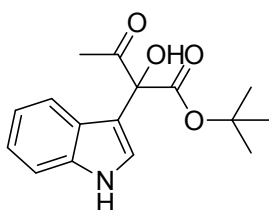

**tert-butyl 2-hydroxy-2-(1H-indol-3-yl)-3-oxobutanoate (4ac)**

White solid: m.p. 119-120 °C.  $^1\text{H}$  NMR (400 MHz,  $\text{CDCl}_3$ )  $\delta$  8.40 (s, 1H), 7.60 (d,  $J = 7.9$  Hz, 1H), 7.37 (s, 1H), 7.31 (d,  $J = 8.1$  Hz, 1H), 7.20 (t,  $J = 7.5$  Hz, 1H), 7.12 (t,  $J = 7.4$  Hz, 1H), 4.75 (s, 1H), 2.24 (s, 3H), 1.54 (s, 9H);  $^{13}\text{C}$  NMR (101 MHz,  $\text{CDCl}_3$ )  $\delta$  205.0, 169.5, 136.5, 125.2, 124.1, 122.4, 120.5, 120.2, 112.1, 111.5, 84.2, 82.4, 27.9, 25.1; HRMS calcd for  $\text{C}_{16}\text{H}_{19}\text{NO}_4\text{Na}$  ( $\text{M}+\text{Na}$ ) $^+$  312.1206, found 312.1219.

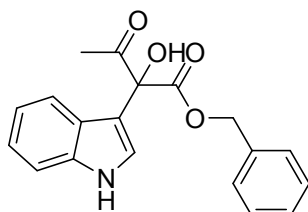

**benzyl 2-hydroxy-2-(1H-indol-3-yl)-3-oxobutanoate (4ad)**

White solid: m.p. 93-94 °C.  $^1\text{H}$  NMR (400 MHz,  $\text{CDCl}_3$ )  $\delta$  8.33 (s, 1H), 7.52 (d,  $J = 8.0$  Hz, 1H), 7.36 (s, 5H), 7.33 – 7.29 (m, 2H), 7.20 (t,  $J = 7.6$  Hz, 1H), 7.09 (t,  $J = 7.5$  Hz, 1H), 5.33 (q,  $J = 12.2$  Hz, 2H), 4.87 (s, 1H), 2.22 (s, 3H);  $^{13}\text{C}$  NMR (101 MHz,  $\text{CDCl}_3$ )  $\delta$  204.7, 170.1, 136.5, 134.9, 128.7, 128.7, 128.5, 125.1, 124.4, 122.7, 120.5, 120.2, 111.6, 111.6, 82.4, 68.2, 25.1; HRMS calcd for  $\text{C}_{19}\text{H}_{17}\text{NO}_4\text{Na}$  ( $\text{M}+\text{Na}$ ) $^+$  346.1050, found 346.1052.

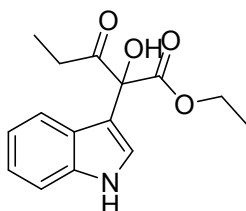

**ethyl 2-hydroxy-2-(1H-indol-3-yl)-3-oxopentanoate (4ae)**



White solid: m.p. 96-97 °C. <sup>1</sup>H NMR (400 MHz, CDCl<sub>3</sub>) δ 8.39 (s, 1H), 7.56 (d, *J* = 8.0 Hz, 1H), 7.41 (s, 1H), 7.34 (d, *J* = 8.1 Hz, 1H), 7.21 (t, *J* = 7.6 Hz, 1H), 7.12 (t, *J* = 7.5 Hz, 1H), 4.87 (s, 1H), 4.45 – 4.24 (m, 2H), 2.80 – 2.67 (m, 1H), 2.58 – 2.46 (m, 1H), 1.33 (t, *J* = 7.1 Hz, 3H), 1.02 (t, *J* = 7.2 Hz, 3H); <sup>13</sup>C NMR (101 MHz, CDCl<sub>3</sub>) δ 207.8, 170.1, 136.2, 124.8, 124.2, 122.1, 119.9, 119.7, 111.4, 111.4, 81.7, 62.4, 30.3, 13.7, 7.7; HRMS calcd for C<sub>15</sub>H<sub>17</sub>NO<sub>4</sub>Na (M+Na)<sup>+</sup> 298.1050, found 298.1064.

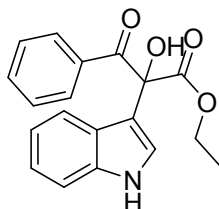

**ethyl 2-hydroxy-2-(1H-indol-3-yl)-3-oxo-3-phenylpropanoate (4af)**

White solid: m.p. 124-125 °C. <sup>1</sup>H NMR (400 MHz, CDCl<sub>3</sub>) δ 8.29 (s, 1H), 8.08 (d, *J* = 8.0 Hz, 2H), 7.61 (d, *J* = 8.0 Hz, 1H), 7.50 (s, 1H), 7.47 (t, *J* = 7.5 Hz, 1H), 7.32 (t, *J* = 7.1 Hz, 3H), 7.17 (t, *J* = 7.6 Hz, 1H), 7.08 (t, *J* = 7.5 Hz, 1H), 5.09 (s, 1H), 4.40 – 4.19 (m, 2H), 1.20 (t, *J* = 7.1 Hz, 3H); <sup>13</sup>C NMR (101 MHz, CDCl<sub>3</sub>) δ 195.2, 171.1, 136.1, 133.3, 133.2, 130.0, 127.9, 125.3, 123.9, 122.2, 120.4, 120.0, 113.0, 111.1, 81.0, 62.6, 13.6; HRMS calcd for C<sub>19</sub>H<sub>17</sub>NO<sub>4</sub>Na (M+Na)<sup>+</sup> 346.1050, found 346.1056.

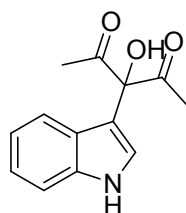

**3-hydroxy-3-(1H-indol-3-yl)pentane-2,4-dione (4ah)**

White solid: m.p. 107-108 °C. <sup>1</sup>H NMR (400 MHz, CDCl<sub>3</sub>) δ 8.39 (s, 1H), 7.53 (d, *J* = 8.0 Hz, 1H), 7.38 (d, *J* = 8.2 Hz, 1H), 7.33 (d, *J* = 2.7 Hz, 1H), 7.27 – 7.21 (m, 1H), 7.18 – 7.11 (m, 1H), 5.36 (s, 1H), 2.36 (s, 6H); <sup>13</sup>C NMR (101 MHz, CDCl<sub>3</sub>) δ 207.3, 136.6, 124.8, 123.7, 122.8, 120.7, 119.8, 112.5, 111.6, 87.3, 26.2; HRMS calcd for C<sub>13</sub>H<sub>13</sub>NO<sub>3</sub>Na (M+Na)<sup>+</sup> 254.0788, found 254.0794.

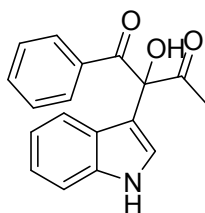

**2-hydroxy-2-(1H-indol-3-yl)-1-phenylbutane-1,3-dione (4ai)**

White solid: m.p. 154-155 °C. <sup>1</sup>H NMR (400 MHz, CDCl<sub>3</sub>) δ 8.34 (s, 1H), 8.12 (d, *J* = 7.9 Hz, 2H), 7.56 (d, *J* = 8.0 Hz, 1H), 7.50 (t, *J* = 7.3 Hz, 1H), 7.41 – 7.29 (m, 3H), 7.26 – 7.18 (m, 2H), 7.12 (t, *J* = 7.5 Hz, 1H), 5.57 (s, 1H), 2.35 (s, 3H); <sup>13</sup>C NMR (101 MHz, CDCl<sub>3</sub>) δ 207.3, 198.0, 136.4, 134.2, 133.5, 130.9, 128.1, 124.9, 123.7, 122.9, 120.7, 120.1, 113.8, 111.5, 85.2, 26.6; HRMS calcd for C<sub>18</sub>H<sub>15</sub>NO<sub>3</sub>Na (M+Na)<sup>+</sup> 316.0944, found 316.0947.

#### 4. Characterization Data of Compounds 6aa and 6ba:

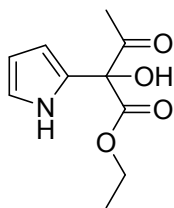

##### ethyl 2-hydroxy-3-oxo-2-(1H-pyrrol-2-yl)butanoate (6aa)

Colourless oil.  $^1\text{H}$  NMR (400 MHz,  $\text{CDCl}_3$ )  $\delta$  8.98 (s, 1H), 6.83 (s, 1H), 6.39 (s, 1H), 6.24 (s, 1H), 4.81 (s, 1H), 4.36 (q,  $J = 6.8$  Hz, 2H), 2.34 (s, 3H), 1.37 (t,  $J = 7.1$  Hz, 3H);  $^{13}\text{C}$  NMR (101 MHz,  $\text{CDCl}_3$ )  $\delta$  202.8, 169.4, 125.6, 118.5, 109.2, 108.1, 81.4, 63.2, 24.4, 14.0; HRMS calcd for  $\text{C}_{10}\text{H}_{13}\text{NO}_4\text{Na}$  ( $\text{M}+\text{Na}$ ) $^+$  234.0737, found 234.0730.

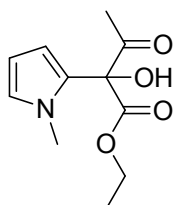

##### ethyl 2-hydroxy-2-(1-methyl-1H-pyrrol-2-yl)-3-oxobutanoate (6ba)

Colourless oil.  $^1\text{H}$  NMR (400 MHz,  $\text{CDCl}_3$ )  $\delta$  6.65 (s, 1H), 6.15 (s, 1H), 6.10 (t,  $J = 3.0$  Hz, 1H), 4.50 (s, 1H), 4.39 (qd,  $J = 7.0, 2.8$  Hz, 2H), 3.53 (s, 3H), 2.35 (s, 3H), 1.39 (t,  $J = 7.1$  Hz, 3H);  $^{13}\text{C}$  NMR (101 MHz,  $\text{CDCl}_3$ )  $\delta$  203.1, 168.4, 125.8, 124.5, 109.8, 106.2, 81.2, 62.2, 34.3, 25.2, 13.2; HRMS calcd for  $\text{C}_{11}\text{H}_{15}\text{NO}_4\text{Na}$  ( $\text{M}+\text{Na}$ ) $^+$  248.0893, found 228.0887.

## 5. <sup>1</sup>H and <sup>13</sup>C NMR Spectra of Compounds 3aa-3oa

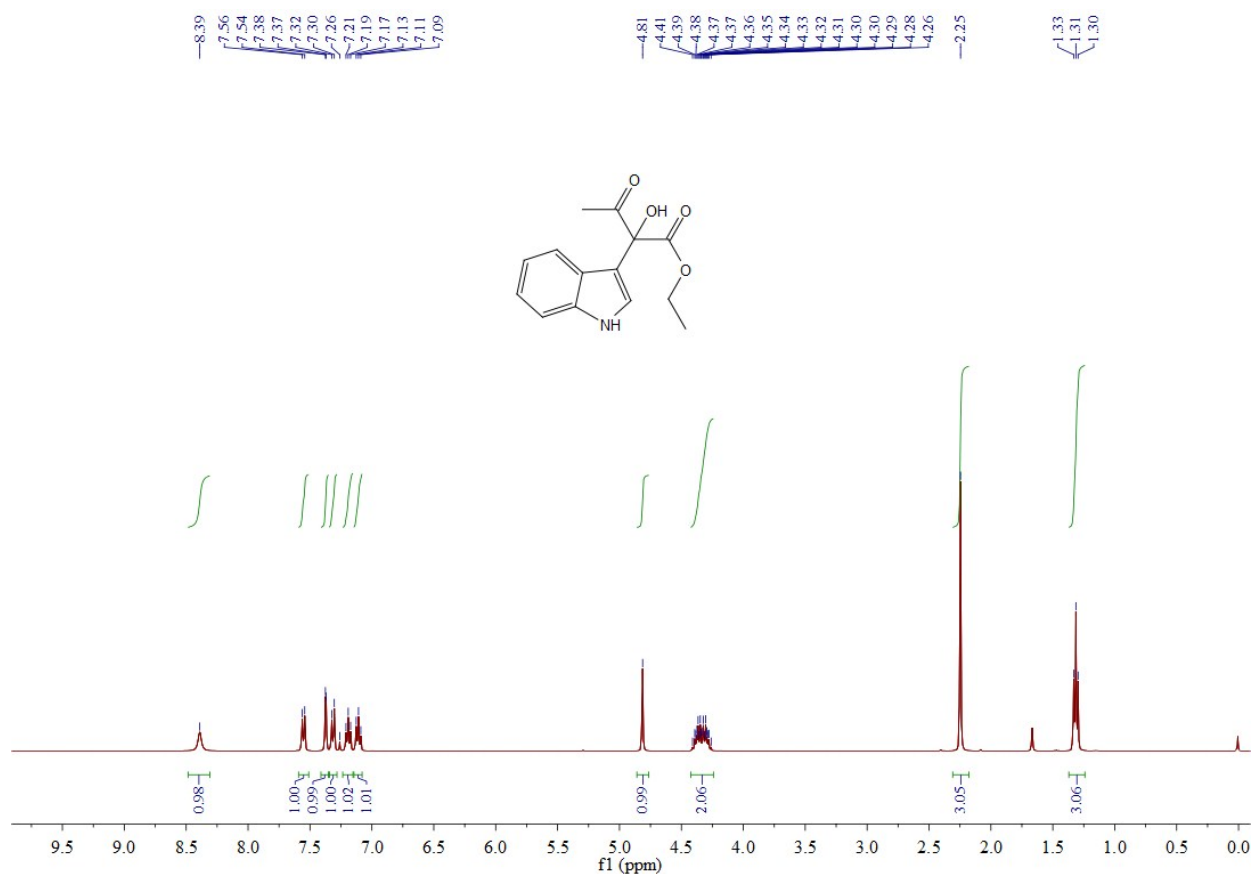

<sup>1</sup>H NMR of **3aa** in CDCl<sub>3</sub> at 297 K (δ in ppm).

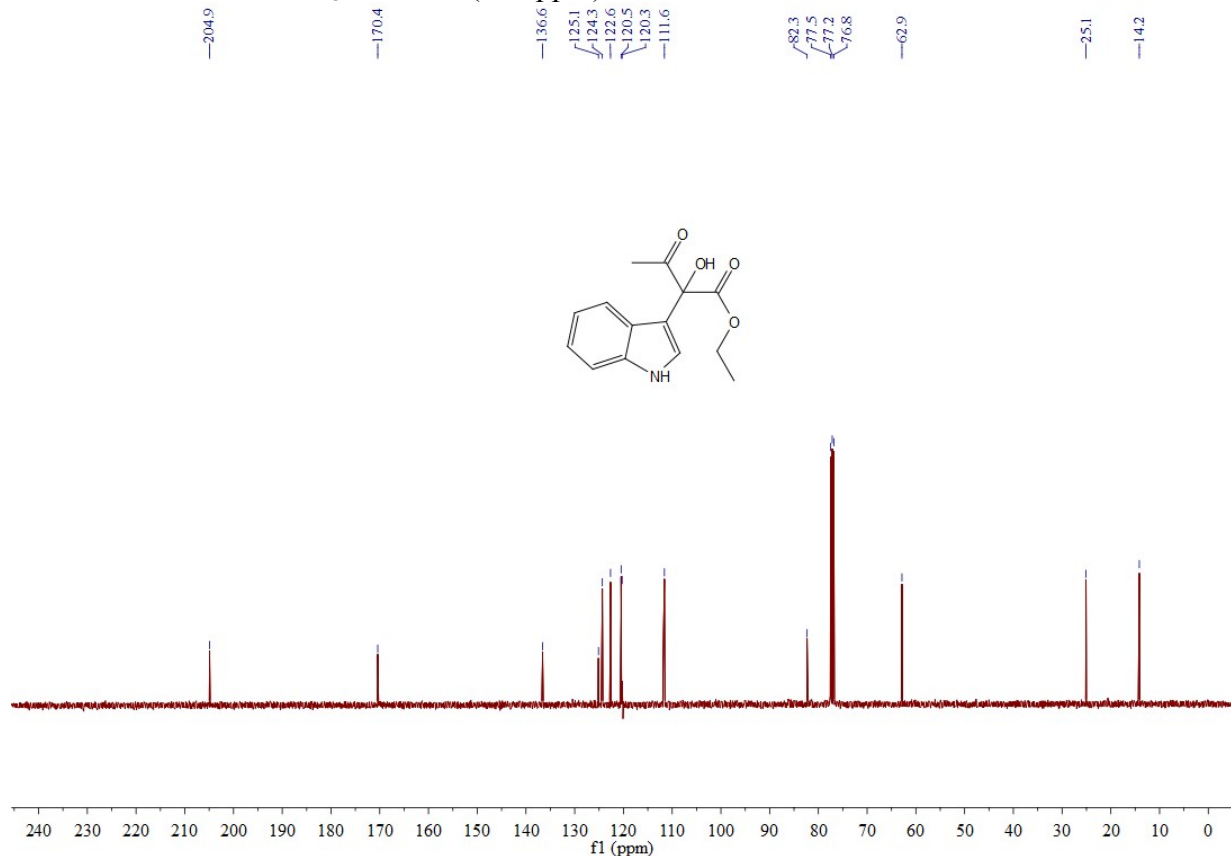

<sup>13</sup>C NMR of **3aa** in CDCl<sub>3</sub> at 299 K (δ in ppm).

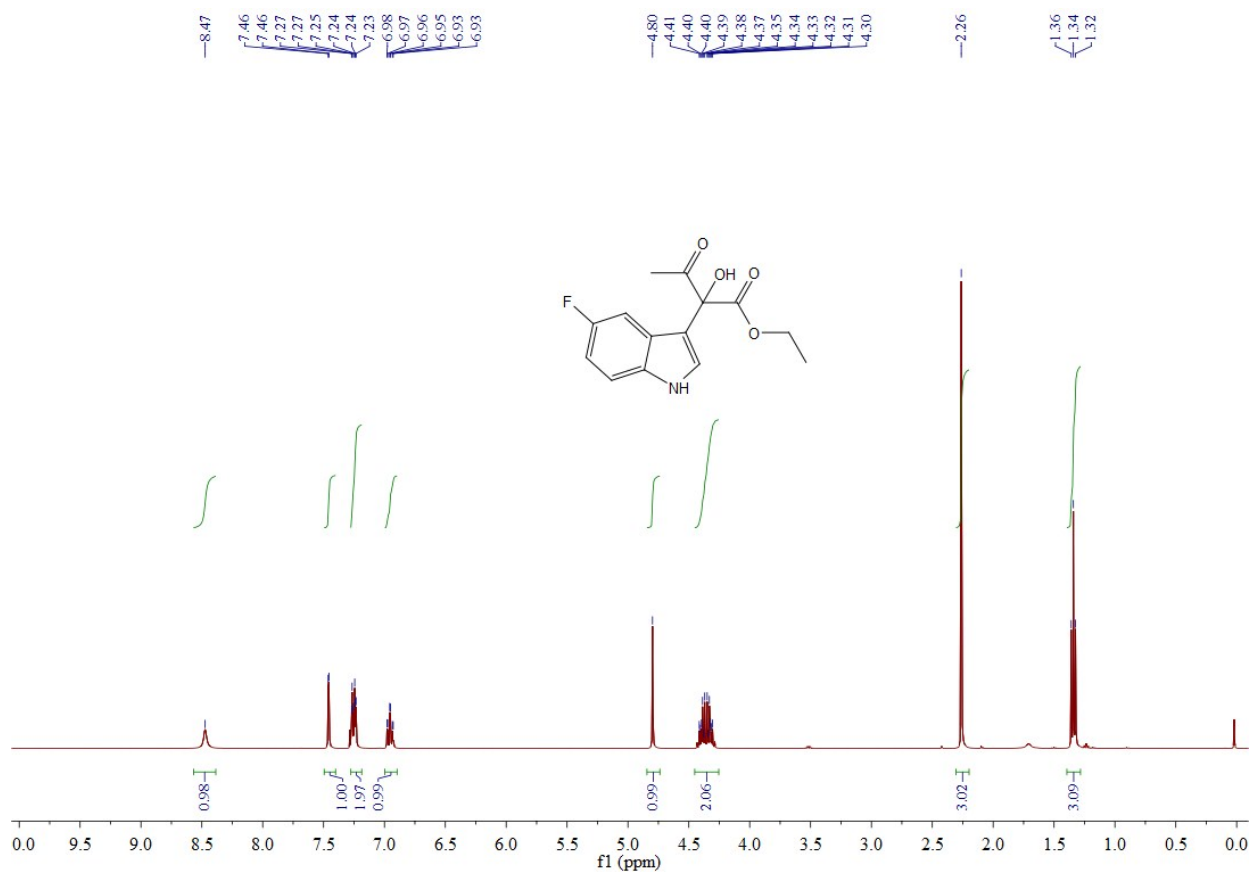

<sup>1</sup>H NMR of **3ba** in CDCl<sub>3</sub> at 297 K (δ in ppm).

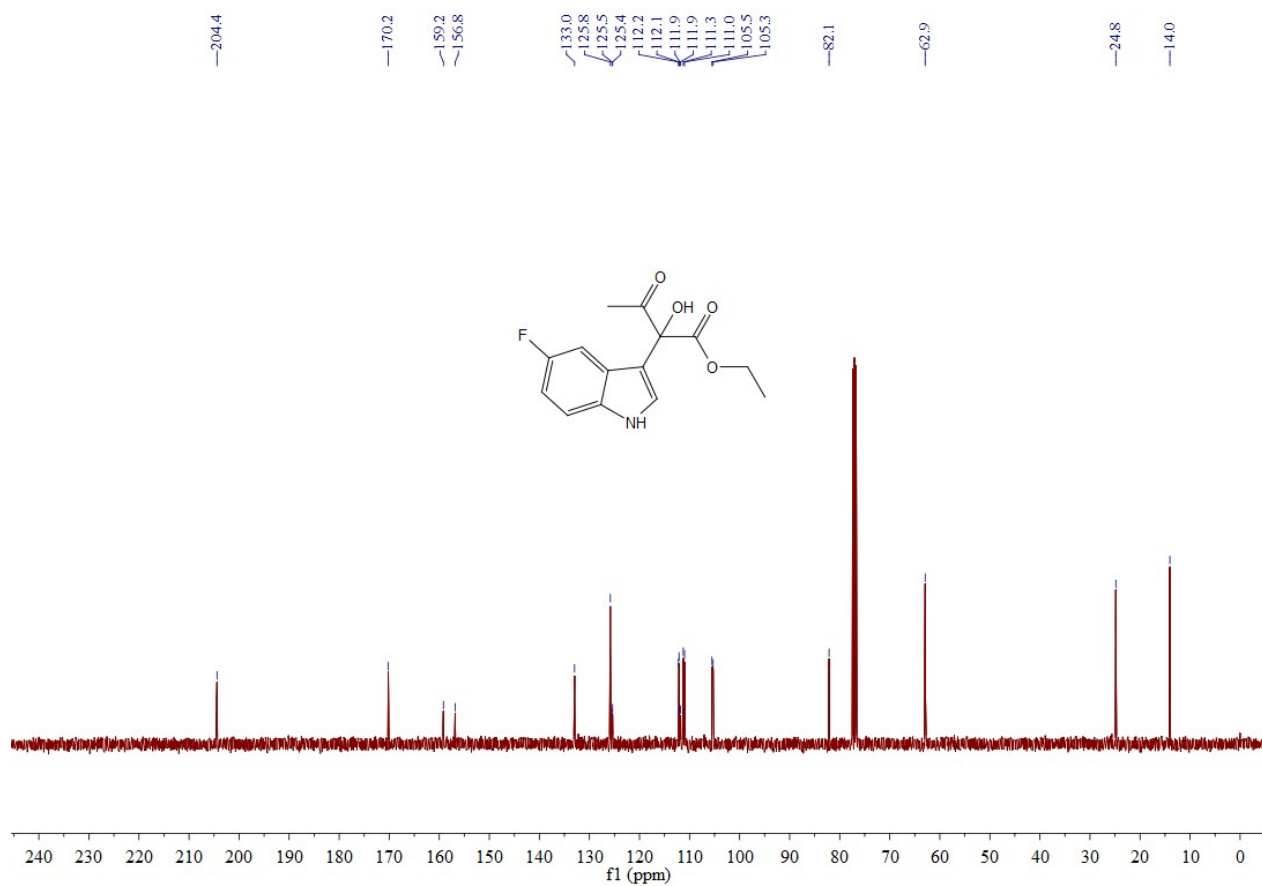

<sup>13</sup>C NMR of **3ba** in CDCl<sub>3</sub> at 299 K (δ in ppm).

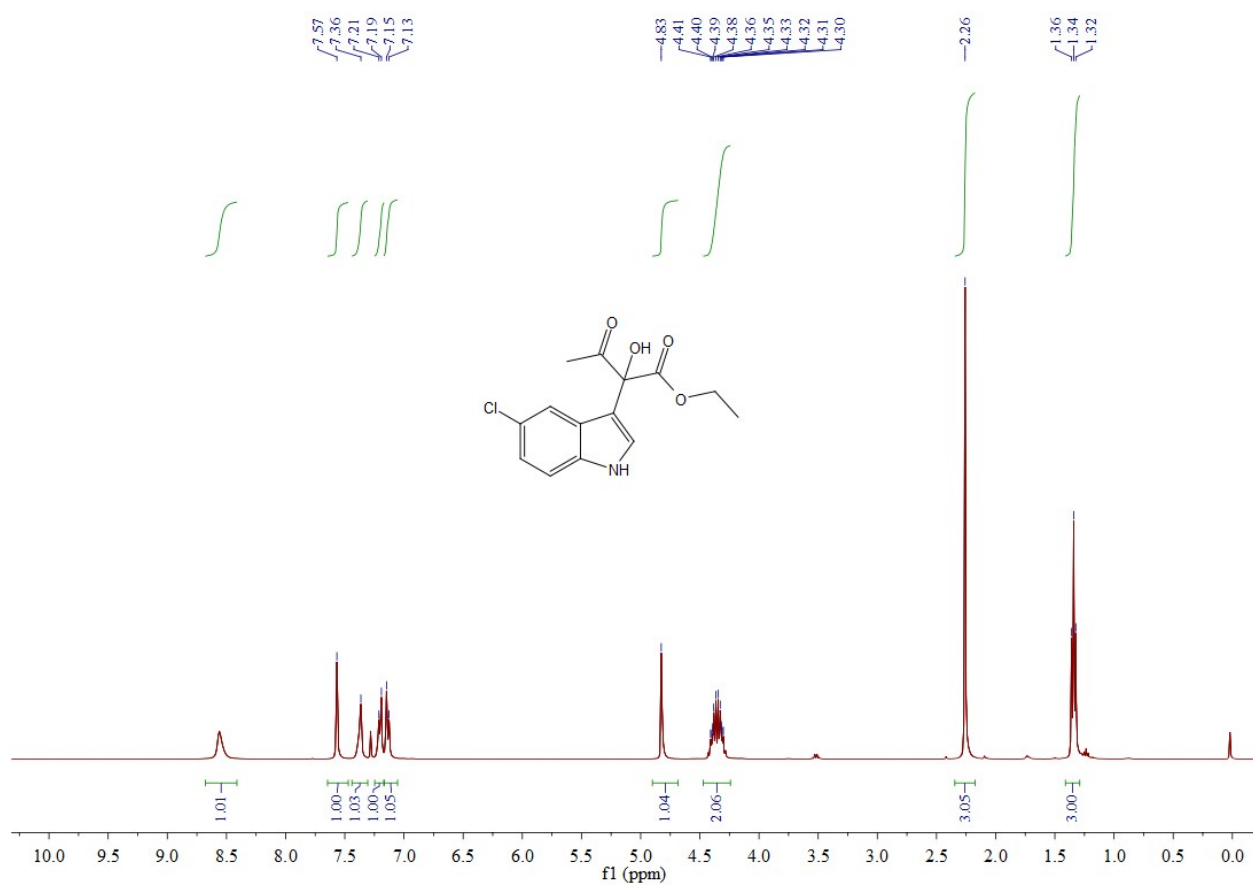

<sup>1</sup>H NMR of **3ca** in CDCl<sub>3</sub> at 297 K (δ in ppm).

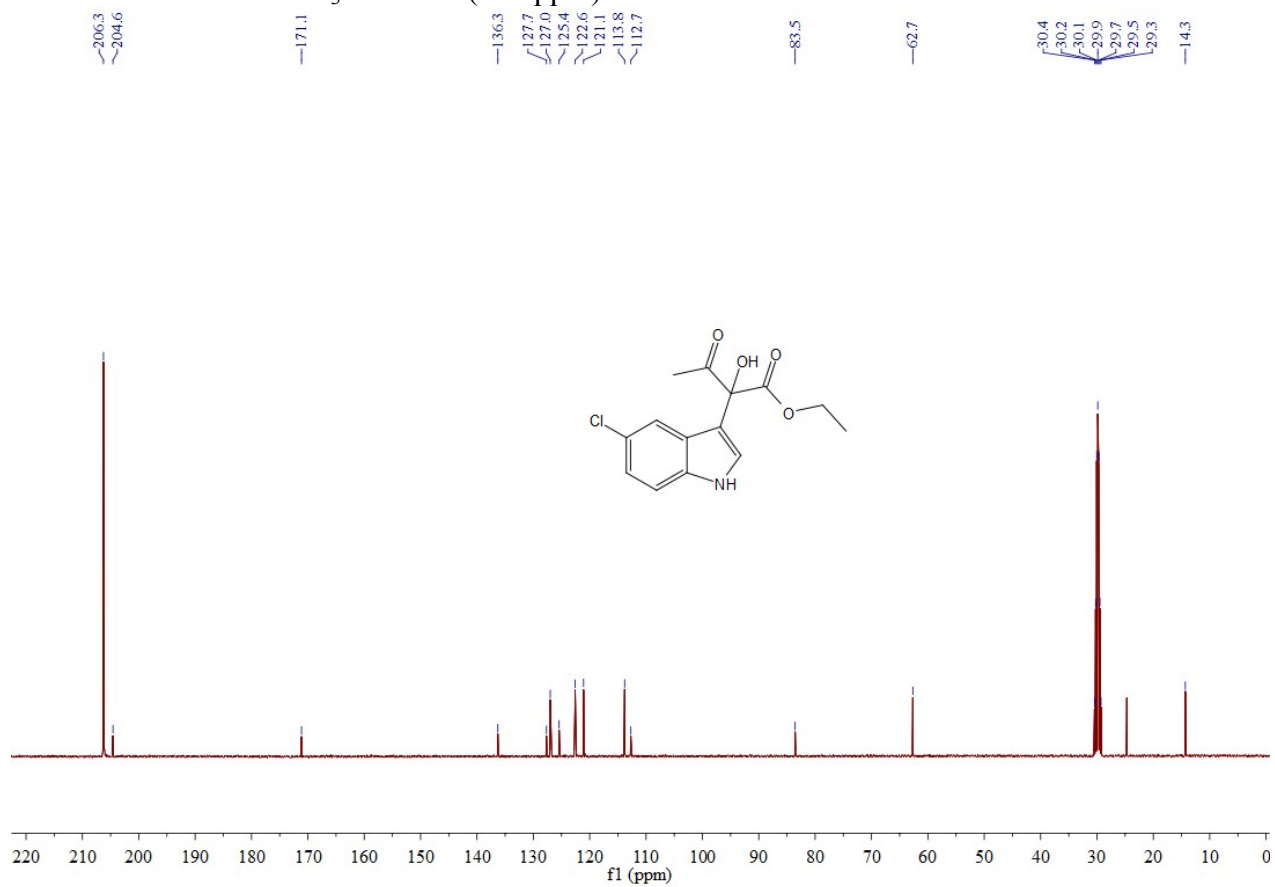

<sup>13</sup>C NMR of **3ca** in CDCl<sub>3</sub> at 299 K (δ in ppm).

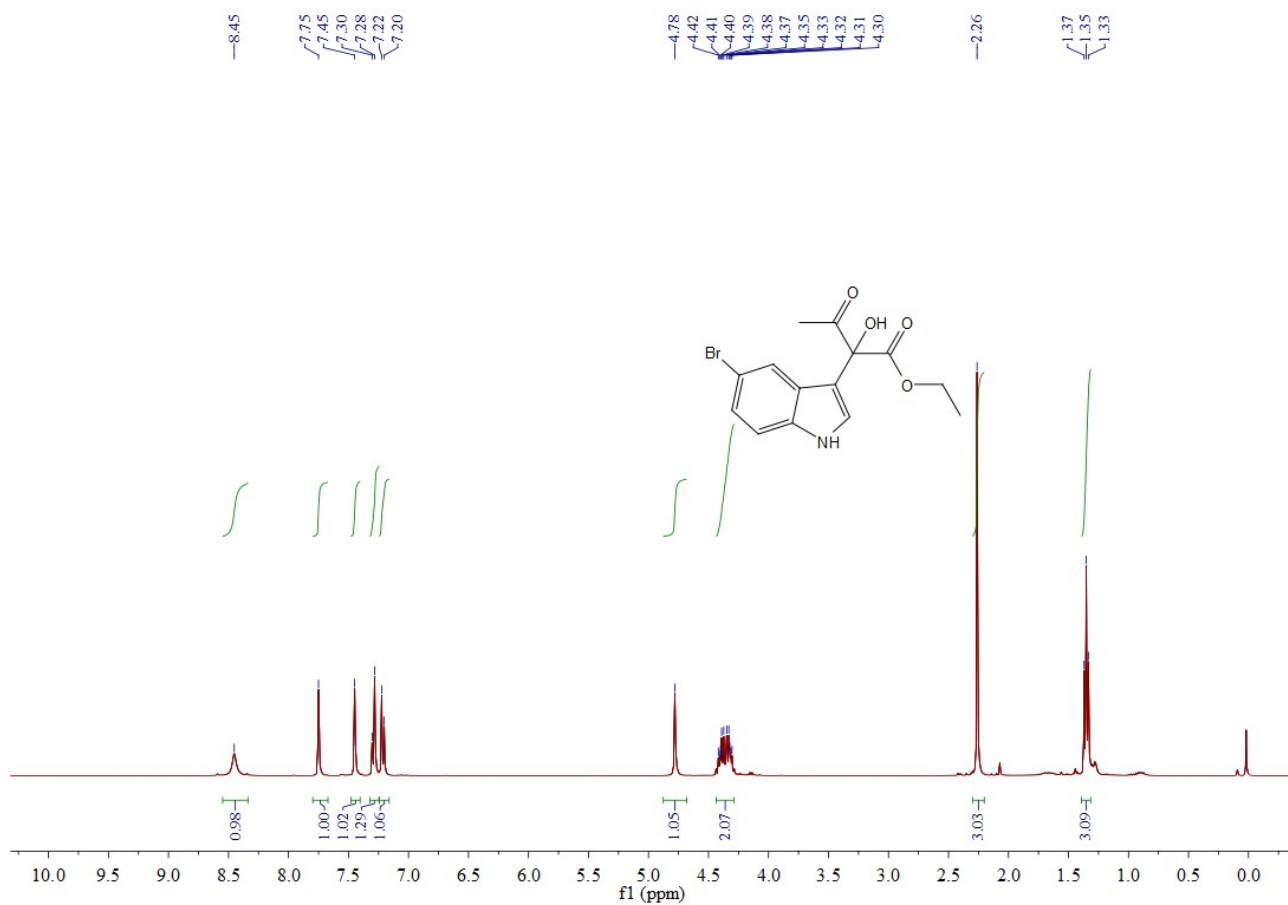

$^1\text{H}$  NMR of **3da** in  $\text{CDCl}_3$  at 297 K ( $\delta$  in ppm).

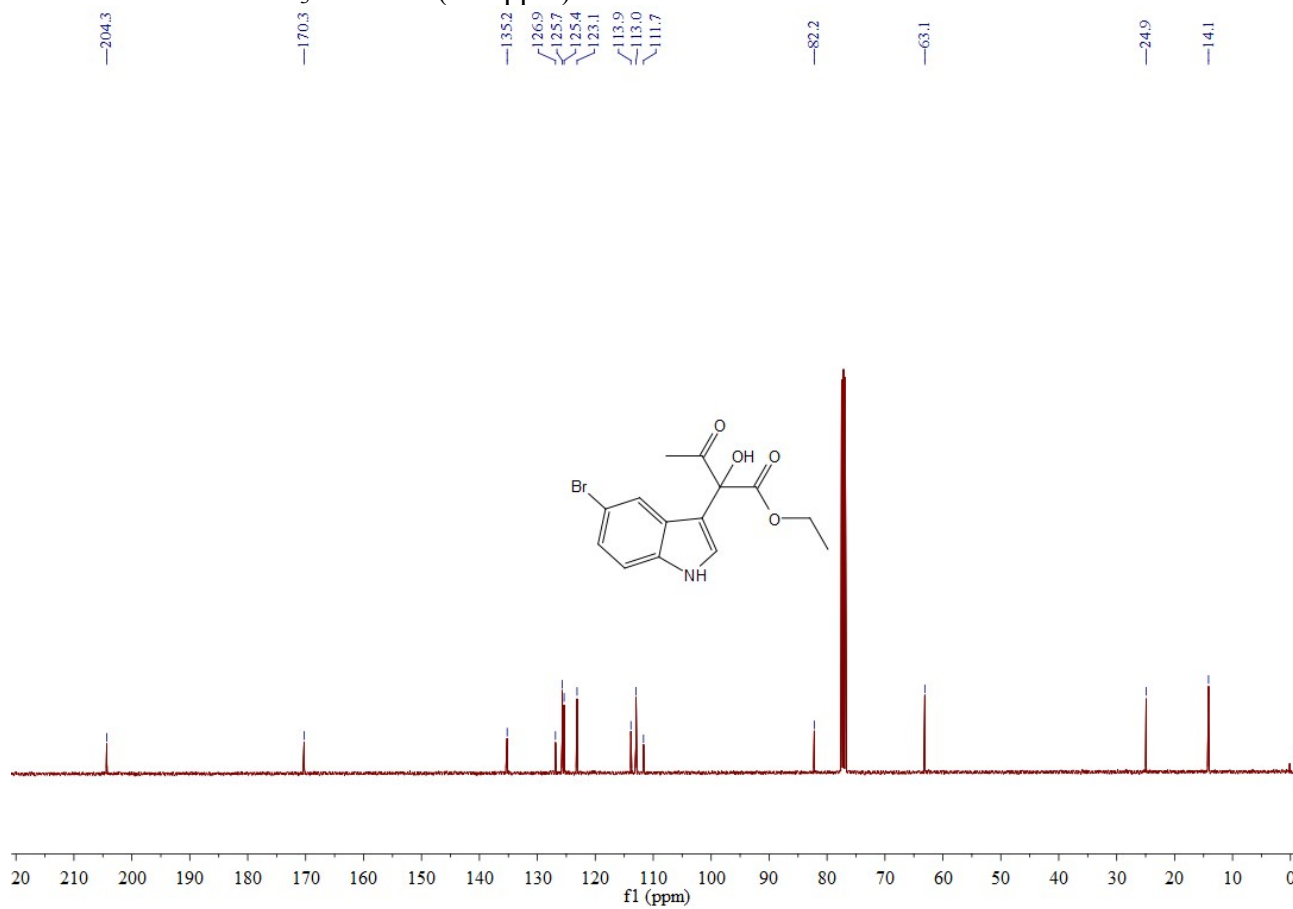

$^{13}\text{C}$  NMR of **3da** in  $\text{CDCl}_3$  at 299 K ( $\delta$  in ppm).

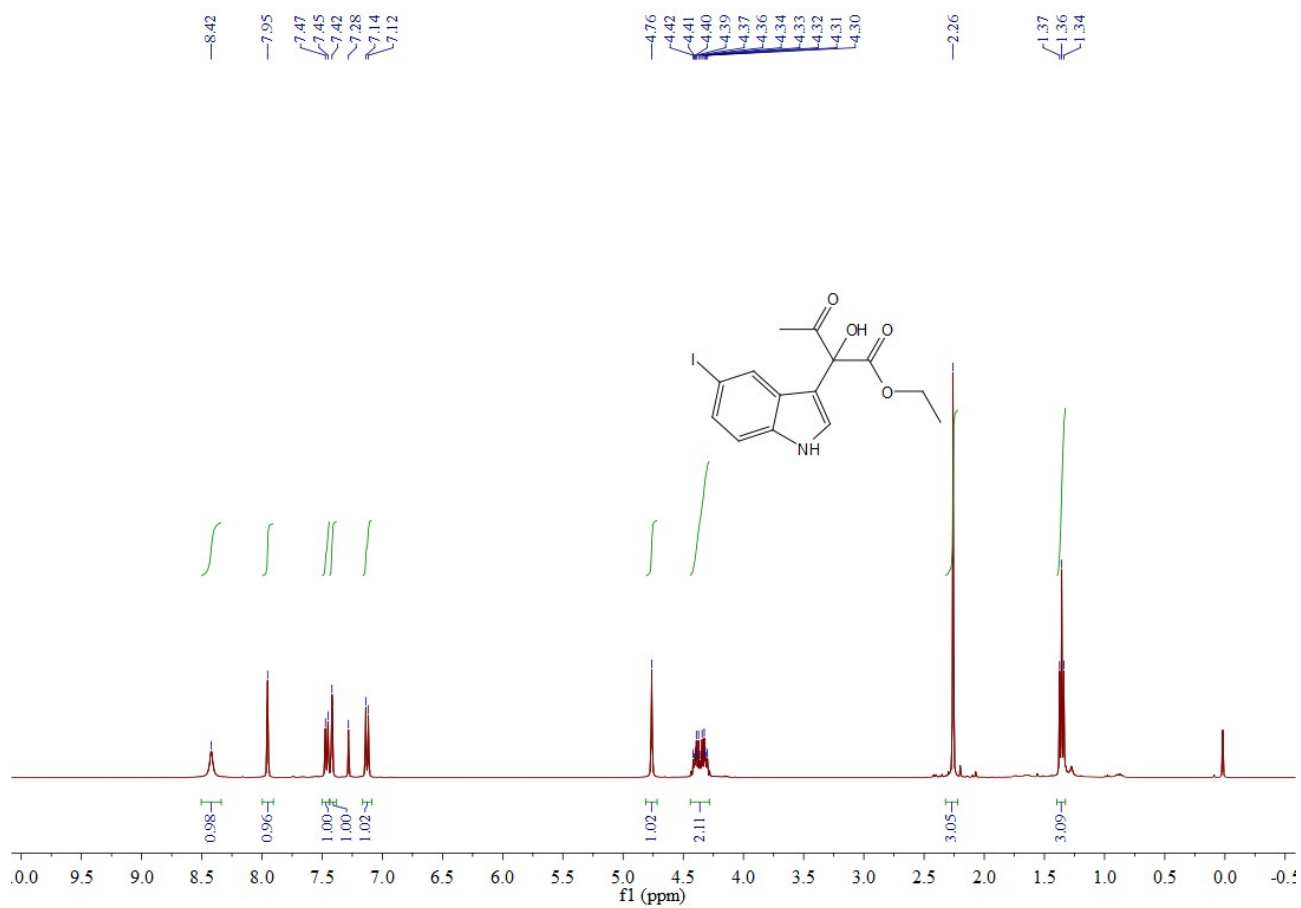

<sup>1</sup>H NMR of **3ea** in CDCl<sub>3</sub> at 297 K (δ in ppm).

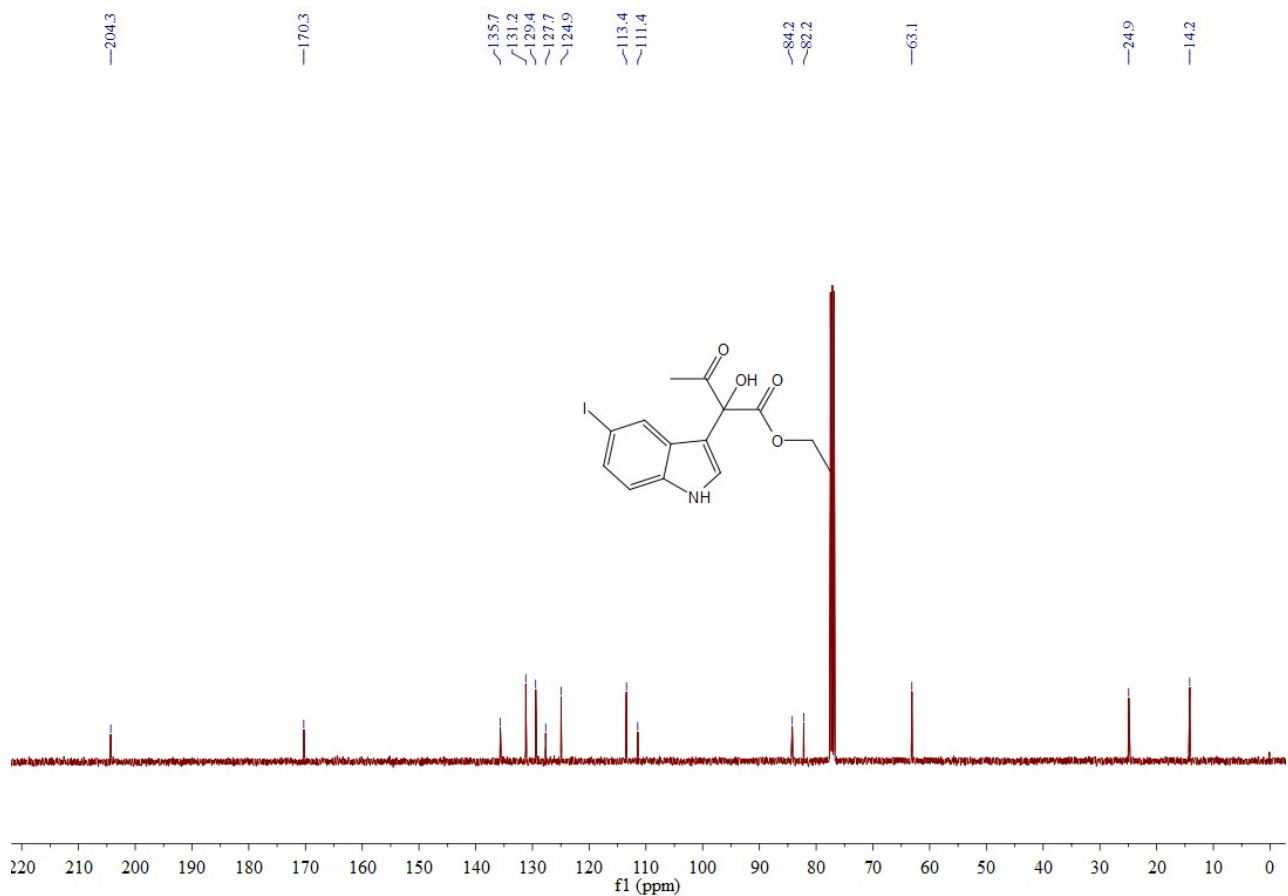

<sup>13</sup>C NMR of **3ea** in CDCl<sub>3</sub> at 299 K (δ in ppm).

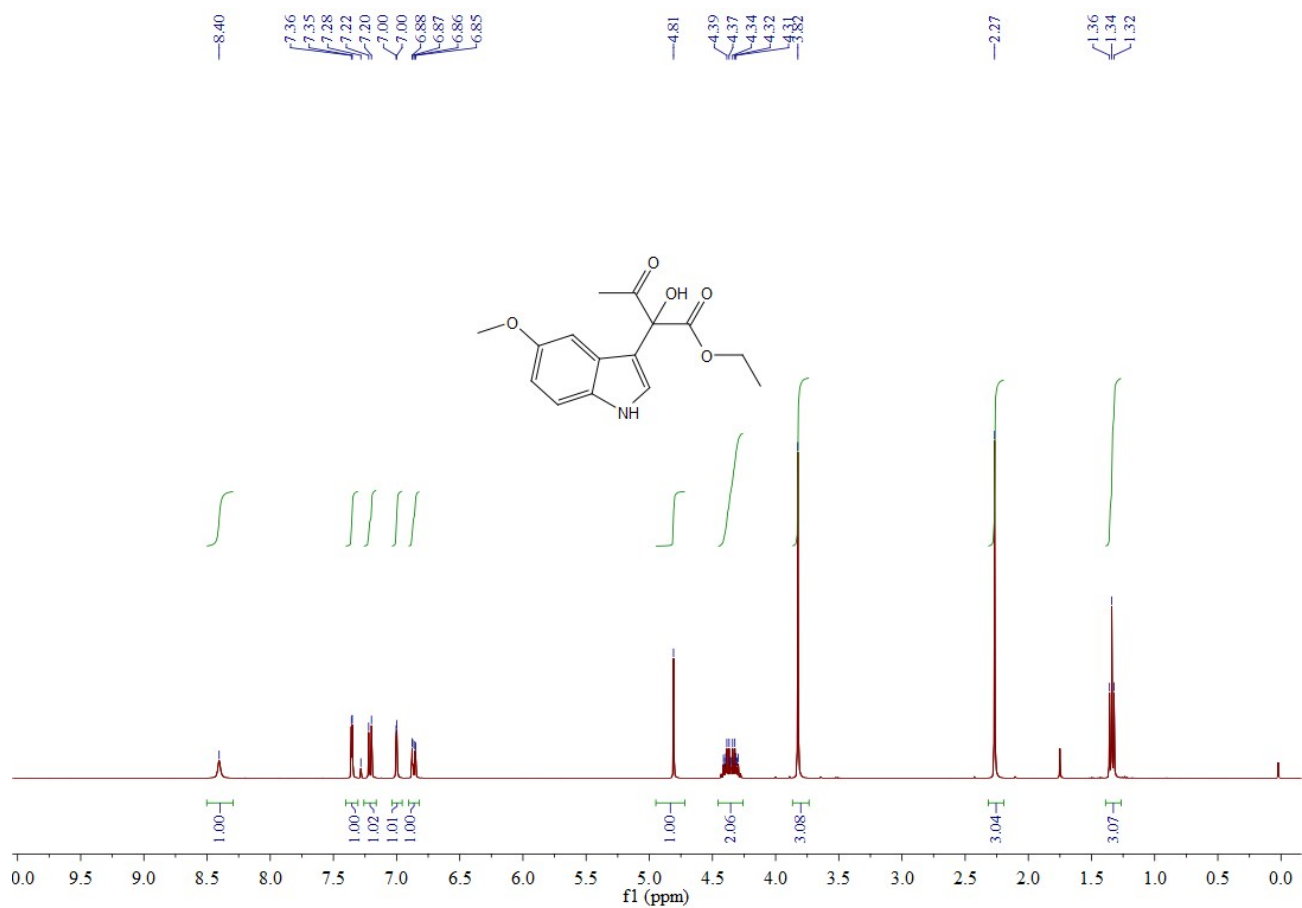

<sup>1</sup>H NMR of **3fa** in CDCl<sub>3</sub> at 297 K (δ in ppm).

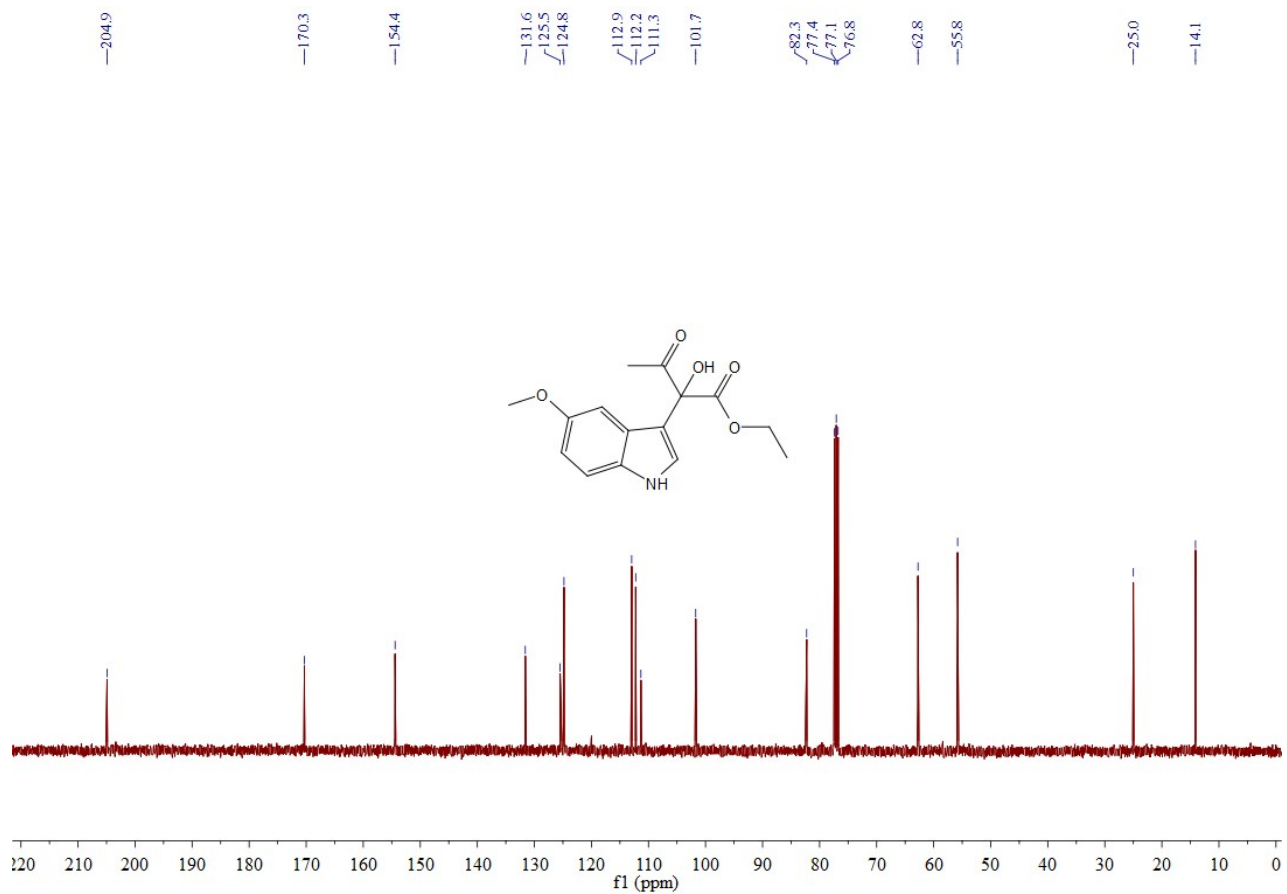

<sup>13</sup>C NMR of **3fa** in CDCl<sub>3</sub> at 299 K (δ in ppm).



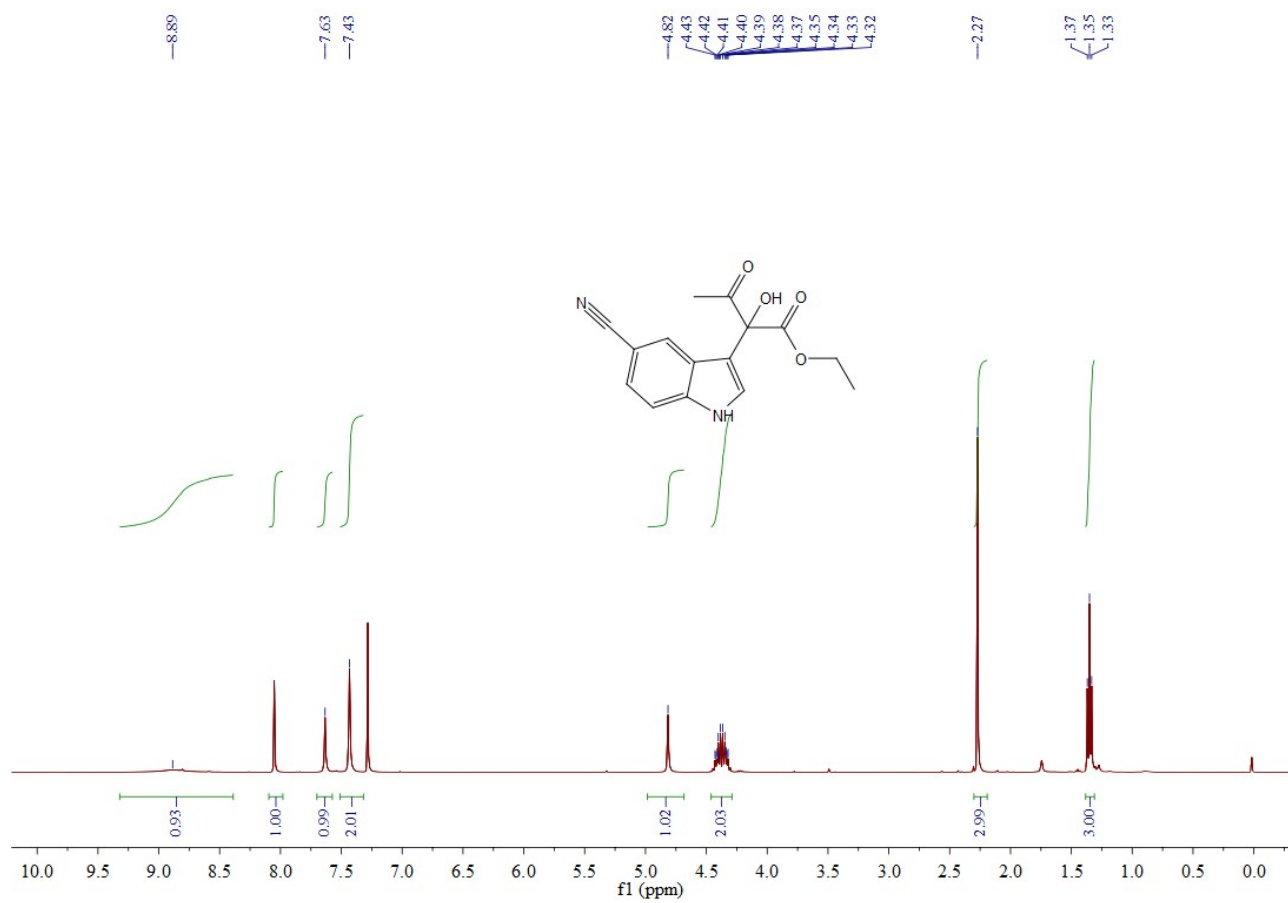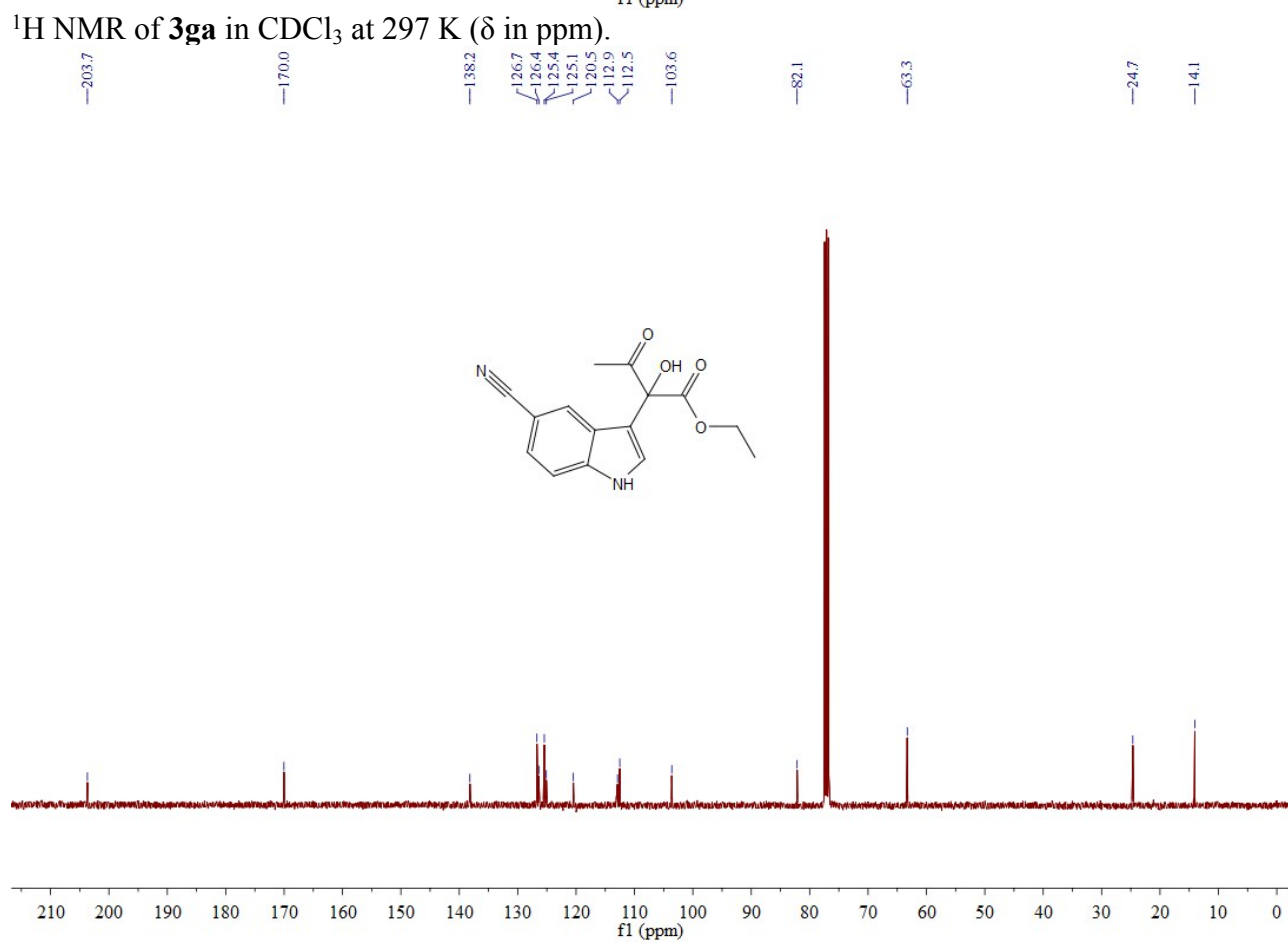

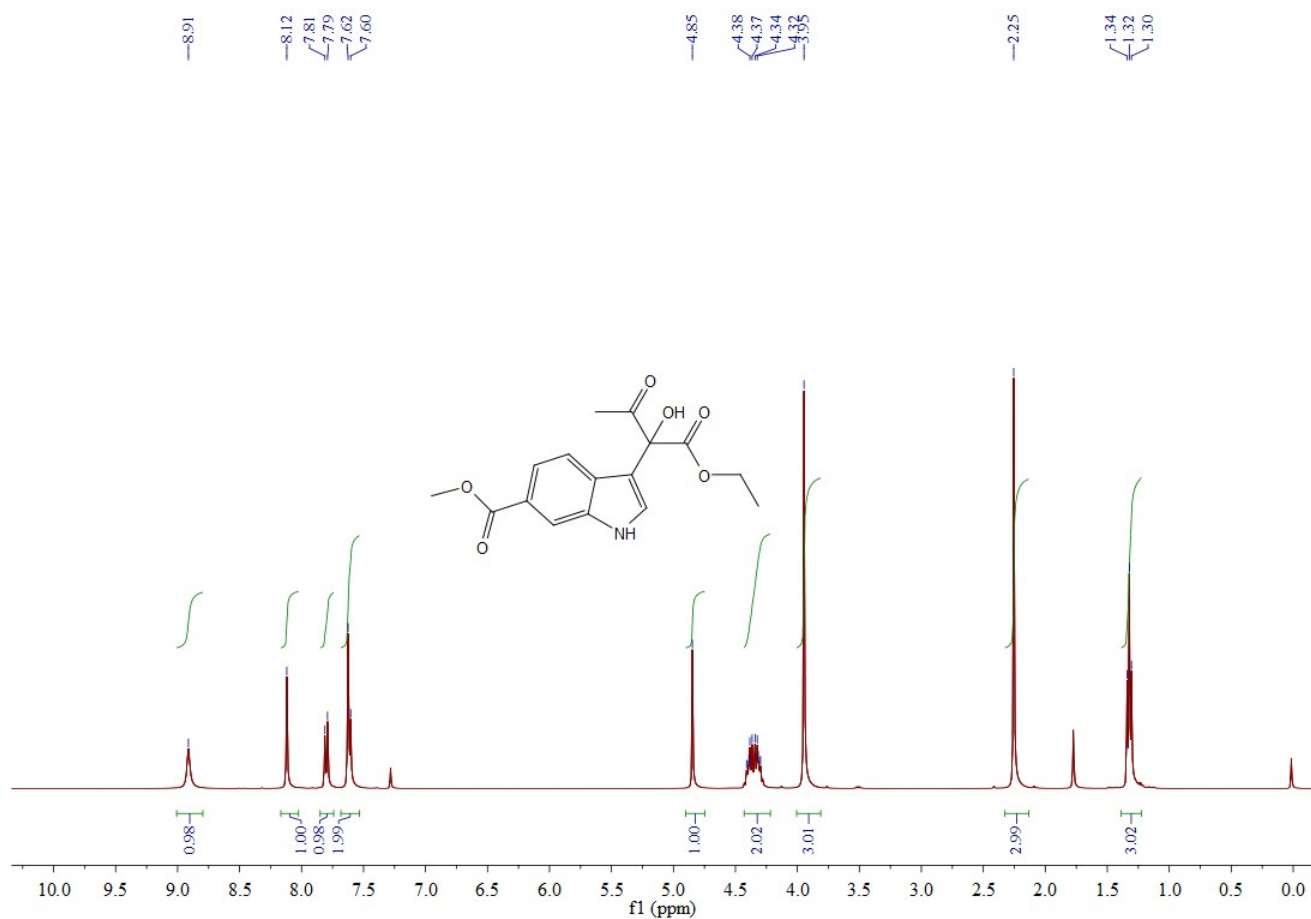

<sup>1</sup>H NMR of **3ha** in CDCl<sub>3</sub> at 297 K (δ in ppm).

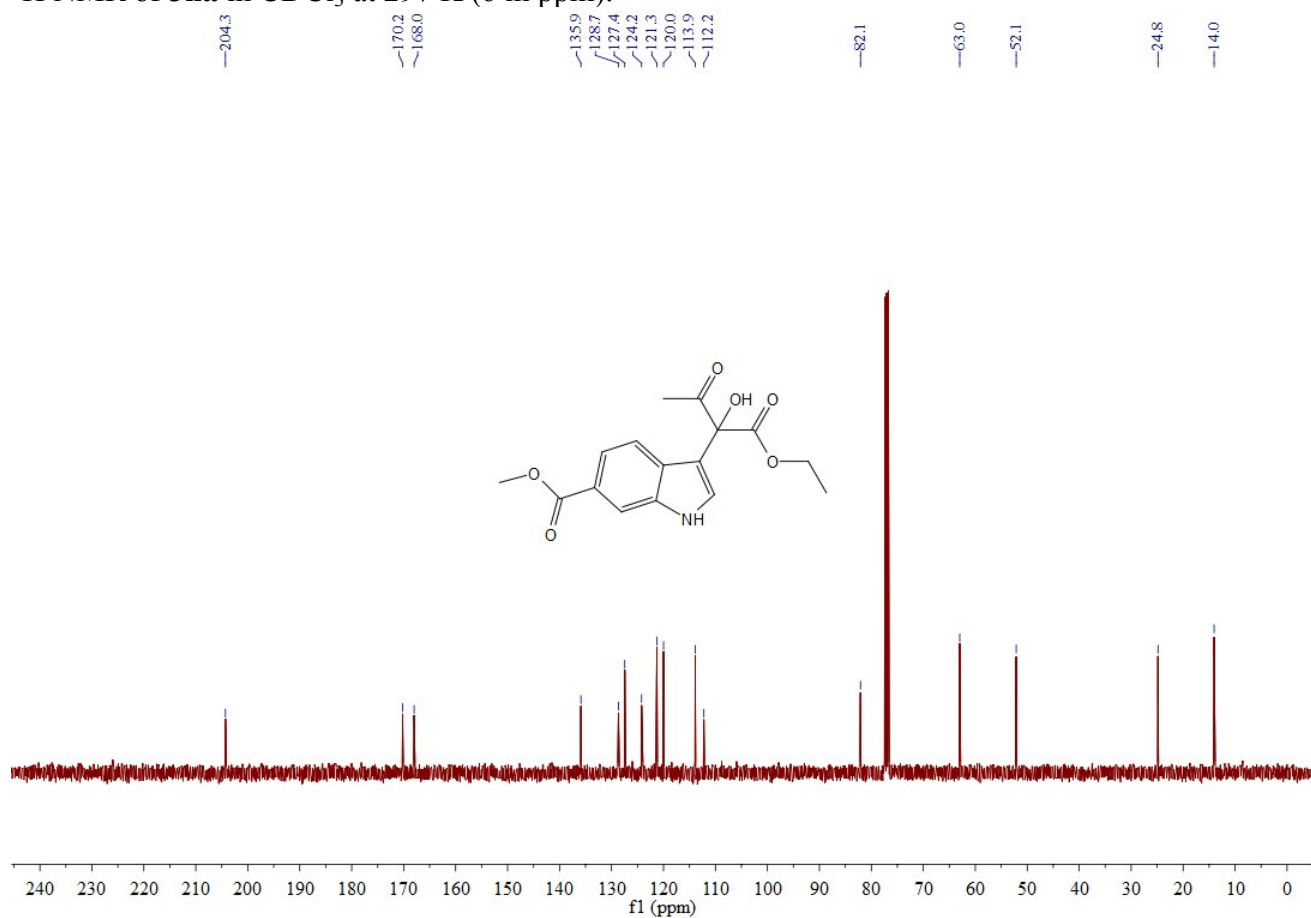

<sup>13</sup>C NMR of **3ha** in CDCl<sub>3</sub> at 299 K (δ in ppm).

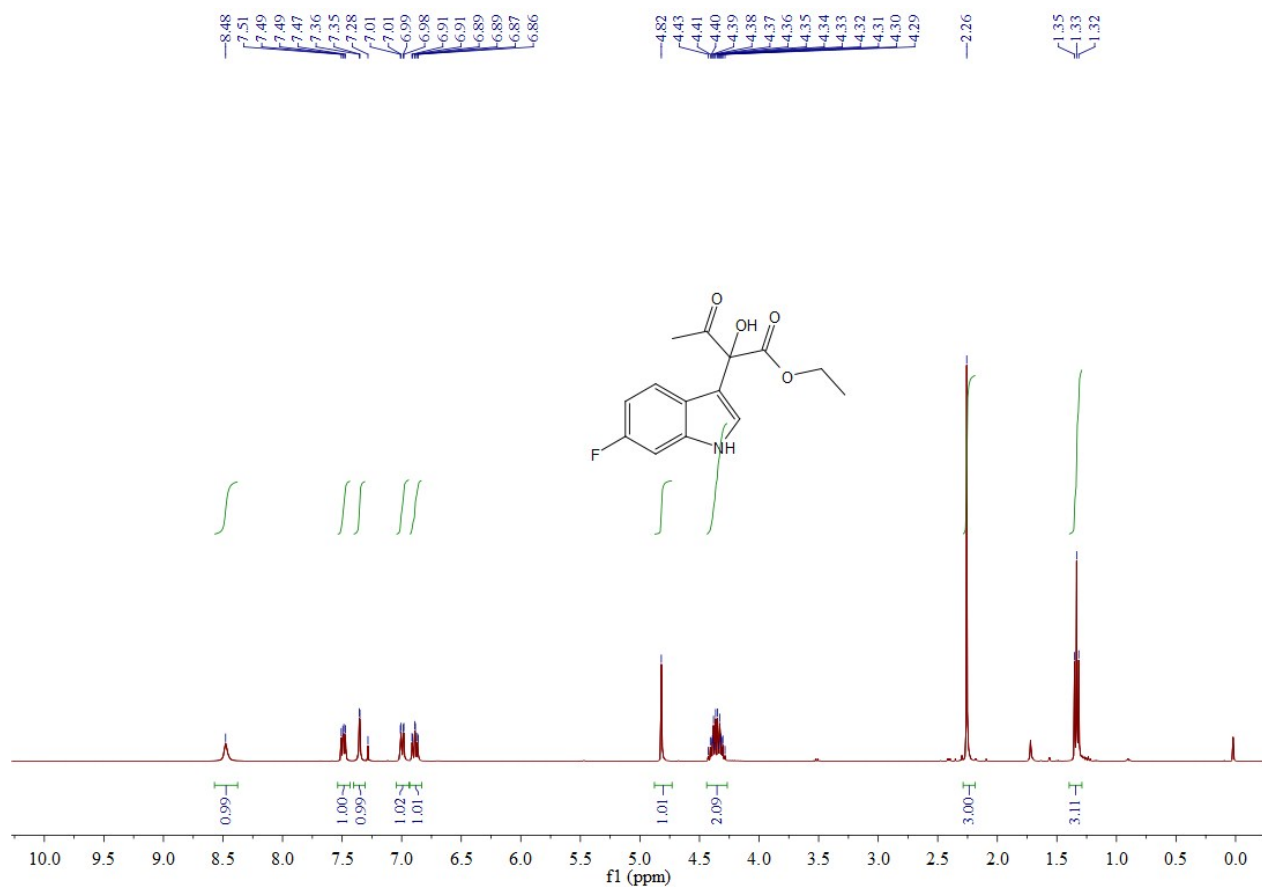

<sup>1</sup>H NMR of **3ia** in CDCl<sub>3</sub> at 297 K (δ in ppm).

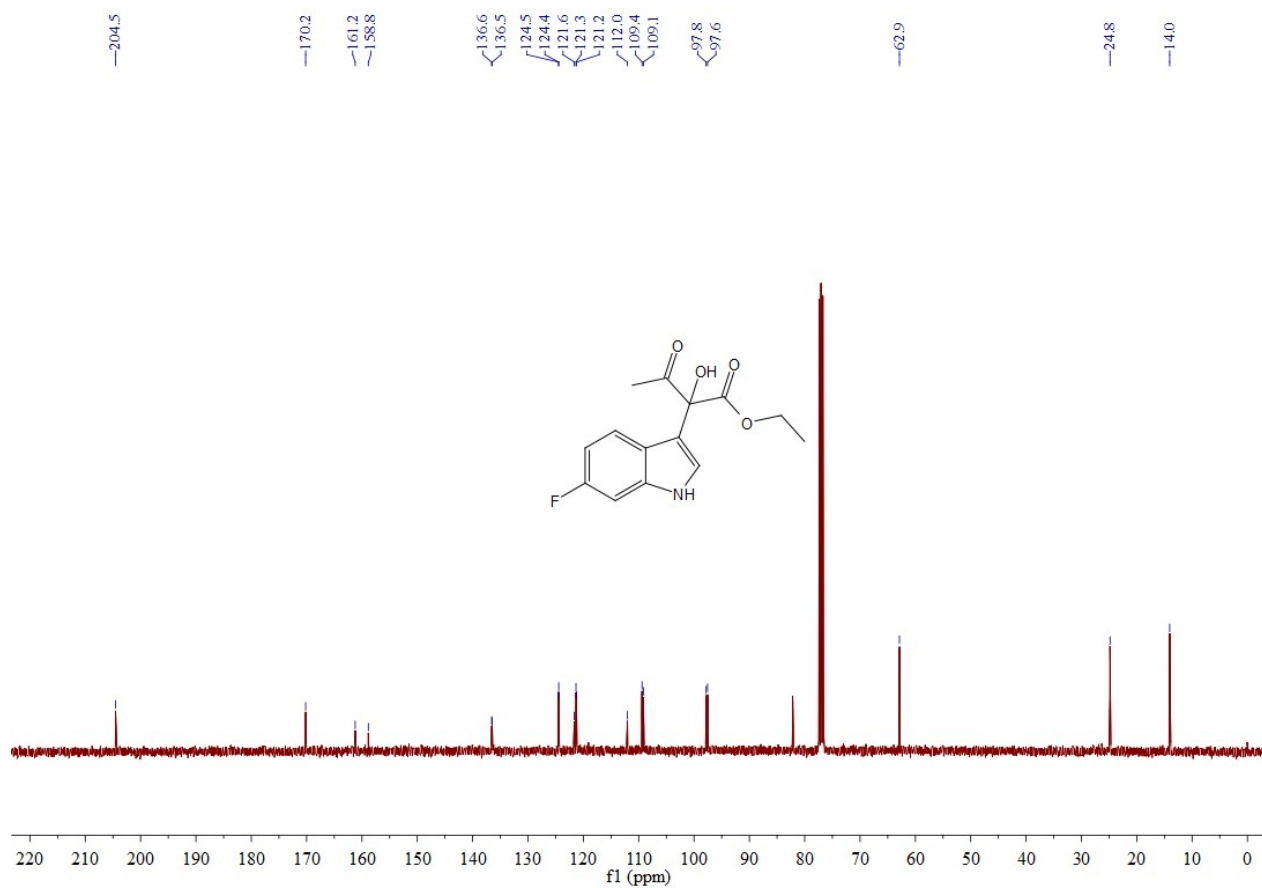

<sup>13</sup>C NMR of **3ia** in CDCl<sub>3</sub> at 299 K (δ in ppm).

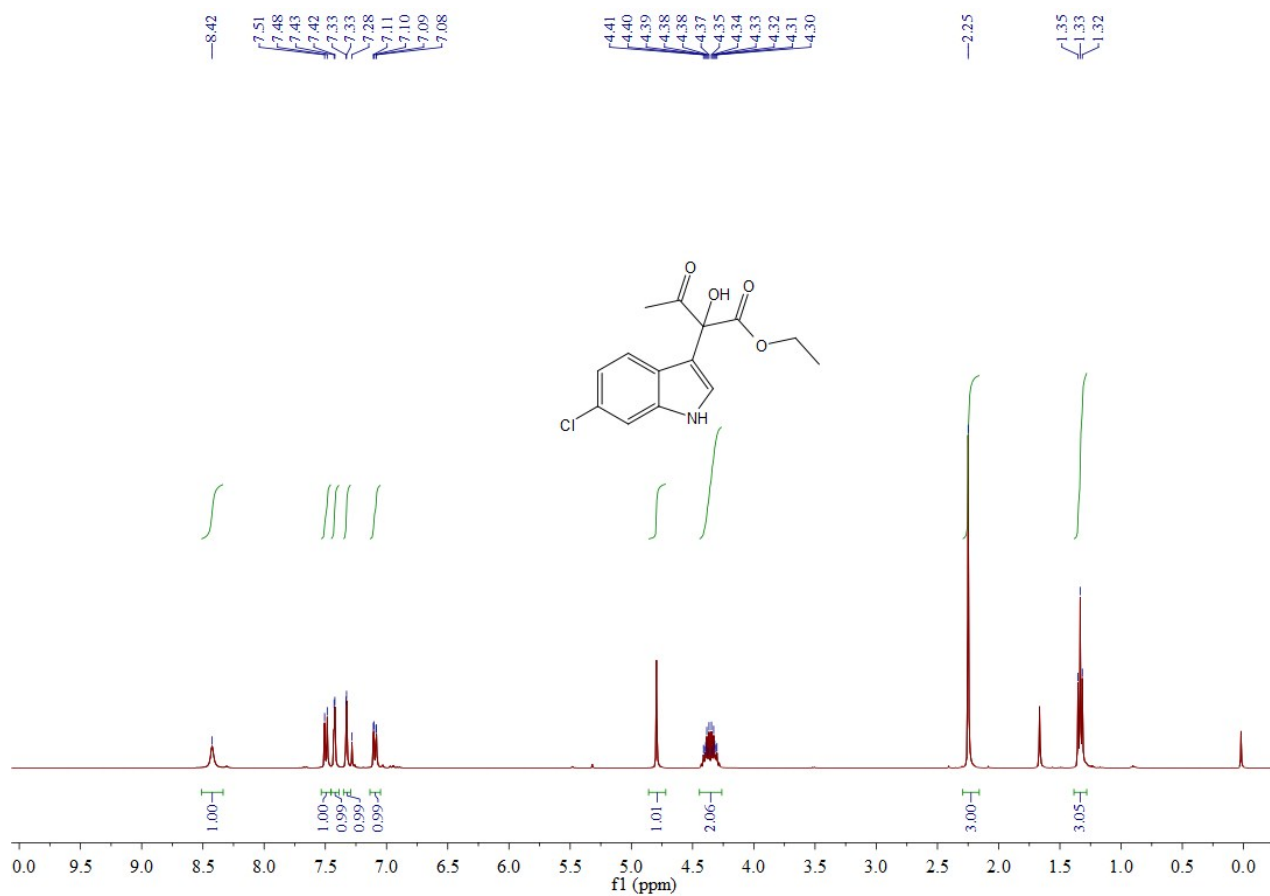

<sup>1</sup>H NMR of **3ja** in CDCl<sub>3</sub> at 297 K (δ in ppm).

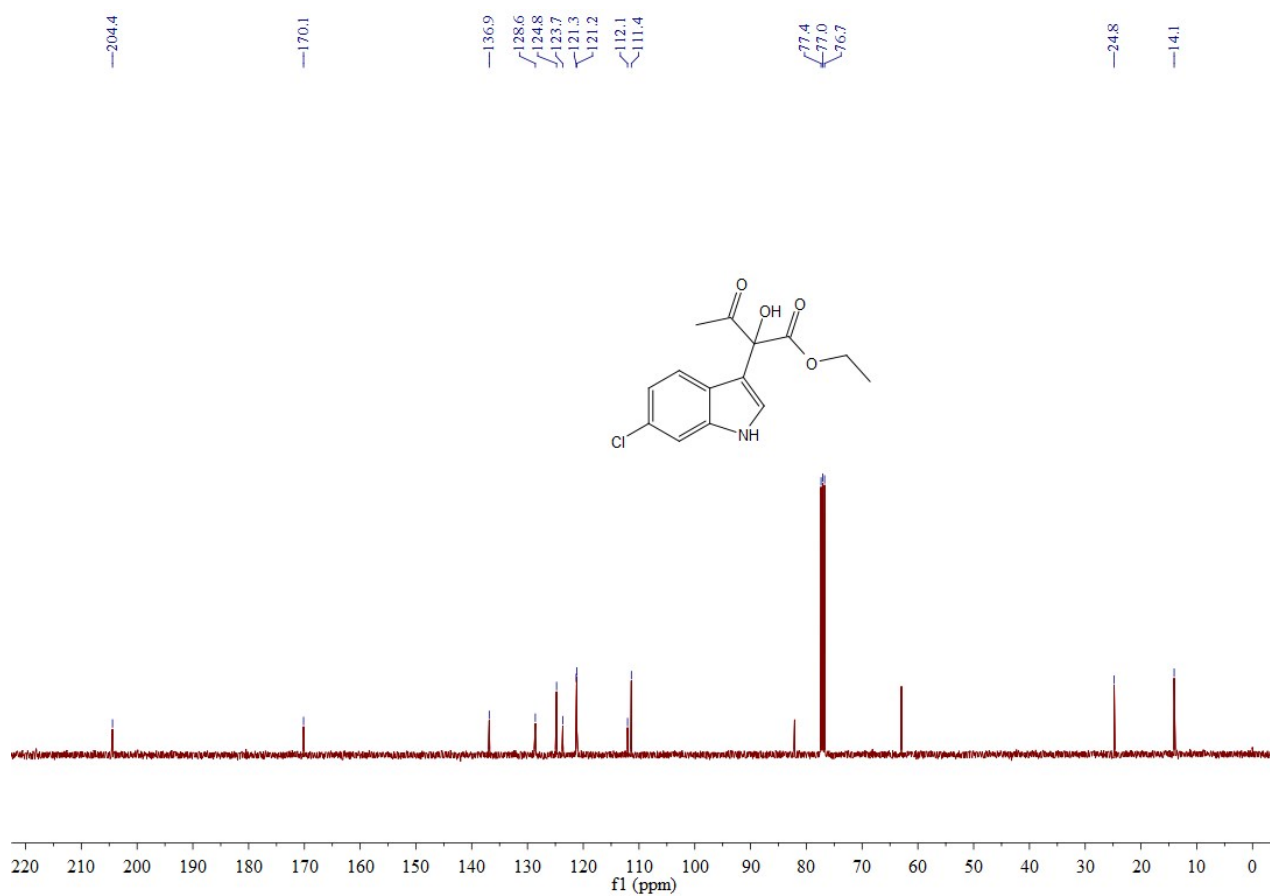

<sup>13</sup>C NMR of **3ja** in CDCl<sub>3</sub> at 299 K (δ in ppm).

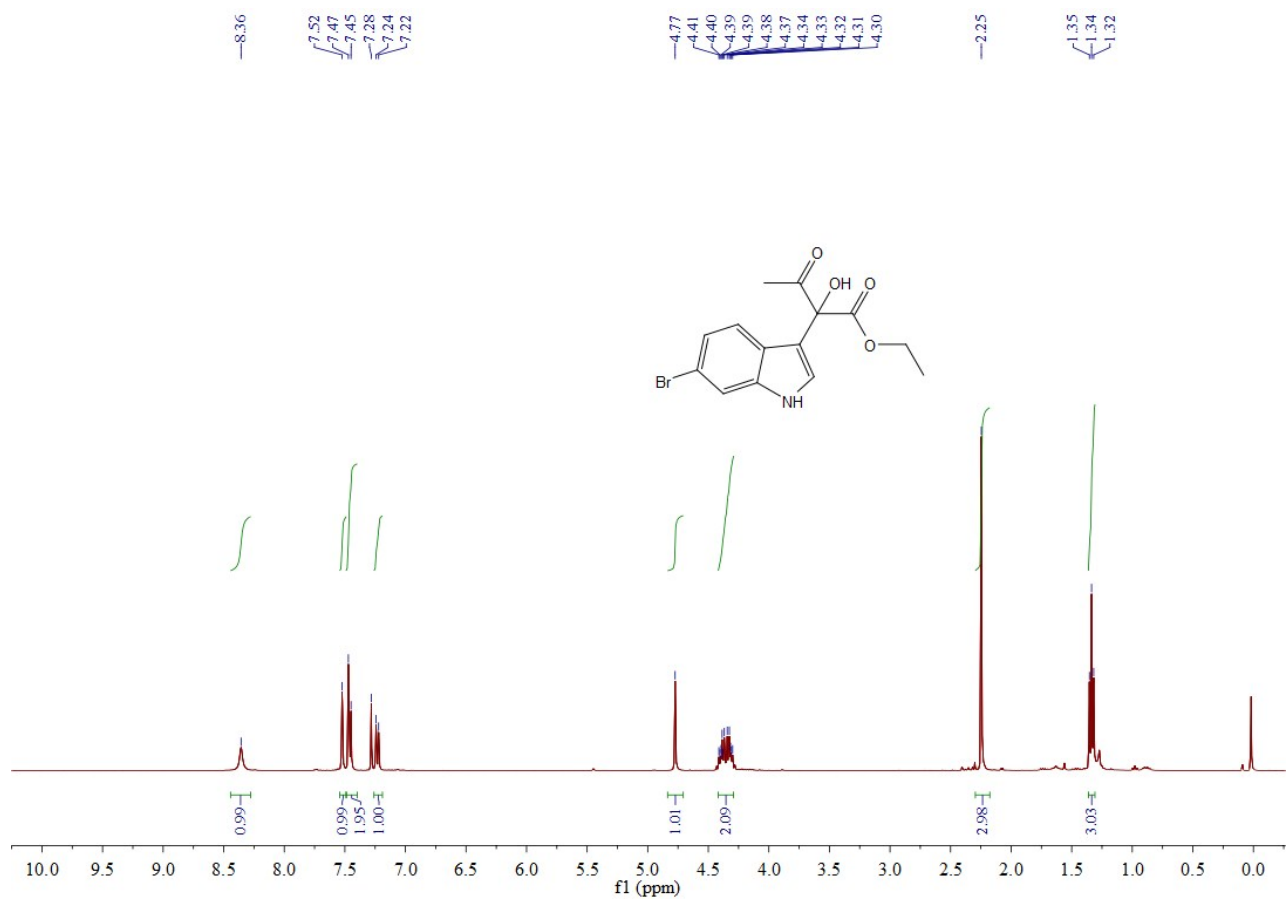

<sup>1</sup>H NMR of **3ka** in CDCl<sub>3</sub> at 297 K (δ in ppm).

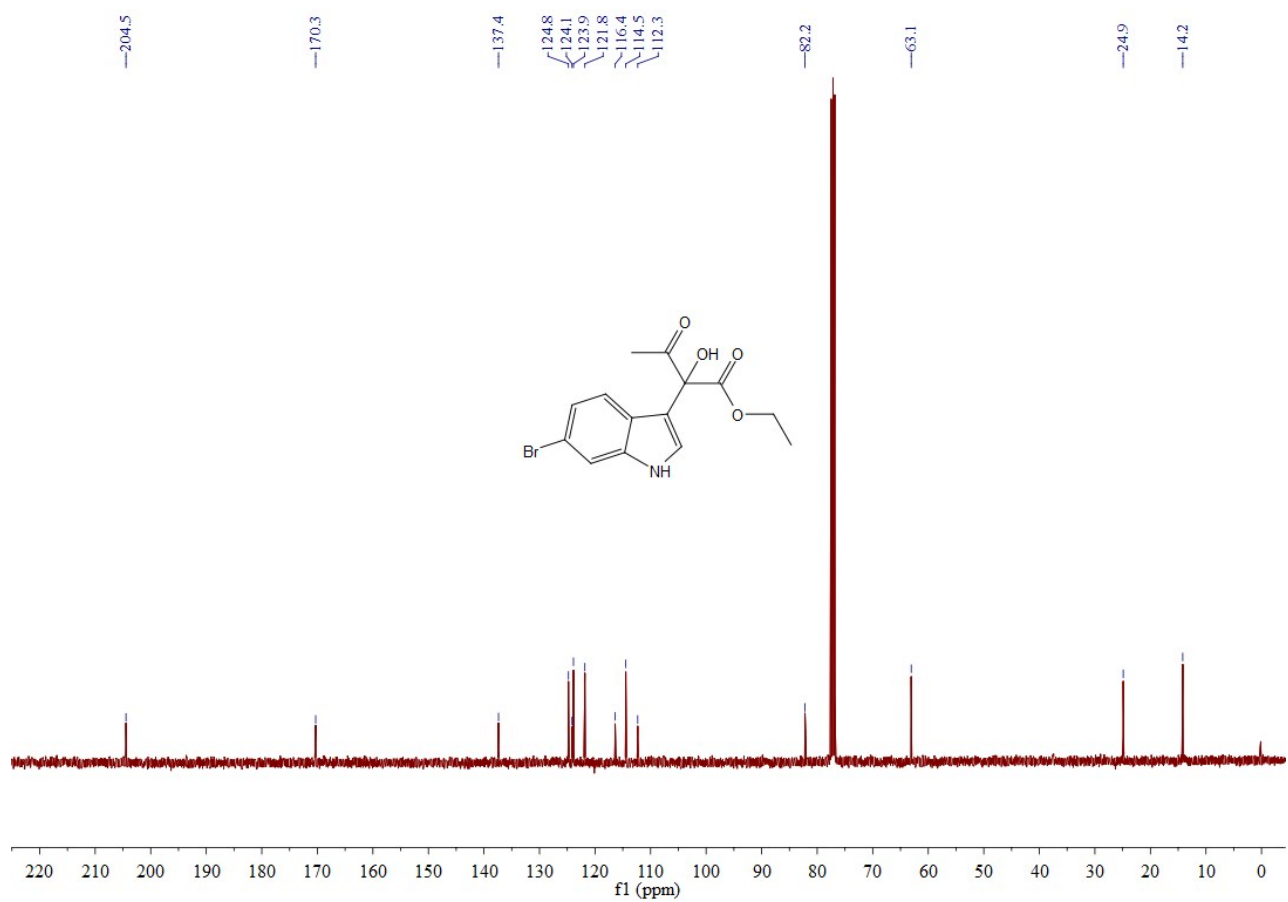

<sup>13</sup>C NMR of **3ka** in CDCl<sub>3</sub> at 299 K (δ in ppm).

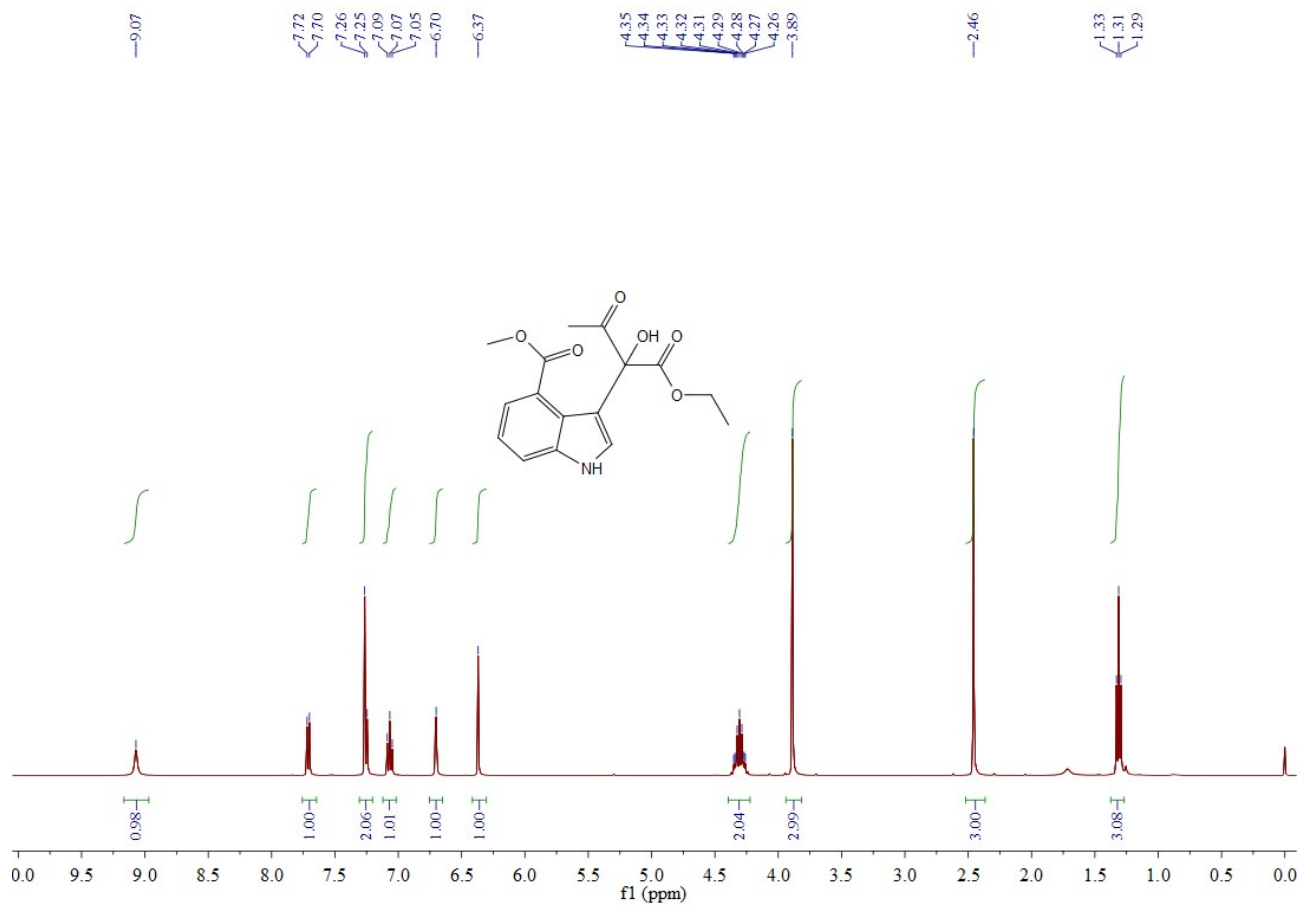

<sup>1</sup>H NMR of **3la** in CDCl<sub>3</sub> at 297 K (δ in ppm).

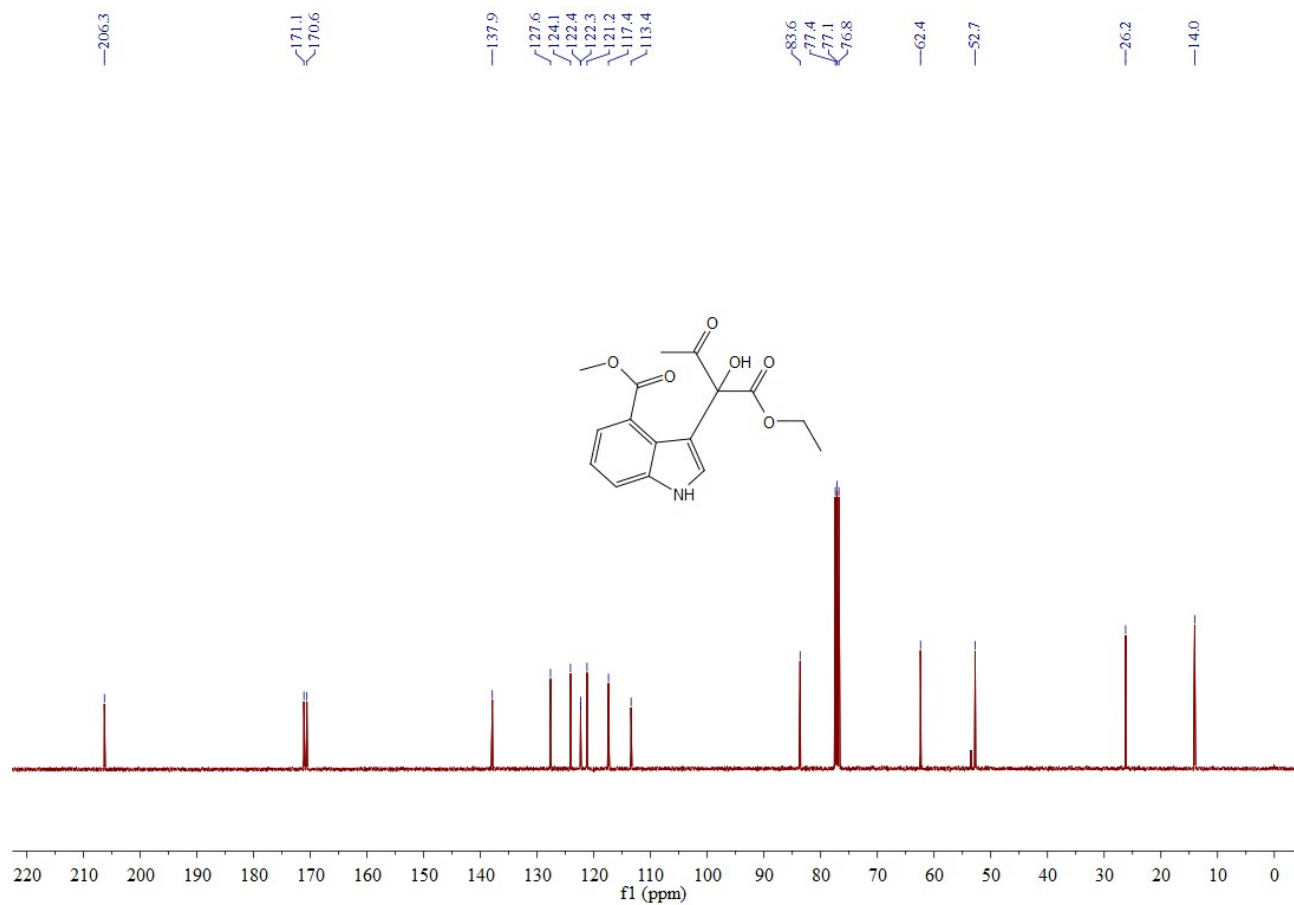

<sup>13</sup>C NMR of **3la** in CDCl<sub>3</sub> at 299 K (δ in ppm).

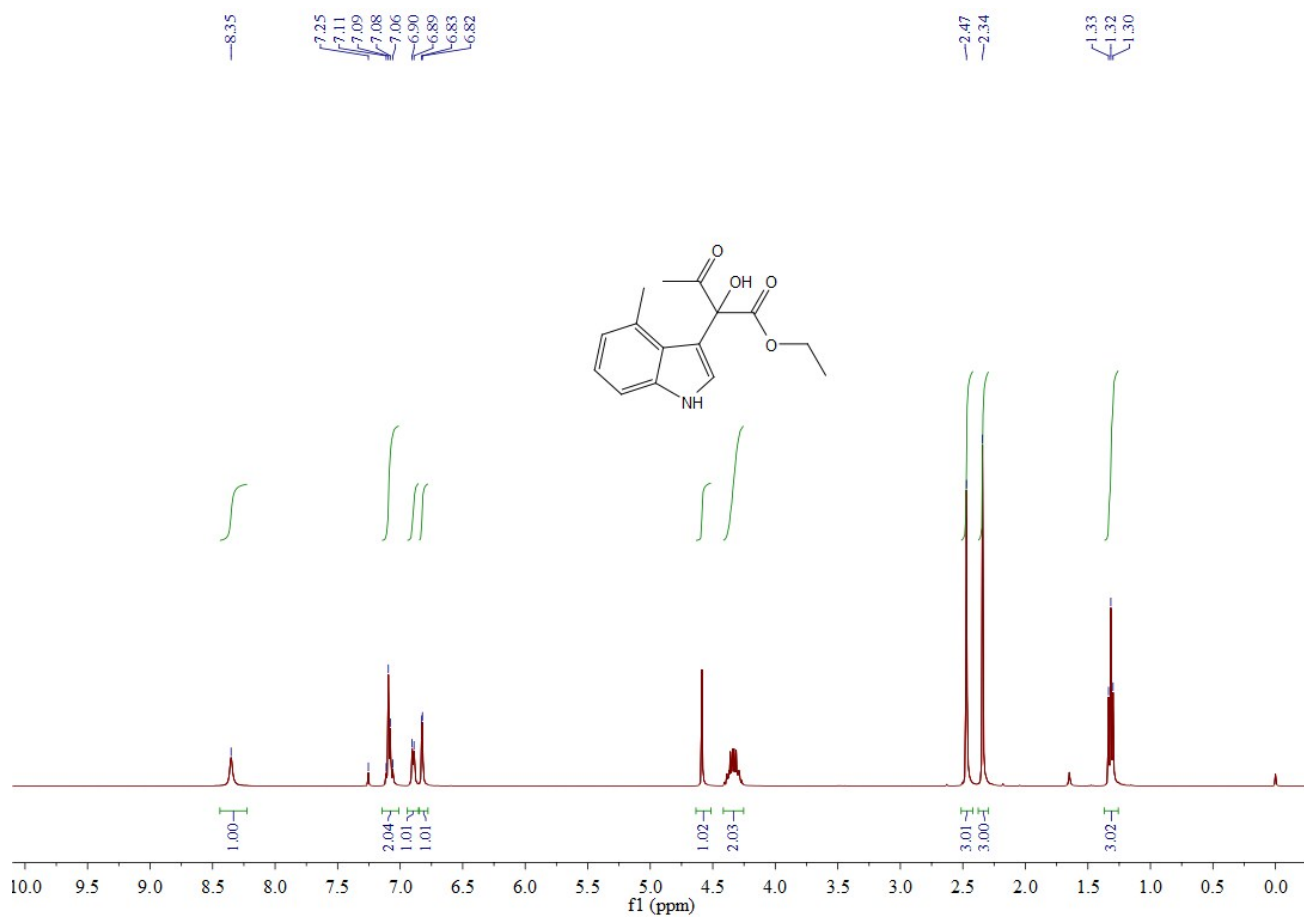

**<sup>1</sup>H NMR of **3ma** in CDCl<sub>3</sub> at 297 K (δ in ppm).**

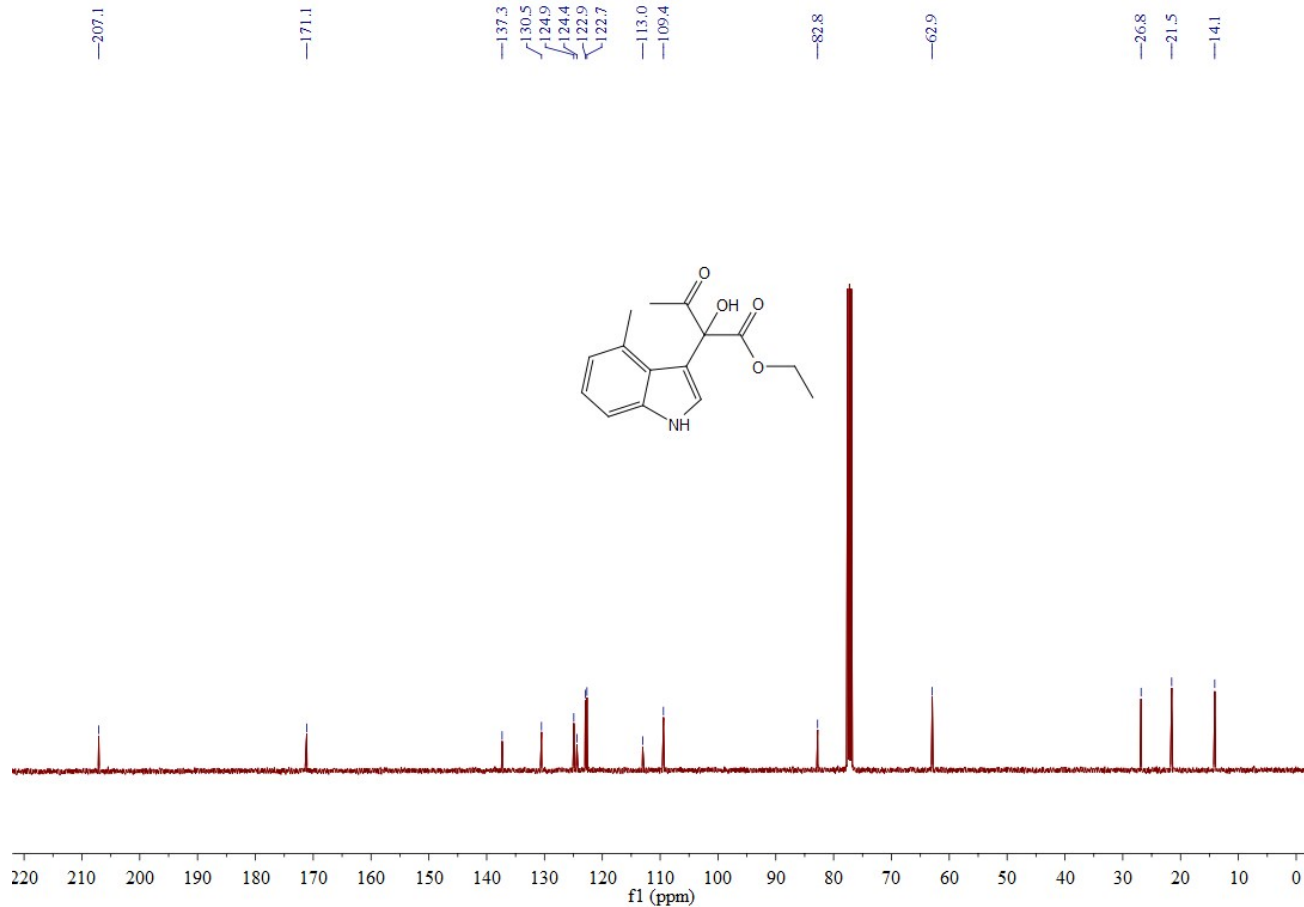

**<sup>13</sup>C NMR of **3ma** in CDCl<sub>3</sub> at 299 K (δ in ppm).**

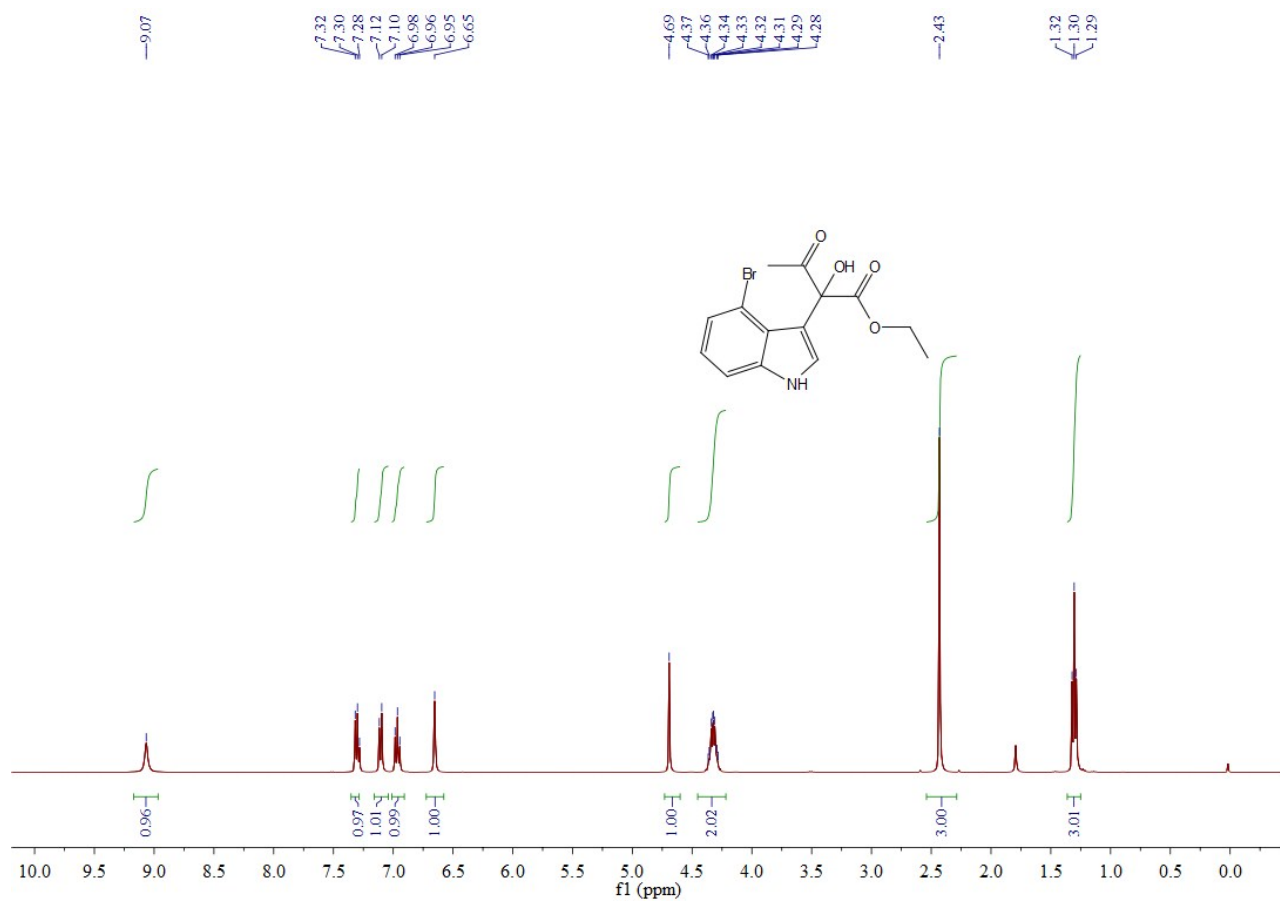

<sup>1</sup>H NMR of **3na** in CDCl<sub>3</sub> at 297 K (δ in ppm).

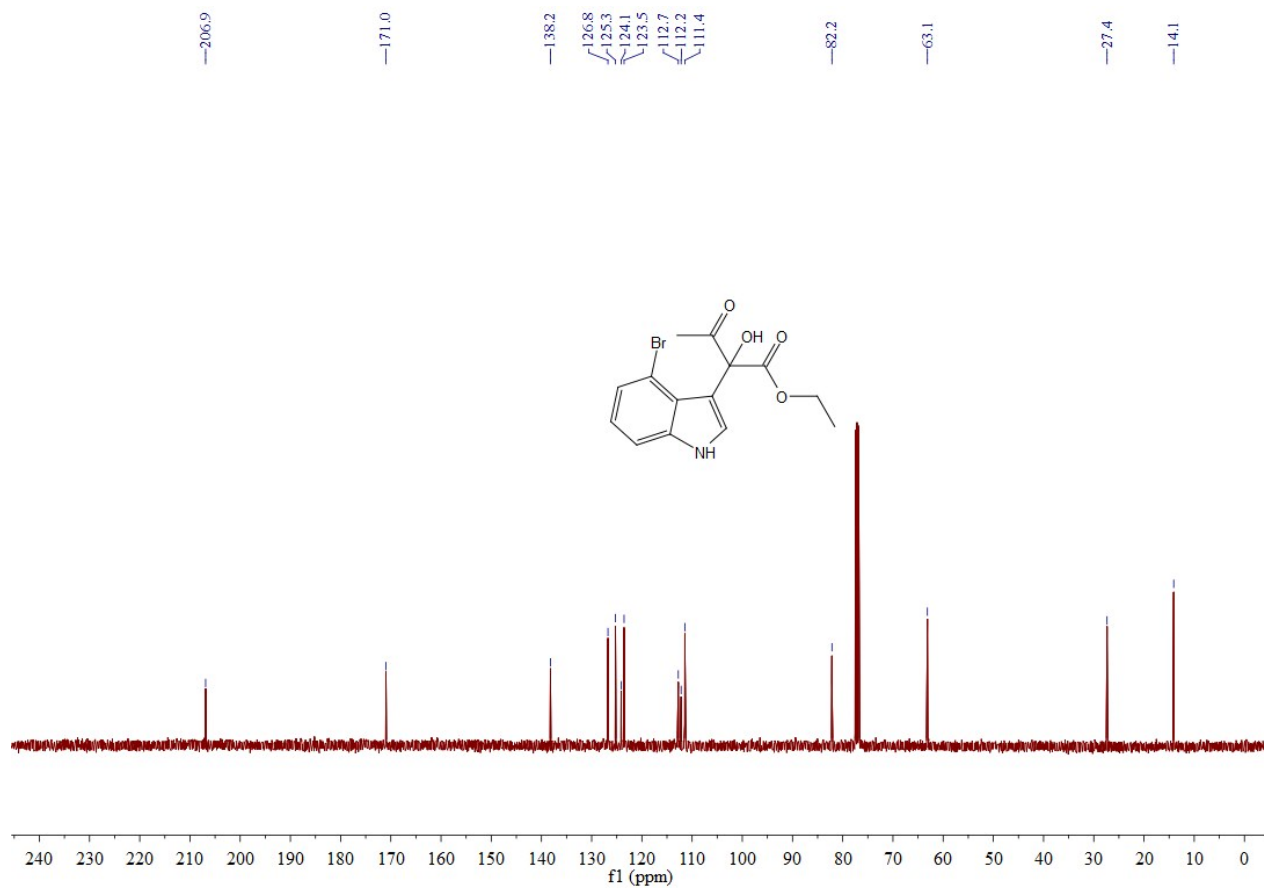

<sup>13</sup>C NMR of **3na** in CDCl<sub>3</sub> at 299 K (δ in ppm).



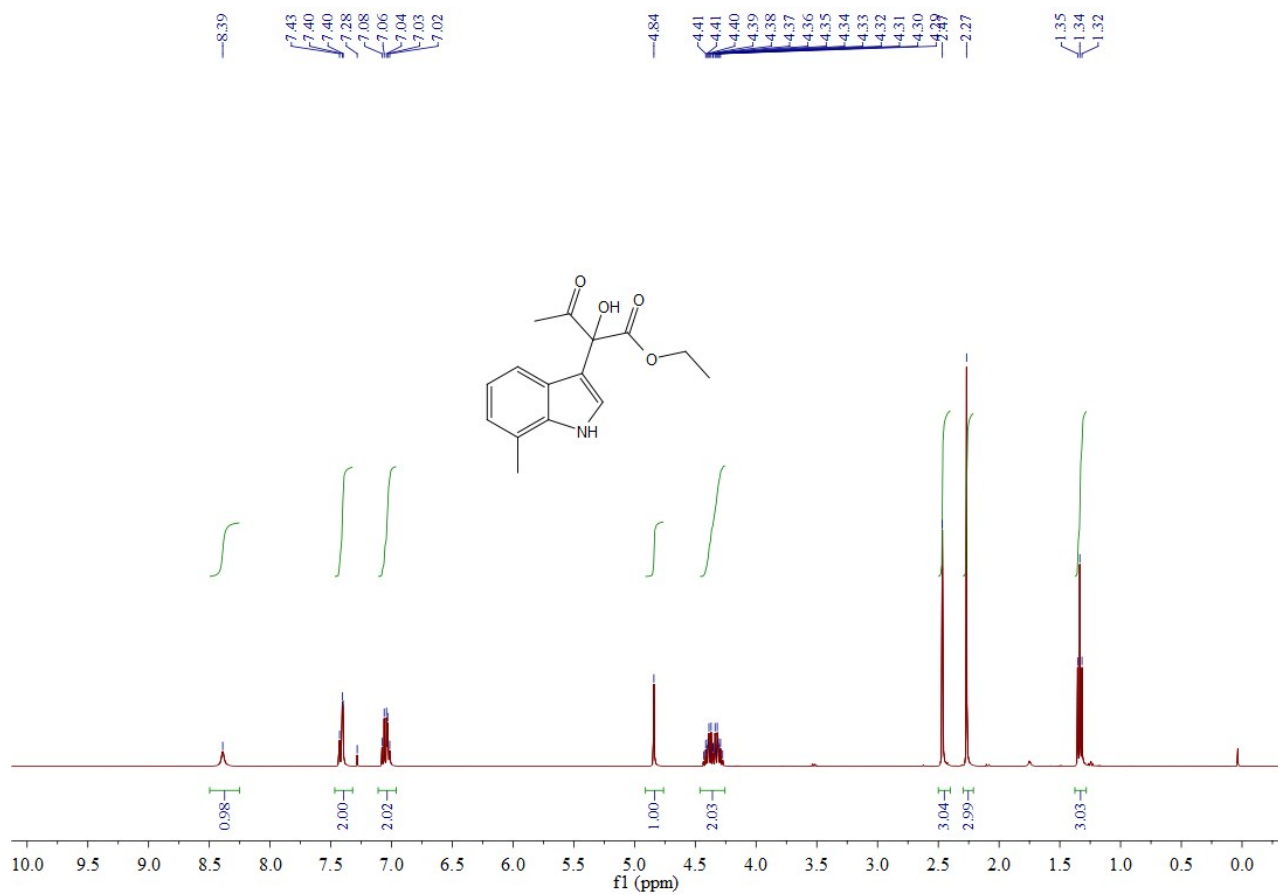

<sup>1</sup>H NMR of **30a** in CDCl<sub>3</sub> at 297 K (δ in ppm).

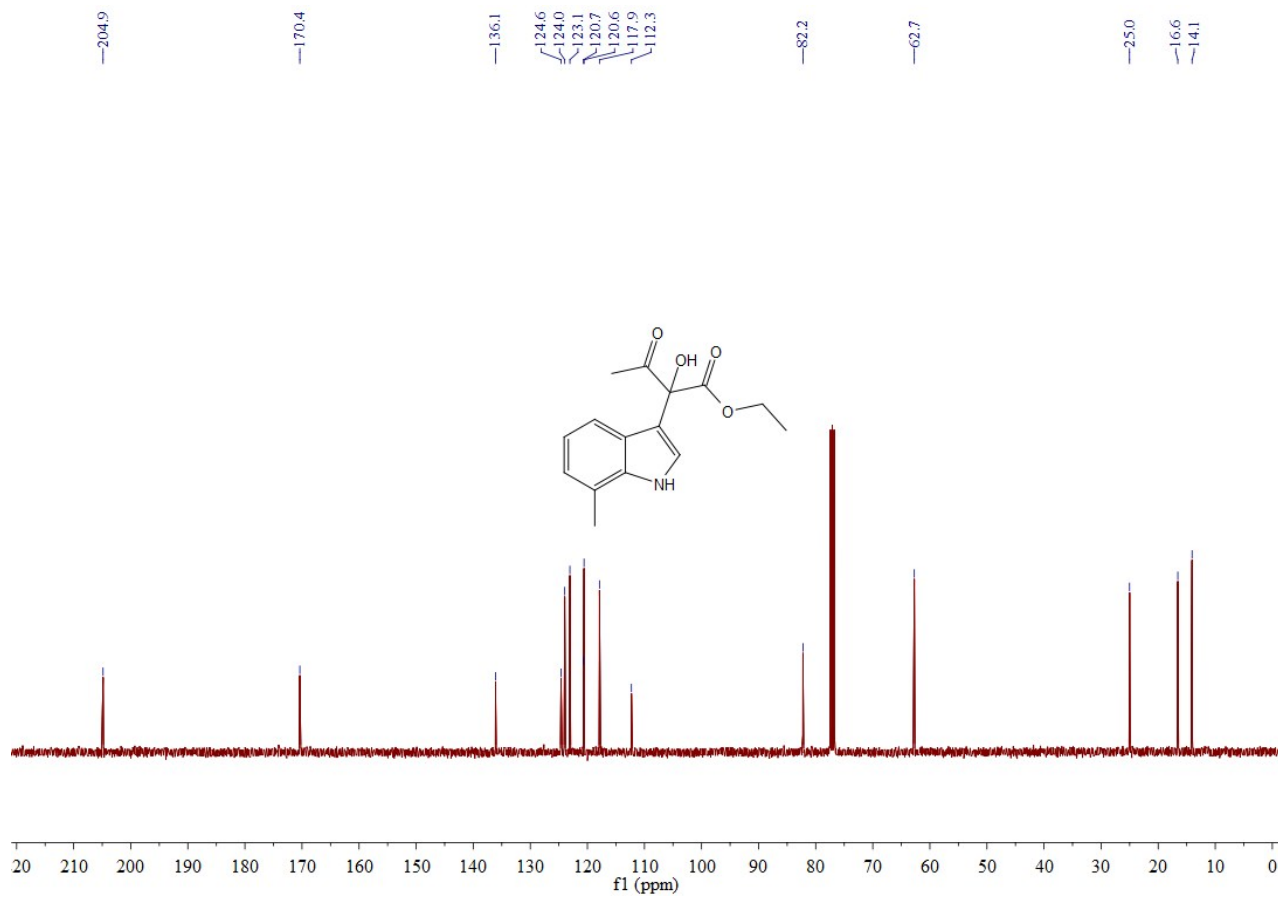

<sup>13</sup>C NMR of **30a** in CDCl<sub>3</sub> at 299 K (δ in ppm).

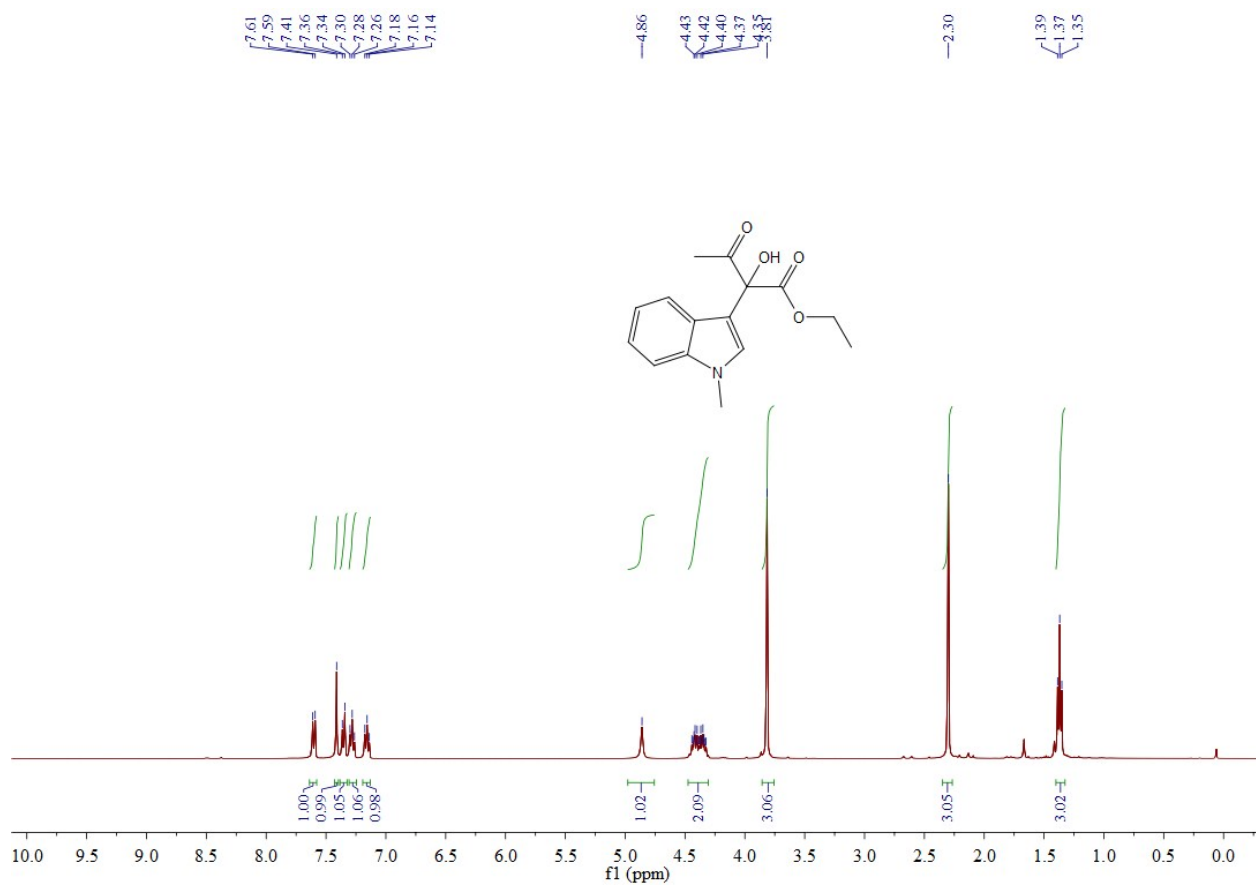

**<sup>1</sup>H NMR of 3pa in CDCl<sub>3</sub> at 299 K (δ in ppm).**

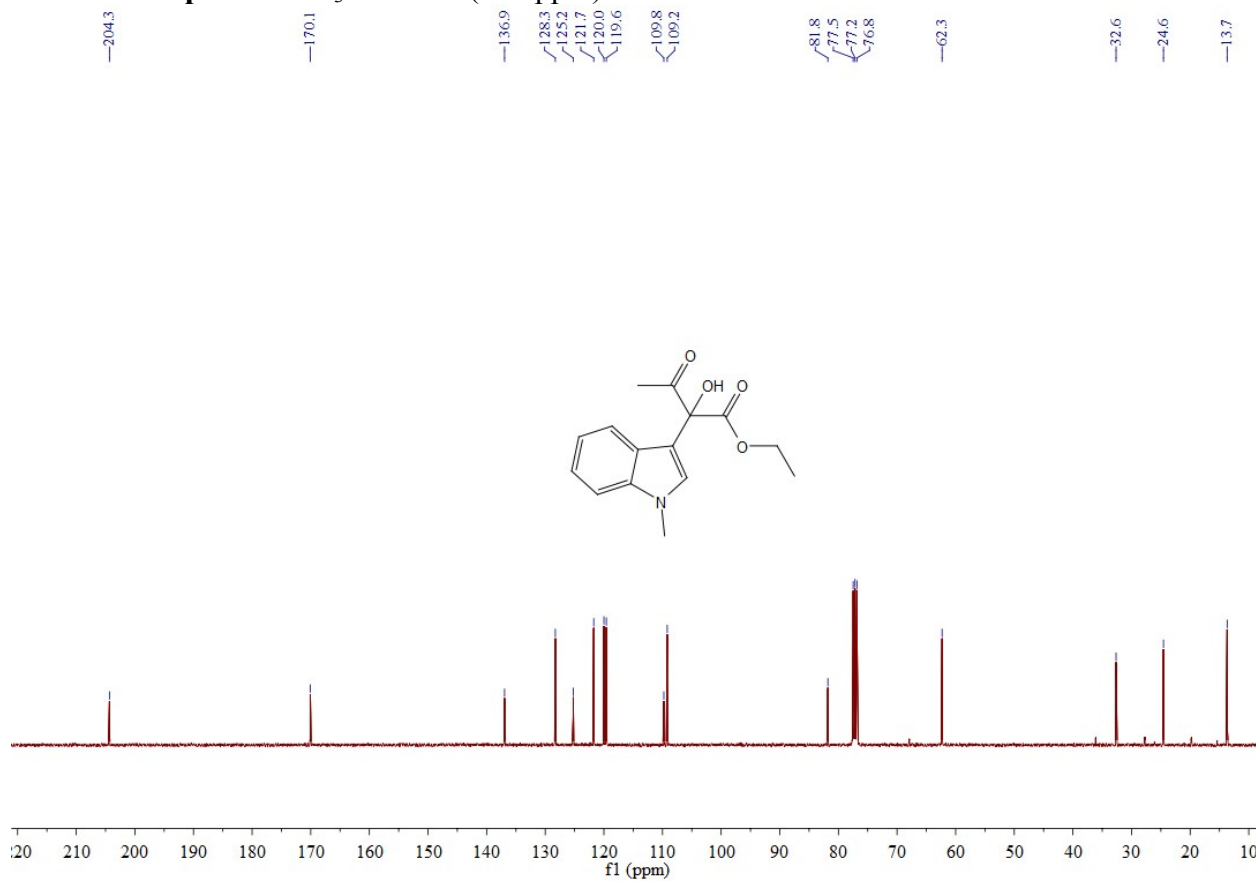

**<sup>13</sup>C NMR of 3pa in CDCl<sub>3</sub> at 299 K (δ in ppm).**

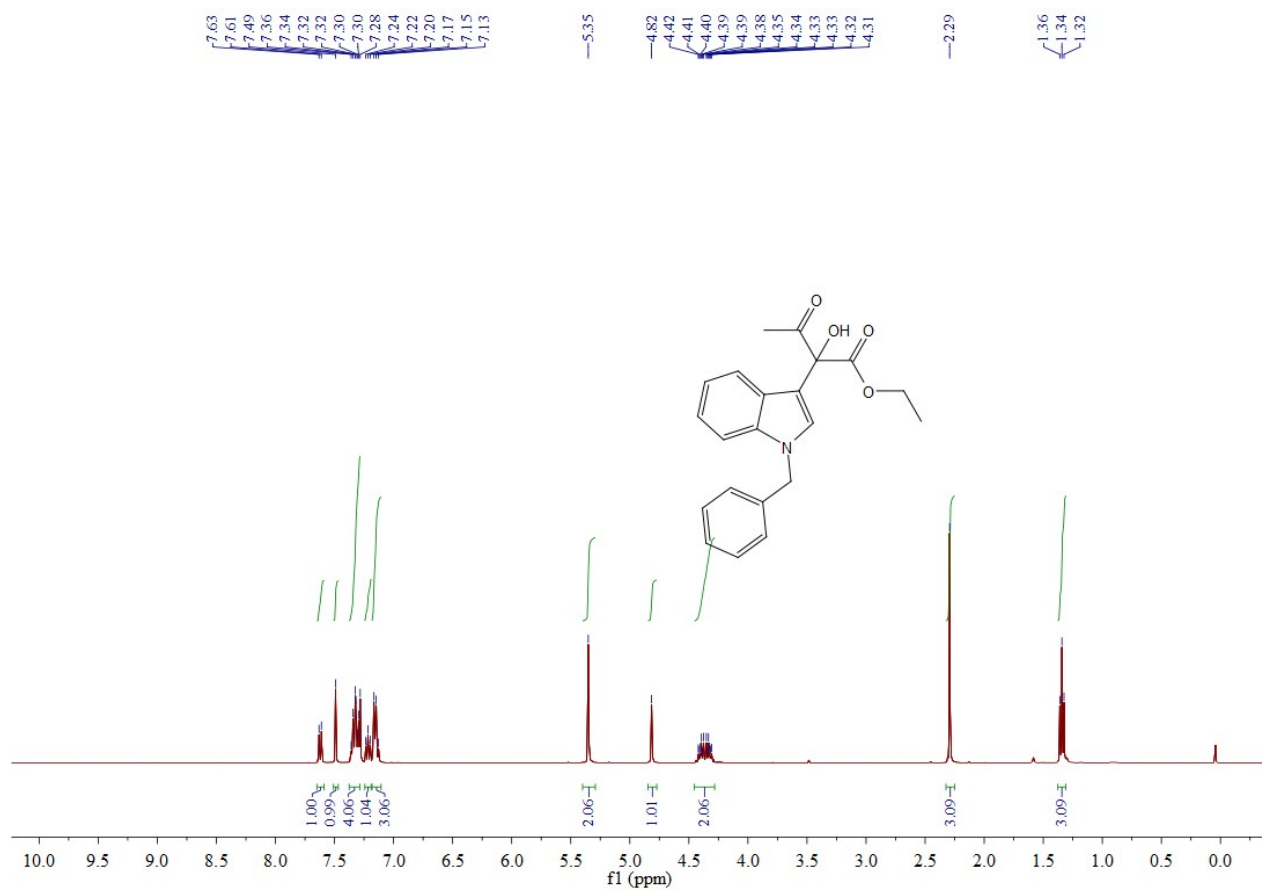

<sup>1</sup>H NMR of **3qa** in CDCl<sub>3</sub> at 297 K (δ in ppm).

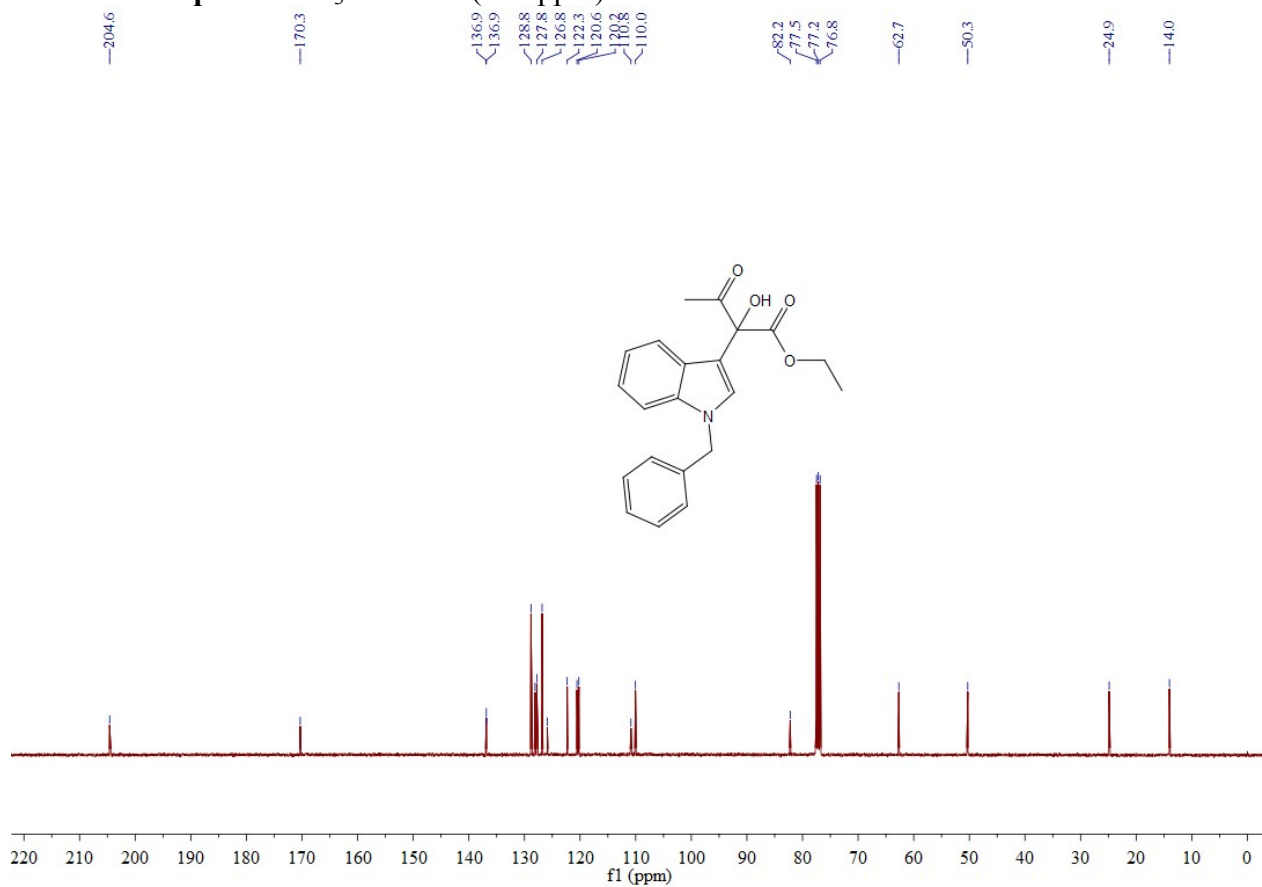

<sup>13</sup>C NMR of **3qa** in CDCl<sub>3</sub> at 299 K (δ in ppm).

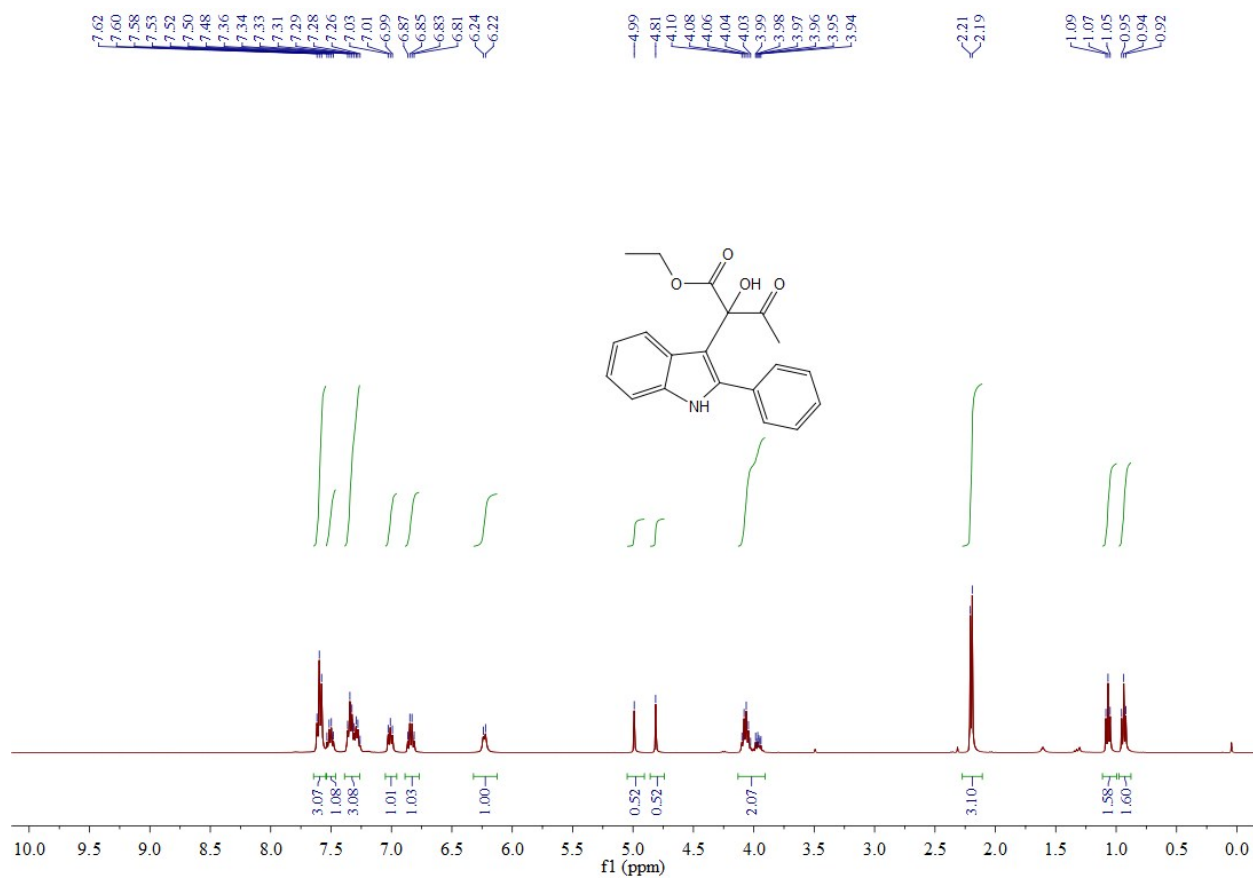

<sup>1</sup>H NMR of **3ra** in CDCl<sub>3</sub> at 297 K (δ in ppm).

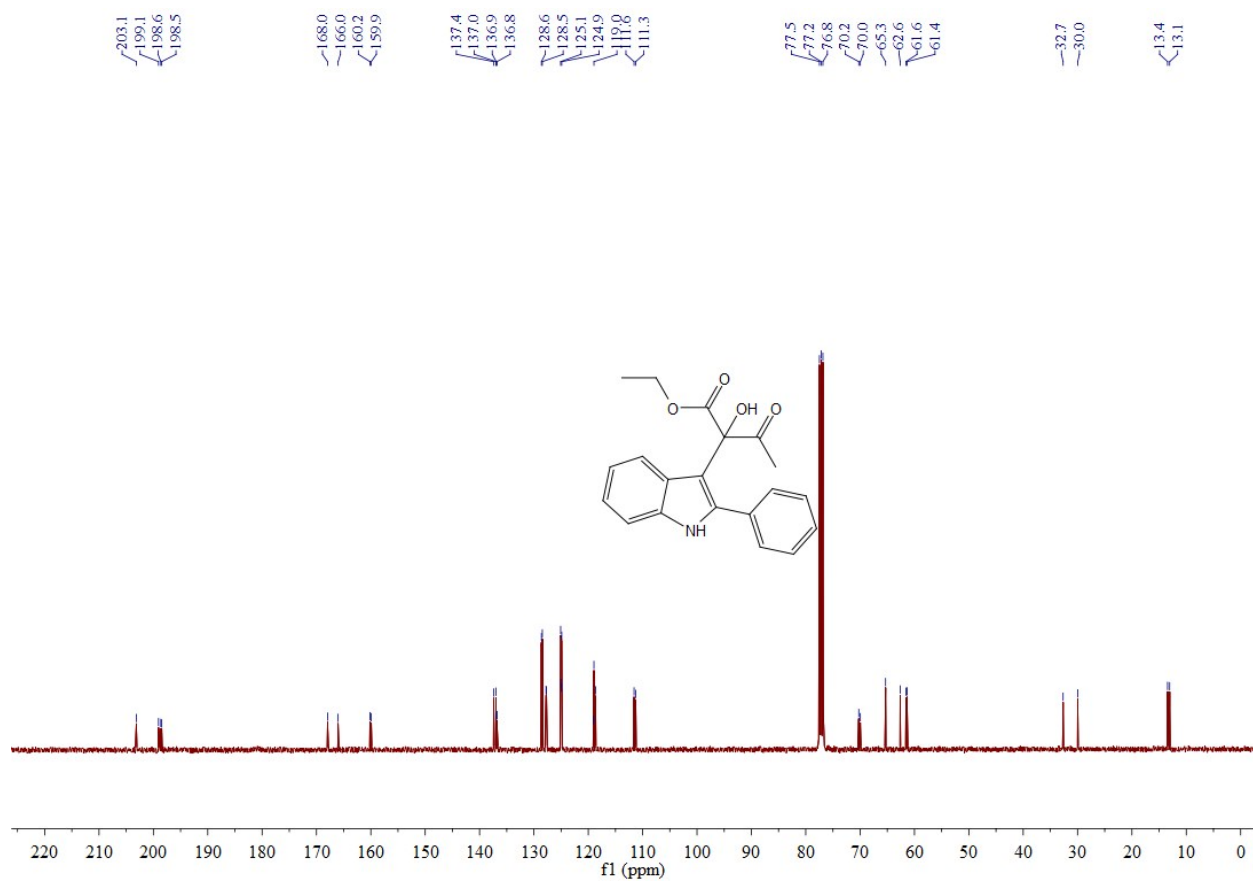

<sup>13</sup>C NMR of **3ra** in CDCl<sub>3</sub> at 299 K (δ in ppm).

## 6. $^1\text{H}$ and $^{13}\text{C}$ NMR Spectra of Compounds 4ab-4ai

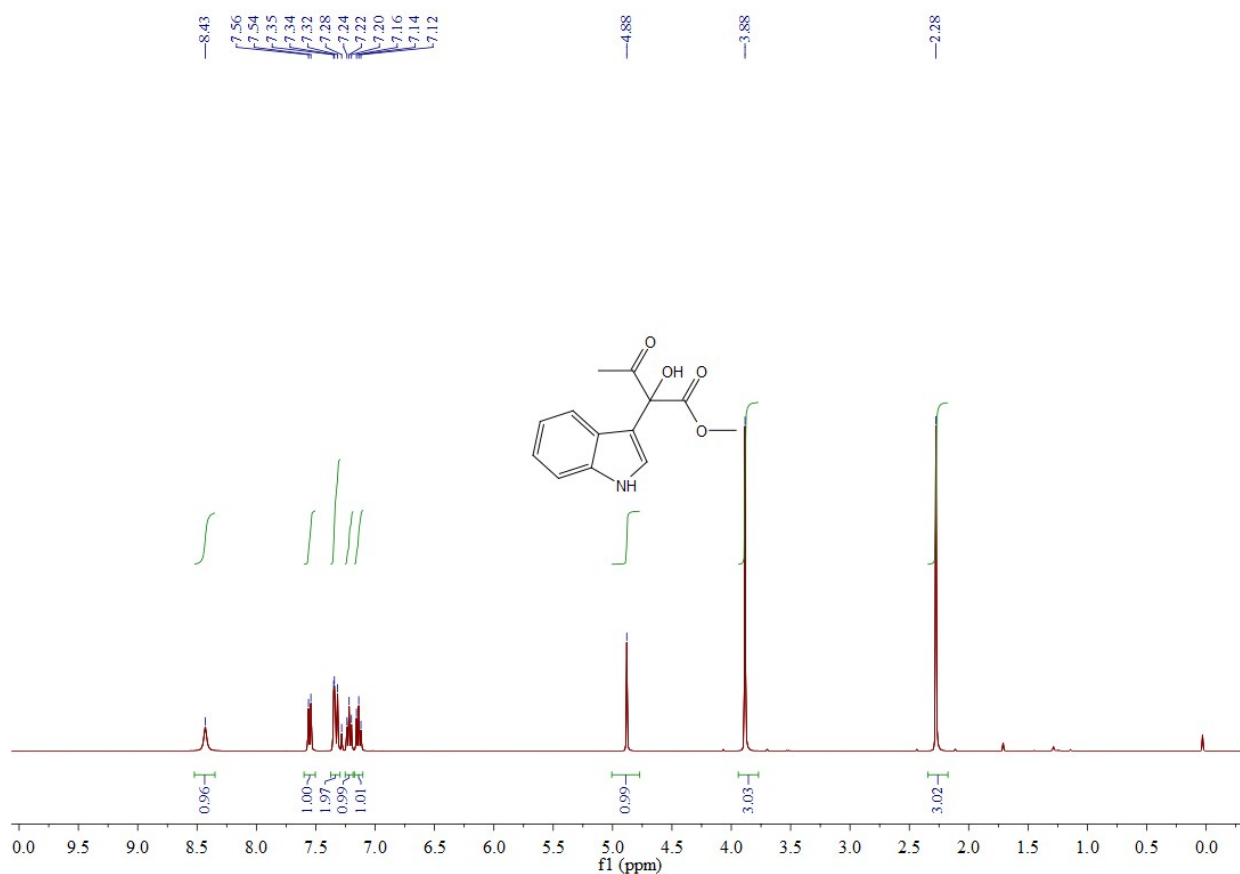

$^1\text{H}$  NMR of **4ab** in  $\text{CDCl}_3$  at 297 K ( $\delta$  in ppm).

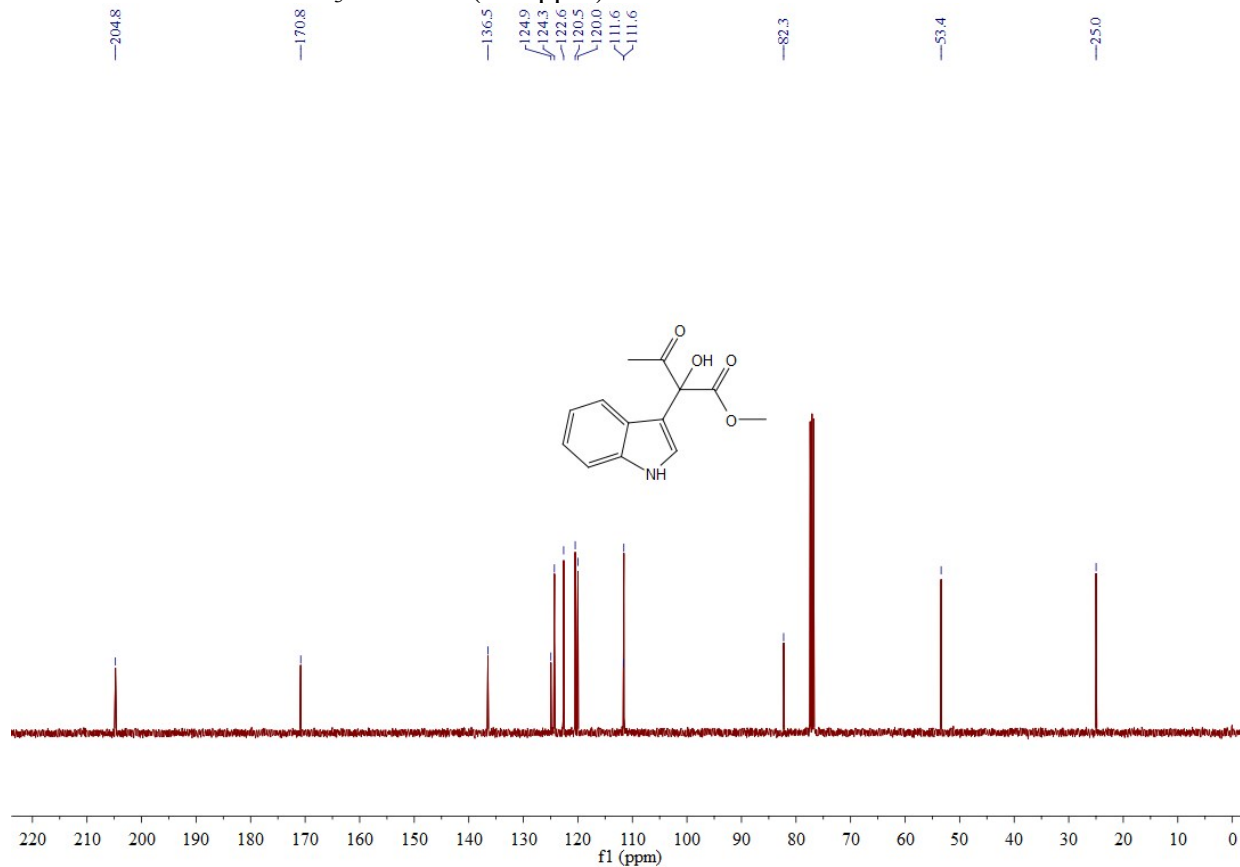

$^{13}\text{C}$  NMR of **4ab** in  $\text{CDCl}_3$  at 299 K ( $\delta$  in ppm).

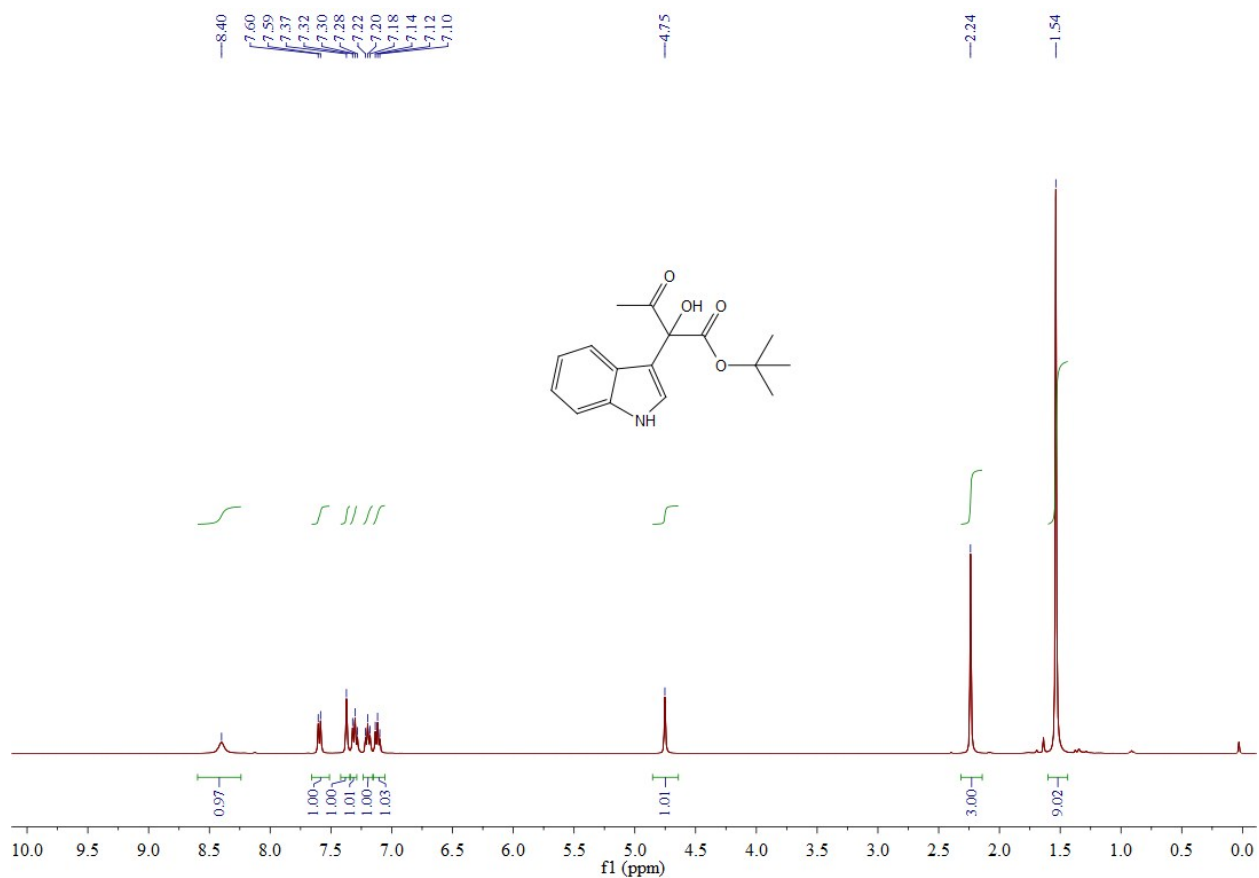

<sup>1</sup>H NMR of **4ac** in CDCl<sub>3</sub> at 297 K (δ in ppm).

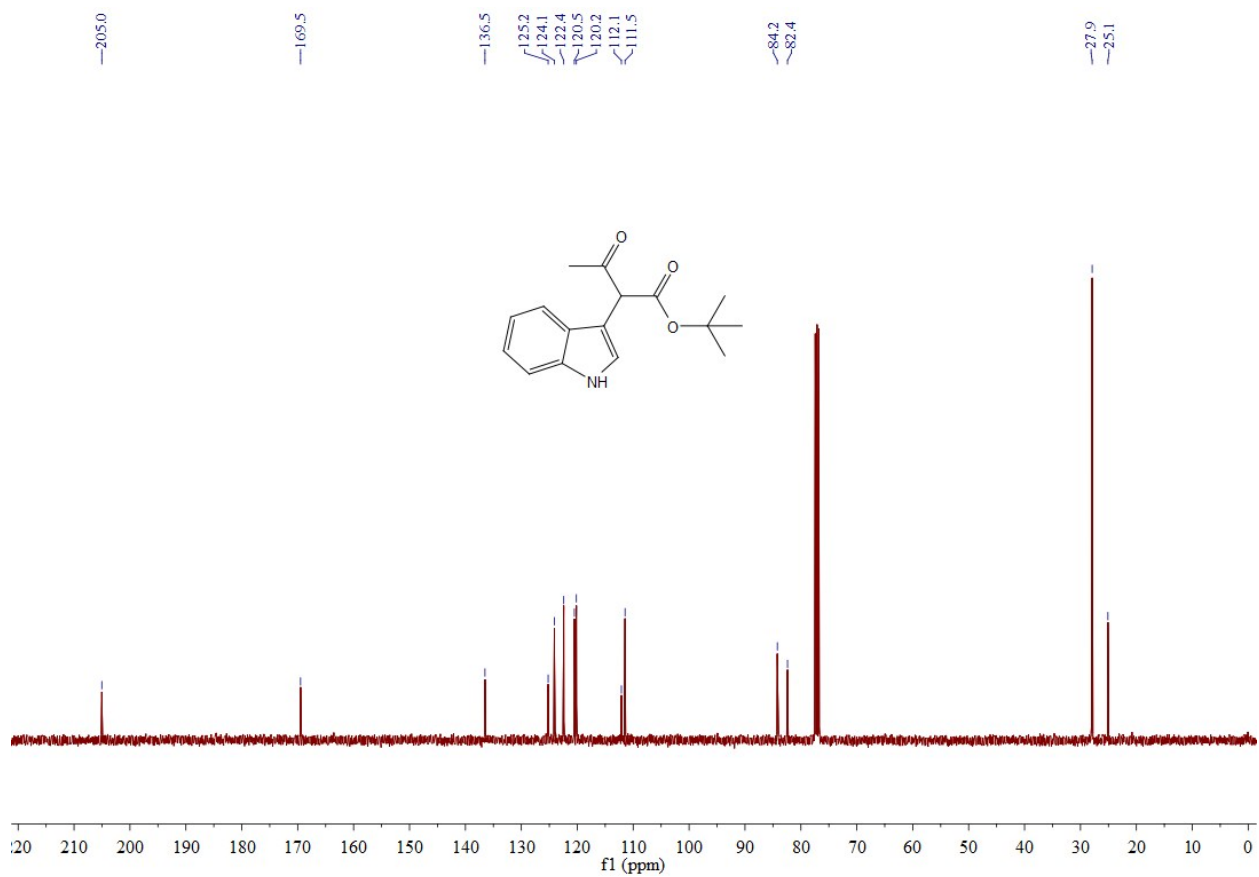

<sup>13</sup>C NMR of **4ac** in CDCl<sub>3</sub> at 299 K (δ in ppm).

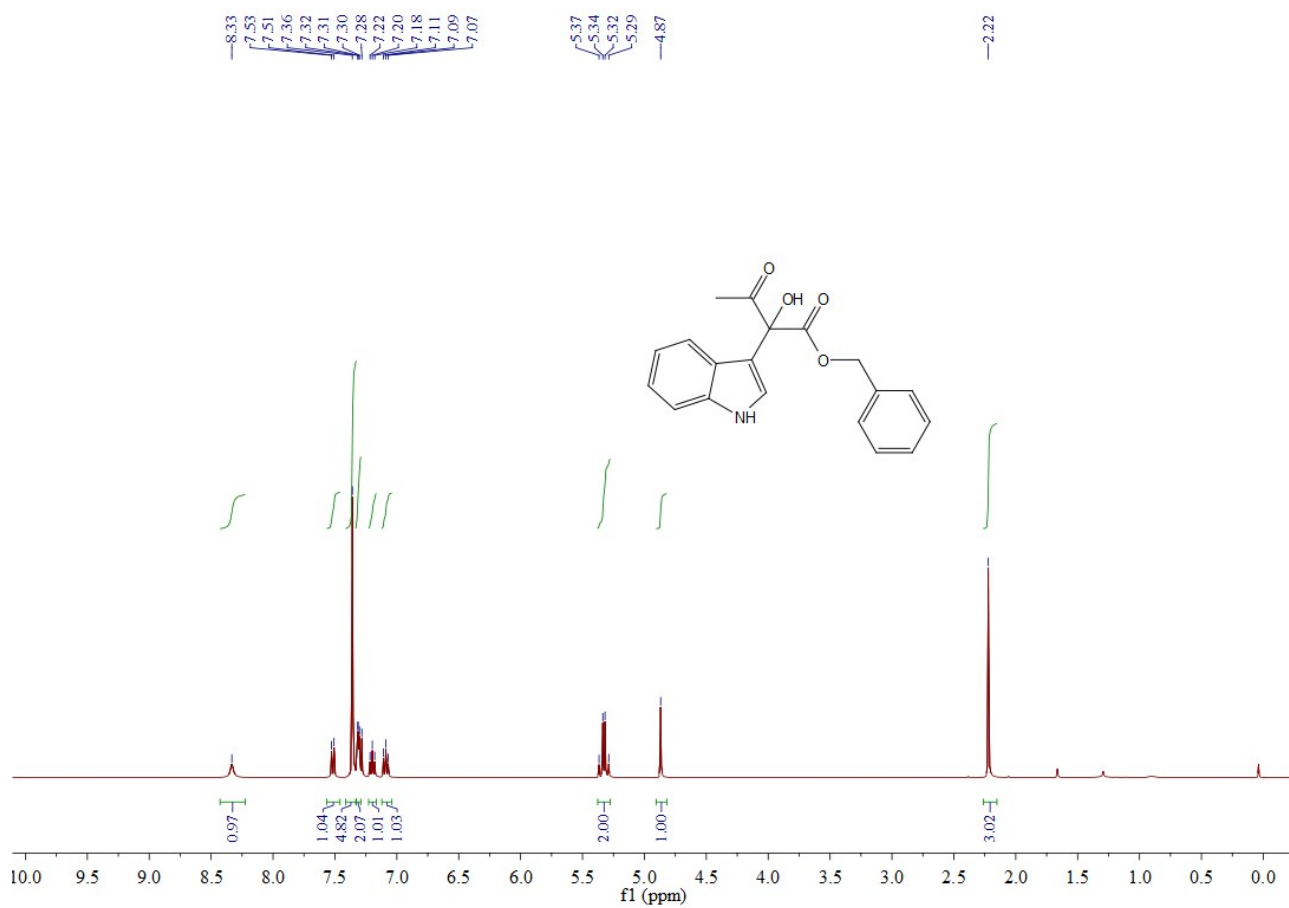

<sup>1</sup>H NMR of **4ad** in CDCl<sub>3</sub> at 297 K (δ in ppm).

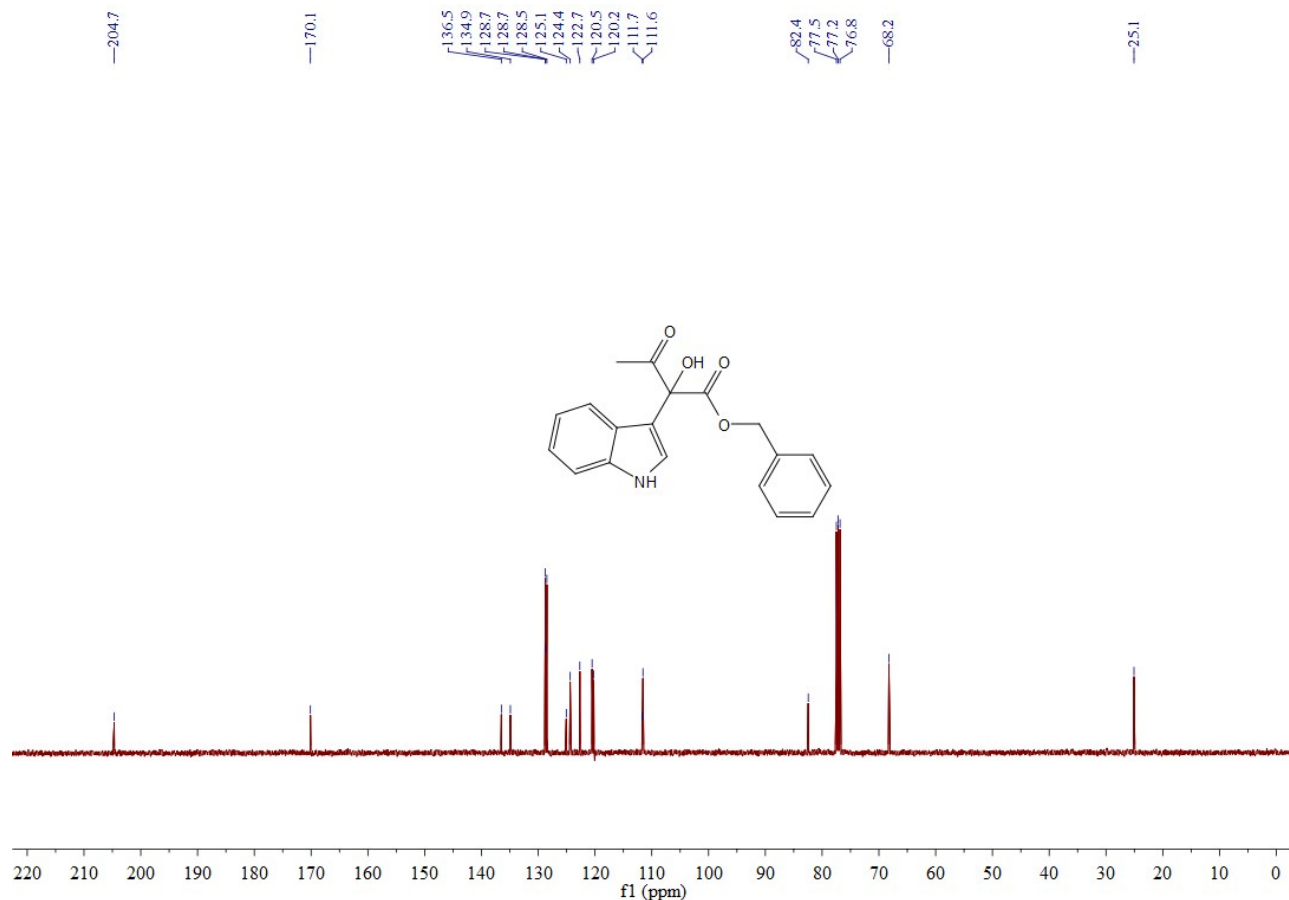

<sup>13</sup>C NMR of **4ad** in CDCl<sub>3</sub> at 299 K (δ in ppm).

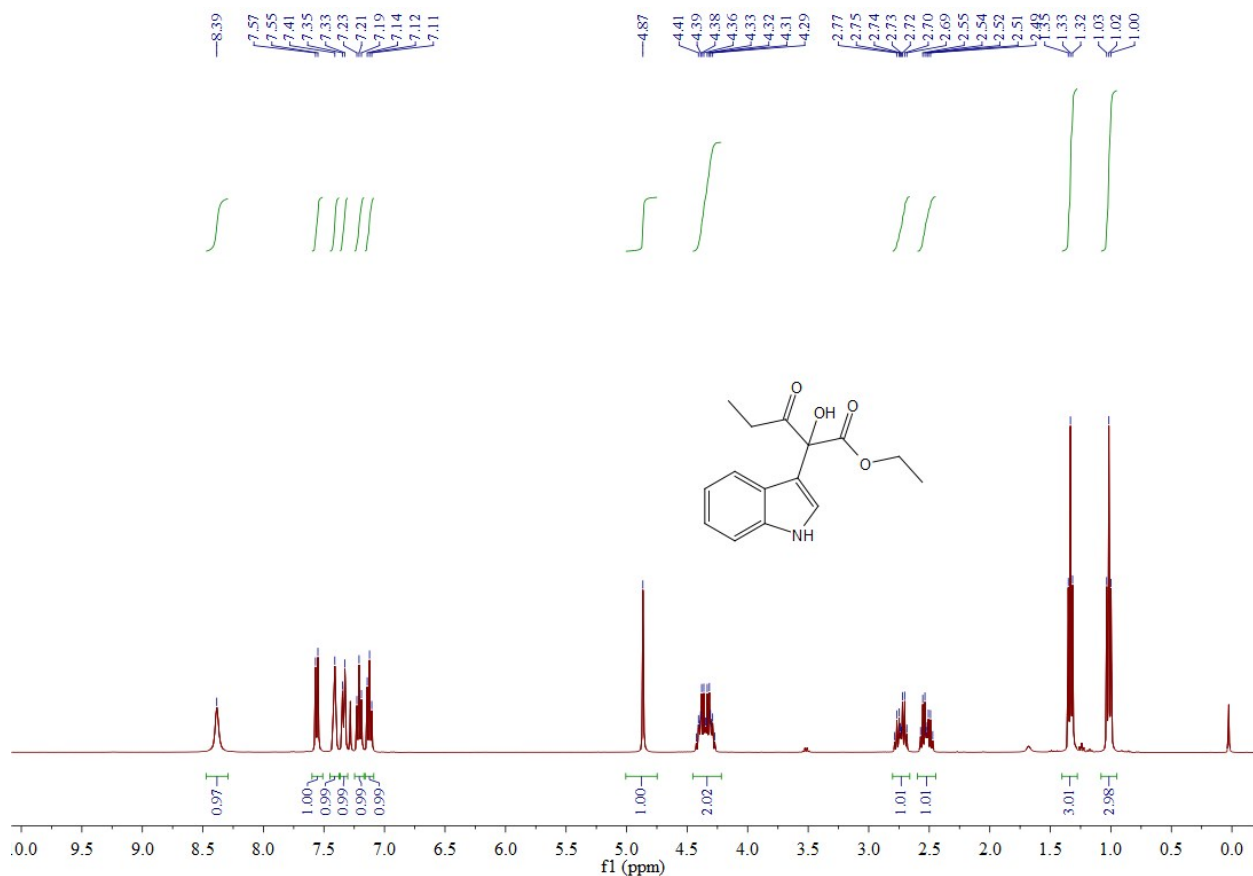

<sup>1</sup>H NMR of **4ae** in CDCl<sub>3</sub> at 299 K (δ in ppm).

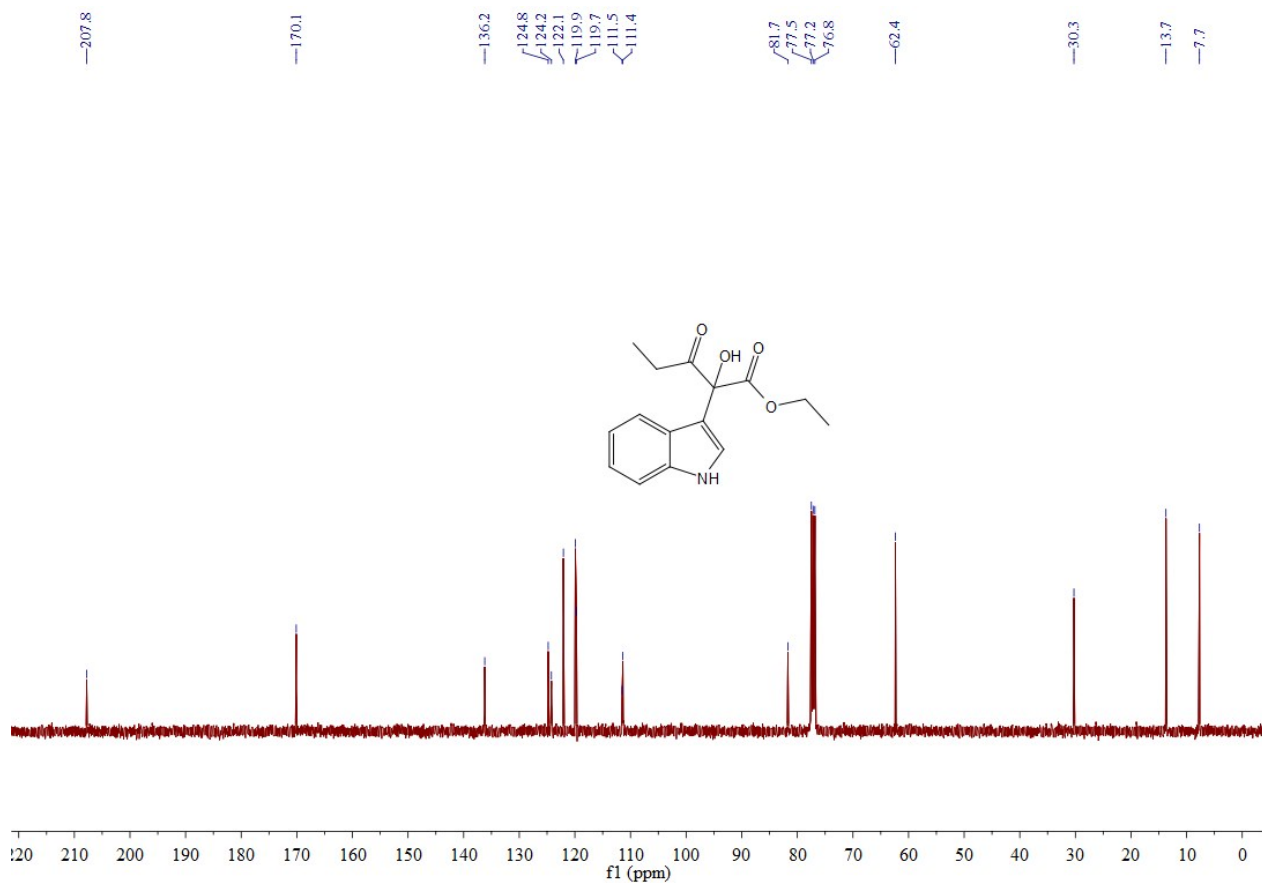

<sup>13</sup>C NMR of **4ae** in CDCl<sub>3</sub> at 299 K (δ in ppm).



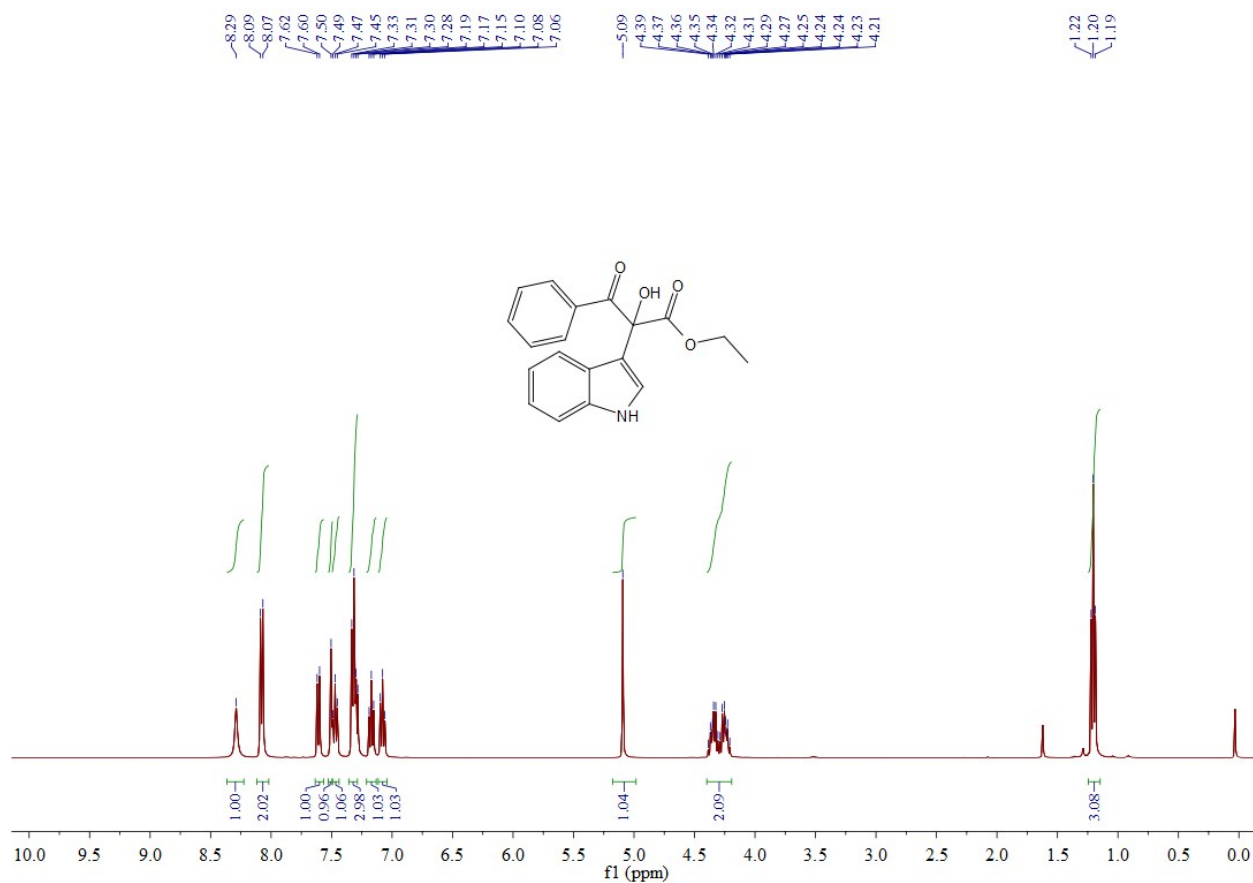

<sup>1</sup>H NMR of **4af** in CDCl<sub>3</sub> at 299 K (δ in ppm).

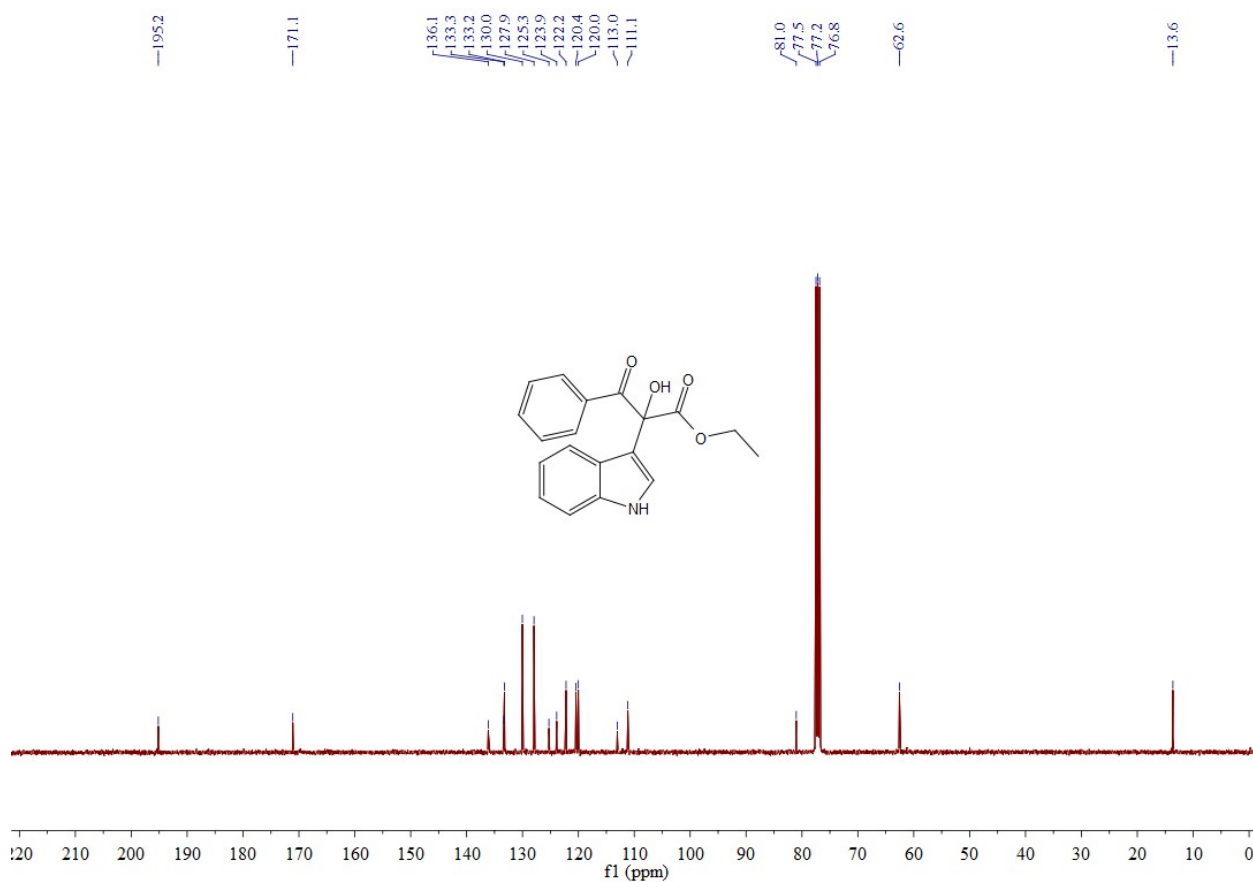

<sup>13</sup>C NMR of **4af** in CDCl<sub>3</sub> at 299 K (δ in ppm).

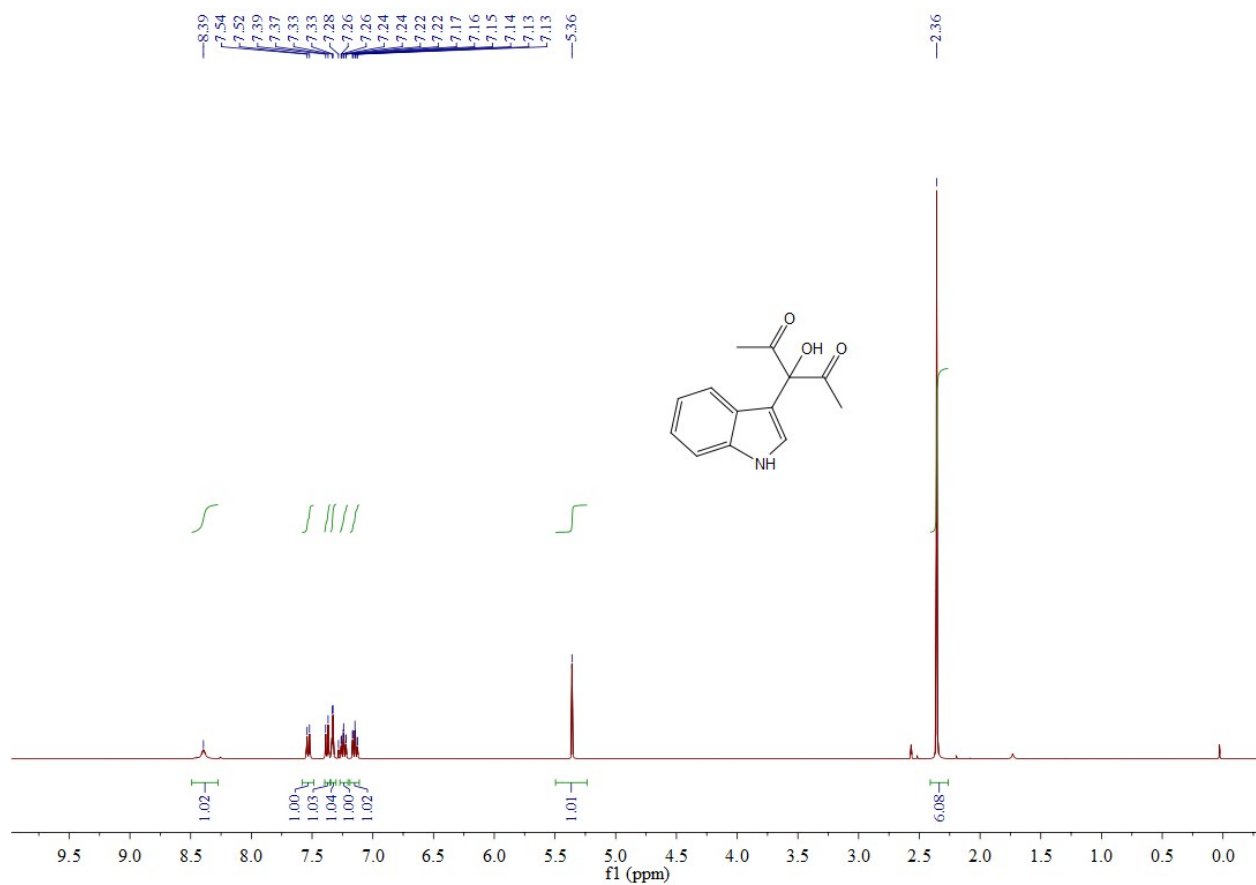

<sup>1</sup>H NMR of **4ag** in CDCl<sub>3</sub> at 297 K (δ in ppm).

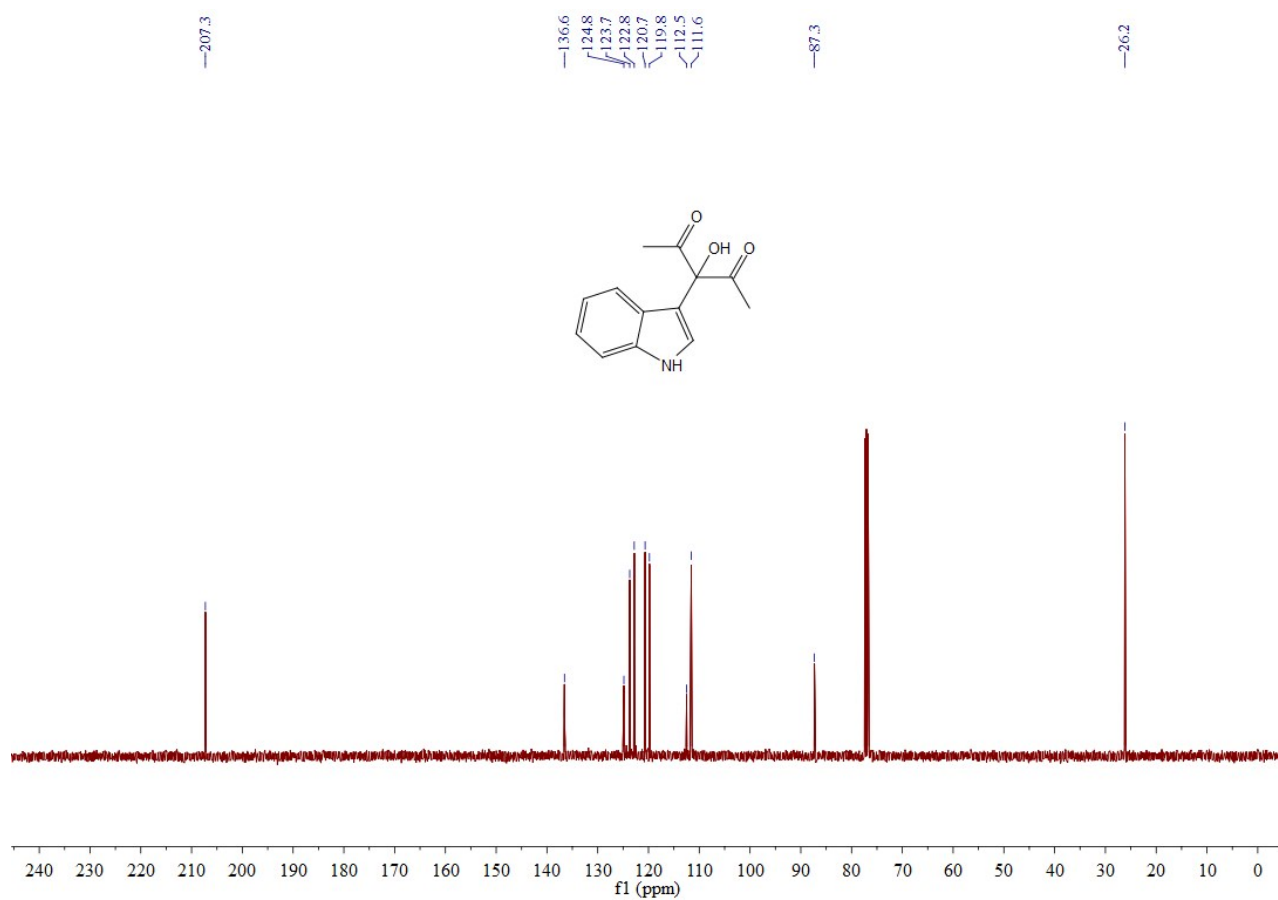

<sup>13</sup>C NMR of **4ag** in CDCl<sub>3</sub> at 299 K (δ in ppm).

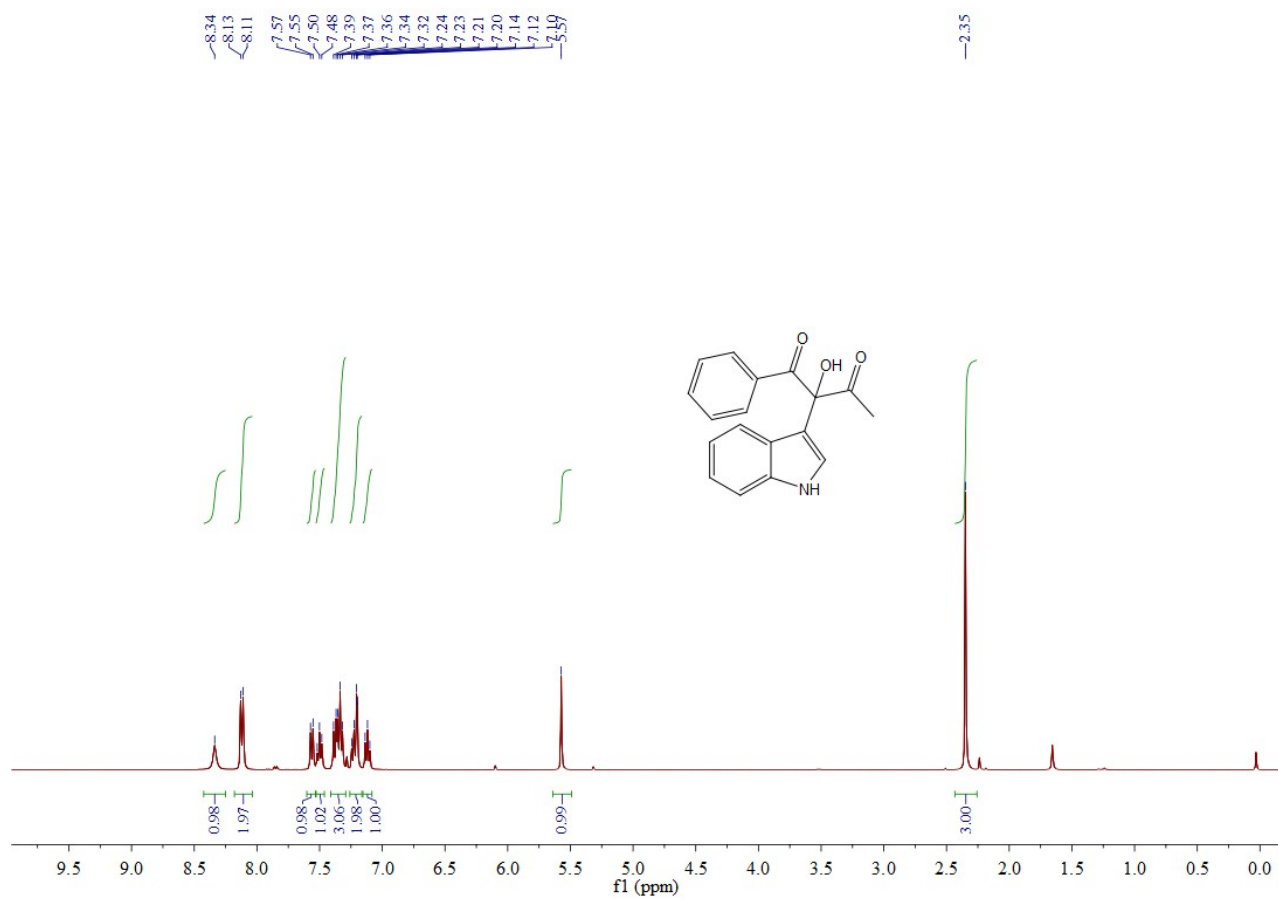

$^1\text{H NMR}$  of **4ah** in  $\text{CDCl}_3$  at 297 K ( $\delta$  in ppm).

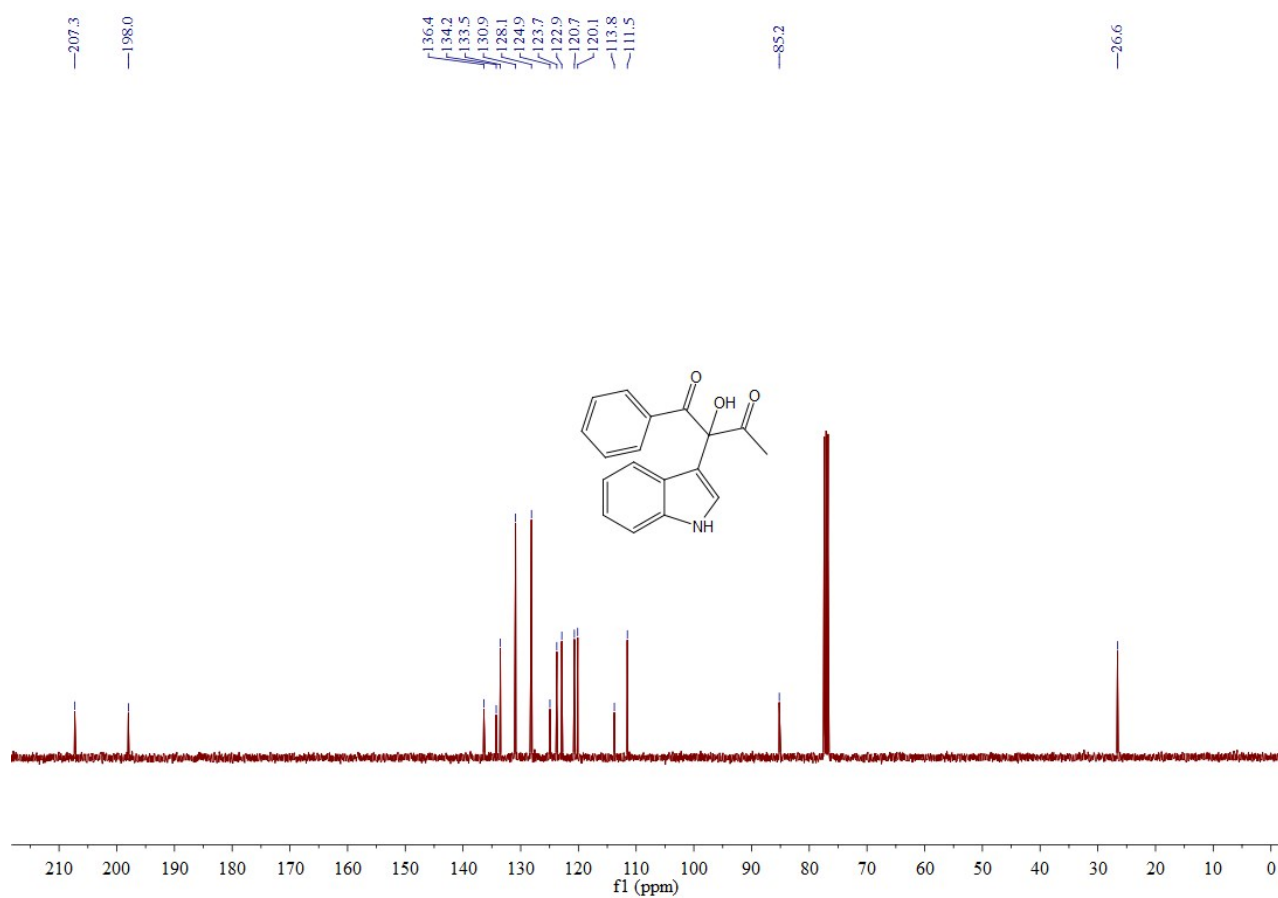

$^{13}\text{C NMR}$  of **4ah** in  $\text{CDCl}_3$  at 297 K ( $\delta$  in ppm).

## 7. $^1\text{H}$ and $^{13}\text{C}$ NMR Spectra of Compound 6aa-6ba

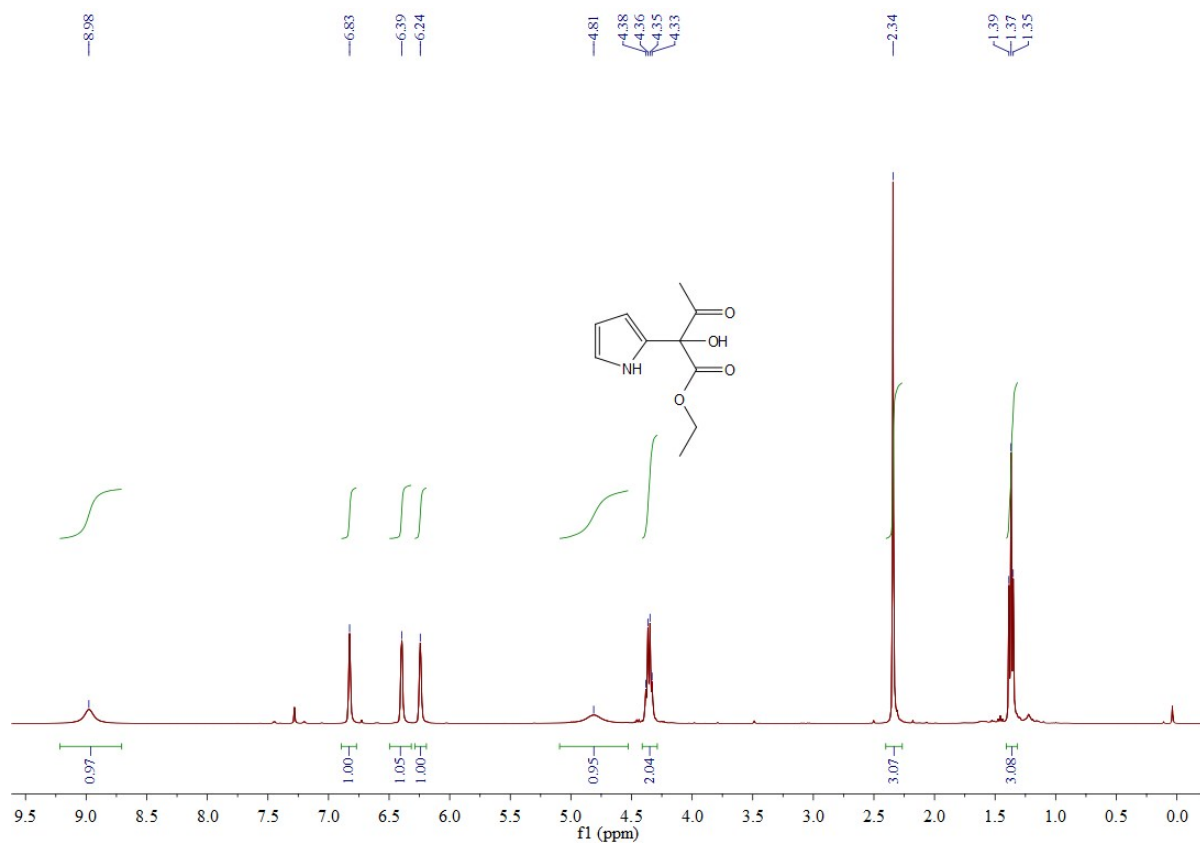

$^1\text{H}$  NMR of **6aa** in  $\text{CDCl}_3$  at 297 K ( $\delta$  in ppm).

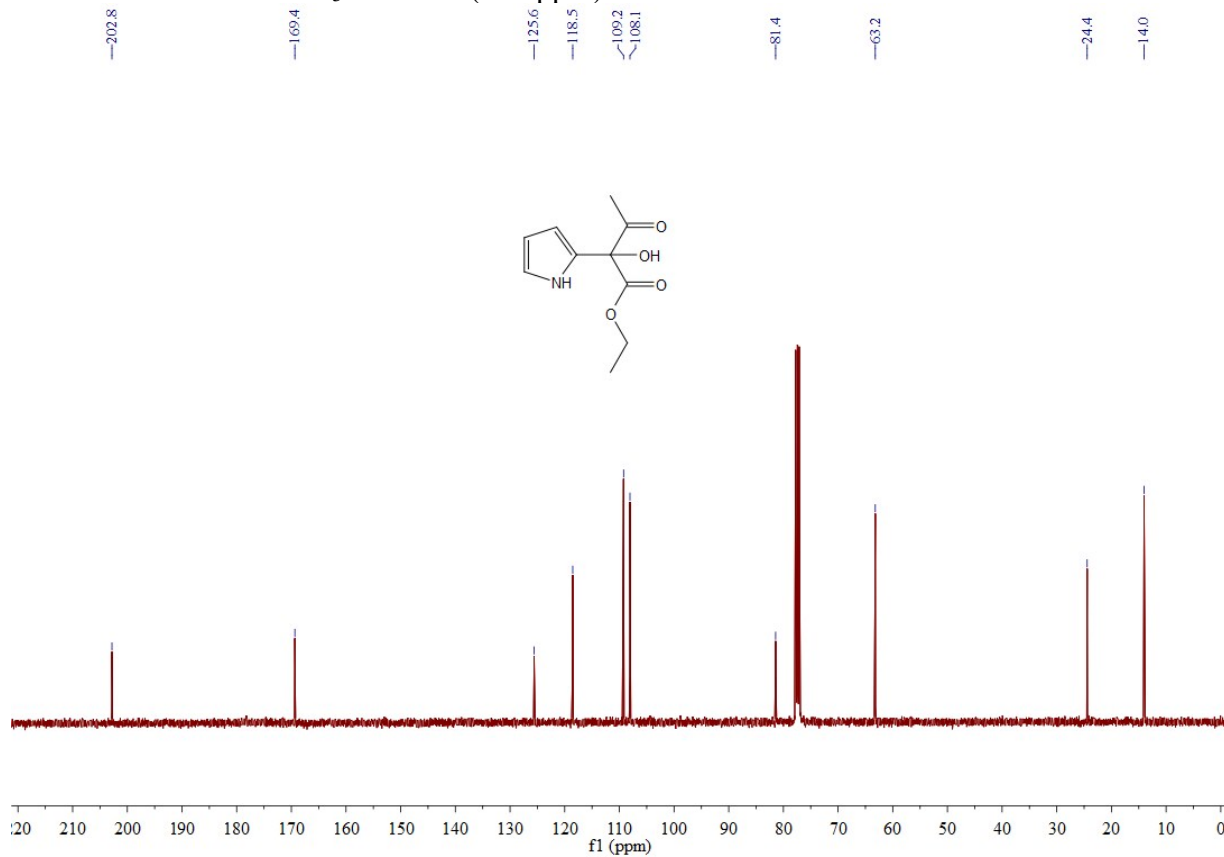

$^{13}\text{C}$  NMR of **6aa** in  $\text{CDCl}_3$  at 297 K ( $\delta$  in ppm).

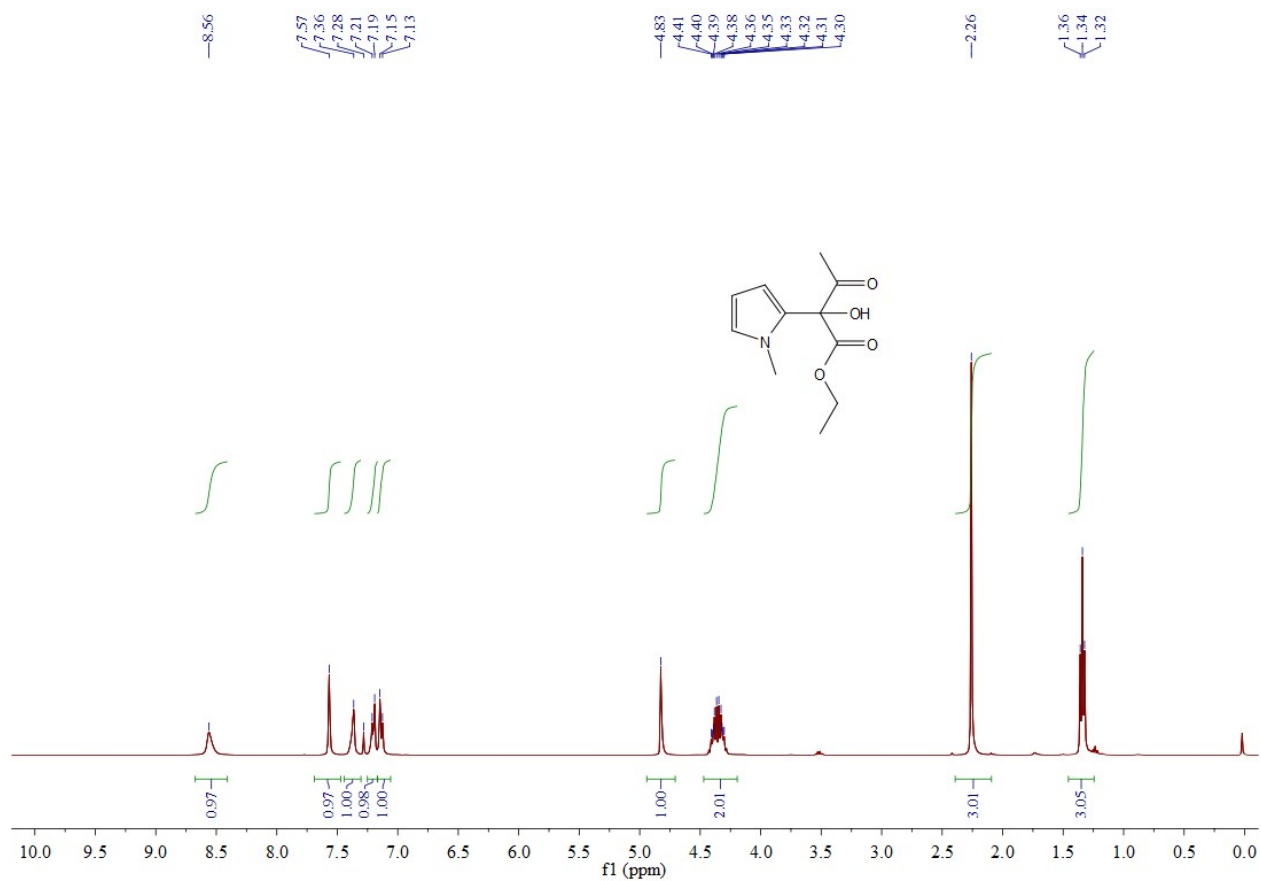

<sup>1</sup>H NMR of **6ba** in CDCl<sub>3</sub> at 299 K (δ in ppm).

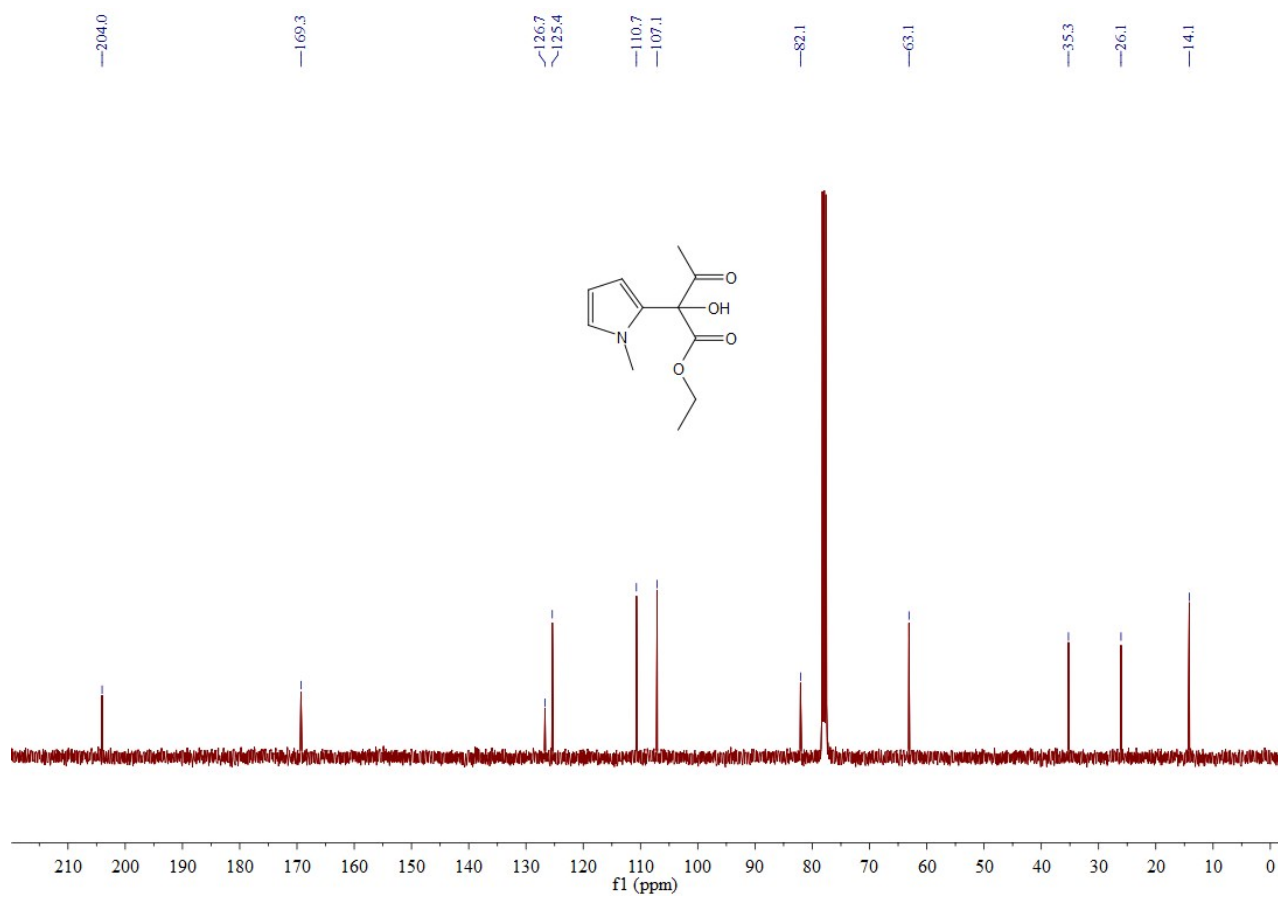

<sup>13</sup>C NMR of **6ba** in CDCl<sub>3</sub> at 299 K (δ in ppm).

## 8. X-ray crystal structure of **3aa**

ORTEP plot of **3aa** shown with ellipsoids at the 30% level.

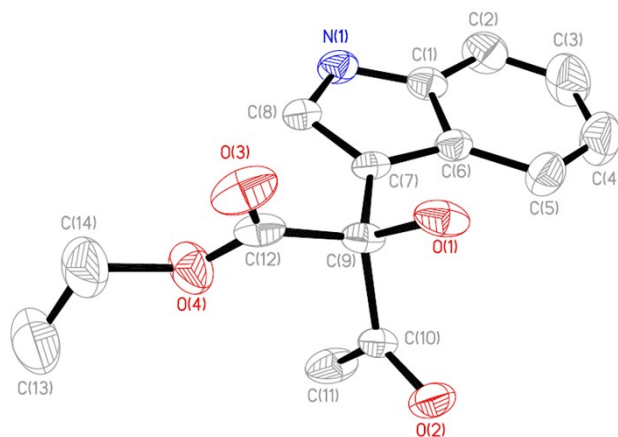

Supplement: c5ra17383c1.pdf [file c5ra17383c1.pdf]
